# Supplementary material for: Gallium-catalyzed reductive lactonization of γ-keto acids with a hydrosilane
Source: Royal Society of Chemistry journal article supplement (doi:10.1039/c6ra19286f), 2016-01-01
Supplement: c6ra19286f1.pdf [file c6ra19286f1.pdf]

## ***Electronic Supplementary Information***

### *Gallium-Catalyzed Reductive Lactonization of Keto Acids using a Hydrosilane*

Norio Sakai,\* Shuhei Horikawa, and Yohei Ogiwara

*Department of Pure and Applied Chemistry, Faculty of Science and Technology,  
Tokyo University of Science (RIKADAI), Noda, Chiba 278-8510, Japan*

*E-mail: sakachem@rs.noda.tus.ac.jp*

#### **Table of Contents**

|                                                                                     |         |
|-------------------------------------------------------------------------------------|---------|
| General                                                                             | S2      |
| Spectral data of keto acid derivatives                                              | S2-S7   |
| Spectral data of $\gamma$ -lactones and by-products                                 | S7-S14  |
| References and Notes                                                                | S15     |
| $^1\text{H}$ and $^{13}\text{C}$ NMR charts of new compounds and $\gamma$ -lactones | S16-S83 |

## General

All reactions were carried out under a N<sub>2</sub> atmosphere, unless otherwise noted. Benzene and toluene were distilled from a Na/benzophenone ketyl. All gallium compounds and other metal compounds were commercially available and were used without further purification. Hydrosilanes were used without further purification. 3-Benzoylpropionic acid (**1a**) is commercial available and purified by recrystallization prior to use. Reactions were monitored by TLC analysis of reaction aliquots. Column chromatography was performed using a silica gel. <sup>1</sup>H NMR spectra were measured at 500 (or 300) MHz using tetramethylsilane as an internal standard (0.00 ppm). <sup>13</sup>C NMR spectra were measured at 125 (or 75) MHz using the center peak of chloroform (77.0 ppm). High-resolution mass spectra (HRMS) were measured using NBA (3-nitrobenzylalcohol) as a matrix.

## Synthesis of keto acid derivatives

Keto acid derivatives were synthesized by either Method A or Method B described in the corresponding literatures, except for **1a**.

**Method A:** To a solution of succinic anhydride (10 mmol) and AlCl<sub>3</sub> (22 mmol, 2.9 g) in CH<sub>2</sub>Cl<sub>2</sub> (20 mL) was added aromatic hydrocarbon derivatives (11 mmol). The reaction mixture was stirred at room temperature over 6 h. After the reaction, the mixture was quenched with an aqueous solution of 1N HCl (10 mL). The aqueous layer was extracted with CH<sub>2</sub>Cl<sub>2</sub> (15 mL x 3) and the organic phase was combined, dried with anhydrous Na<sub>2</sub>SO<sub>4</sub> and evaporated under reduced pressure. The crude product was purified by recrystallization (hexane/CH<sub>2</sub>Cl<sub>2</sub> or toluene) to give the corresponding keto acid.

**Method B:** To a solution of Mg (13.0 mmol, 316 mg) in THF (5 mL) was added dropwise a solution of aryl bromide derivatives (12 mmol) and THF (15 mL) for 24 h. The mixture was then added to a solution of succinic anhydride (10 mmol) in THF (10 mL) at -90 °C. The mixture was stirred at room temperature over 6 h. After the reaction, the mixture was quenched with an aqueous solution of 1N HCl (10 mL). The aqueous layer was extracted with Et<sub>2</sub>O (15 mL x 3) and the organic phase was combined, dried with anhydrous Na<sub>2</sub>SO<sub>4</sub> and evaporated under reduced pressure. The crude product was purified by recrystallization (hexane/CH<sub>2</sub>Cl<sub>2</sub> or toluene) to give the corresponding keto acids.

## 3-(2-Methylbenzoyl)propionic acid<sup>1</sup> (**1b**)

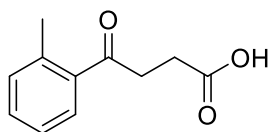

The preparation is reported in our previous report, and the spectra data are in agreement with the literature<sup>1</sup>.

### 3-(3-Methylbenzoyl)propionic acid<sup>1</sup> (1c)

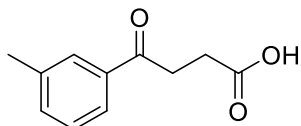

Method B; a white solid: <sup>1</sup>H NMR (CDCl<sub>3</sub>, 500 MHz)  $\delta$  2.41 (s, 3 H, CH<sub>3</sub>), 2.81 (t,  $J$  = 6.5 Hz, 2 H, CH<sub>2</sub>), 3.30 (t,  $J$  = 6.5 Hz, 2 H, CH<sub>2</sub>), 7.34-7.40 (m, 2 H, ArH), 7.77-7.79 (m, 2 H, ArH); <sup>13</sup>C NMR (CDCl<sub>3</sub>, 125 MHz)  $\delta$  21.3, 28.0, 33.2, 125.2, 128.5, 128.6, 134.1, 136.4, 138.4, 178.8, 198.1; MS (EI)  $m/z$  (%) 192 (M<sup>+</sup>, 22), 119 (100).

### 3-(4-Methylbenzoyl)propionic acid<sup>1</sup> (1d)

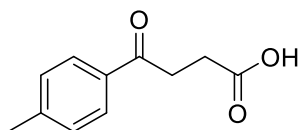

Method A; a white solid: <sup>1</sup>H NMR (CDCl<sub>3</sub>, 300 MHz)  $\delta$  2.41 (s, 3 H, CH<sub>3</sub>), 2.80 (t,  $J$  = 6.5 Hz, 2 H, CH<sub>2</sub>), 3.29 (t,  $J$  = 6.5 Hz, 2 H, CH<sub>2</sub>), 7.26 (d,  $J$  = 7.4 Hz, 2 H, ArH), 7.87 (d,  $J$  = 7.4 Hz, 2 H, ArH); <sup>13</sup>C NMR (CDCl<sub>3</sub>, 75 MHz)  $\delta$  21.6, 28.0, 33.0, 128.1, 129.3, 133.9, 144.2, 178.6, 197.5; MS (EI)  $m/z$  (%) 192 (M<sup>+</sup>, 17), 119 (100).

### 3-(2, 5-Dimethylbenzoyl)propionic acid<sup>1</sup> (1e)

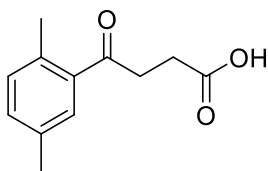

Method A; a white solid: <sup>1</sup>H NMR (CDCl<sub>3</sub>, 500 MHz)  $\delta$  2.37 (s, 3 H, CH<sub>3</sub>), 2.45 (s, 3 H, CH<sub>3</sub>), 2.79 (t,  $J$  = 6.5 Hz, 2 H, CH<sub>2</sub>), 3.22 (t,  $J$  = 6.5 Hz, 2 H, CH<sub>2</sub>), 7.13 (d,  $J$  = 7.5 Hz, 1 H, ArH), 7.20 (d,  $J$  = 7.5 Hz, 1 H, ArH), 7.50 (s, 1 H, ArH); <sup>13</sup>C NMR (CDCl<sub>3</sub>, 125 MHz)  $\delta$  20.9, 20.9, 28.2, 35.8, 129.2, 131.9, 132.3, 135.2, 137.1, 178.5, 201.7; MS (EI)  $m/z$  (%) 206 (M<sup>+</sup>, 50), 133 (100).

### 3-(5,6,7,8-Tetrahydro-2-naphthoyl)propionic acid<sup>1</sup> (1f)

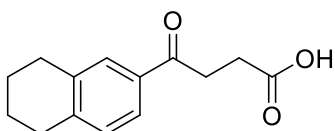

The preparation is reported in our previous report, and the spectra data are in agreement with the literature.<sup>1</sup>

### 3-(4-Methoxybenzoyl)propionic acid<sup>1</sup> (1g)<sup>1</sup>

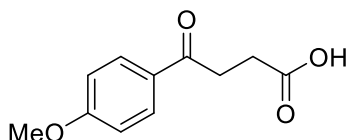

Method A; a white solid: <sup>1</sup>H NMR (CDCl<sub>3</sub>, 500 MHz)  $\delta$  2.80 (t,  $J$  = 6.5 Hz, 2 H, CH<sub>2</sub>), 3.28 (t,  $J$  = 6.5 Hz, 2 H, CH<sub>2</sub>), 3.88 (s, 3 H, CH<sub>3</sub>), 6.94 (d,  $J$  = 9.0 Hz, 2 H, ArH), 7.97 (d,  $J$  = 9.0 Hz, 2 H, ArH); <sup>13</sup>C NMR (CDCl<sub>3</sub>, 125 MHz)  $\delta$  28.1, 32.8, 55.5, 113.8, 129.5, 130.3, 163.7, 178.2, 196.4; MS (EI)  $m/z$  (%) 208 (M<sup>+</sup>, 9), 135 (100).

### 3-(4-Phenoxybenzoyl)propionic acid<sup>1</sup> (1h)

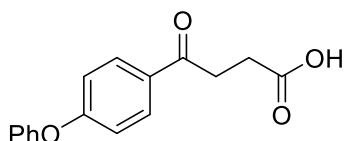

The preparation is reported in our previous report, and spectra data are in agreement with the literature.<sup>1</sup>

### 3-(3-Methoxybenzoyl)propionic acid<sup>2</sup> (1i)

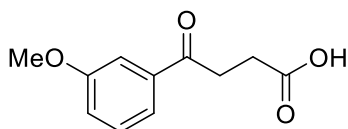

Method B; a white solid: mp 108–109 °C; <sup>1</sup>H NMR (CDCl<sub>3</sub>, 500 MHz)  $\delta$  2.81 (t,  $J$  = 6.5 Hz, 2 H, CH<sub>2</sub>), 3.30 (t,  $J$  = 6.5 Hz, 2 H, CH<sub>2</sub>), 3.85 (s, 3 H, CH<sub>3</sub>), 7.12 (d,  $J$  = 8.0 Hz, 1 H, ArH), 7.38 (dd,  $J$  = 8.0 Hz, 7.5 Hz, 1 H, ArH), 7.50 (s, 1 H, ArH), 7.56 (d,  $J$  = 7.5 Hz, 1 H, ArH); <sup>13</sup>C NMR (CDCl<sub>3</sub>, 125 MHz)  $\delta$  28.0, 33.2, 55.4, 112.2, 119.9, 120.7, 129.6, 137.7, 159.8, 178.8, 197.6; IR (ATR, cm<sup>-1</sup>) 1686 s; MS (EI)  $m/z$  (%) 208 (M<sup>+</sup>, 21), 135 (100); HRMS (FAB-Magnetic Sector): calcd. for C<sub>11</sub>H<sub>13</sub>O<sub>4</sub> [M+H]<sup>+</sup>: 209.080, found: 209.0818.

### 3-(4-Fluorobenzoyl)propionic acid<sup>1</sup> (1j)

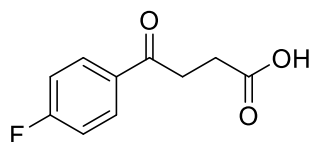

Method A; a white solid: <sup>1</sup>H NMR (CDCl<sub>3</sub>, 300 MHz)  $\delta$  2.82 (t,  $J$  = 6.5 Hz, 2 H, CH<sub>2</sub>), 3.29 (t,  $J$  = 6.5 Hz, 2 H, CH<sub>2</sub>), 7.14 (dd,  $J$  = 8.3 Hz, 8.3 Hz, 2 H, ArH), 8.01 (dd,  $J$  = 8.3 Hz, 5.7 Hz, 2 H, ArH); <sup>13</sup>C NMR (CDCl<sub>3</sub>, 75 MHz)  $\delta$  28.0, 33.0, 115.8 ( $J_{C-F}$  = 22.6 Hz), 130.7 ( $J_{C-F}$  = 8.8 Hz), 132.8 ( $J_{C-F}$  = 2.5 Hz), 165.9 ( $J_{C-F}$  = 255.3 Hz), 178.7, 196.2; MS (EI)  $m/z$  (%) 196 (M<sup>+</sup>, 9), 123 (100).

### 3-(4-Chlorobenzoyl)propionic acid<sup>1</sup> (1k)

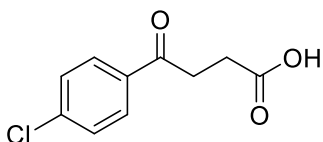

Method A; a white solid: <sup>1</sup>H NMR (CDCl<sub>3</sub>, 500 MHz) δ 2.81 (t, *J* = 6.5 Hz, 2 H, CH<sub>2</sub>), 3.28 (t, *J* = 6.5 Hz, 2 H, CH<sub>2</sub>), 7.45 (d, *J* = 8.0 Hz, 2 H, ArH), 7.92 (d, *J* = 8.0 Hz, 2 H, ArH); <sup>13</sup>C NMR (CDCl<sub>3</sub>, 125 MHz) δ 27.9, 33.1, 129.0, 129.5, 134.7, 139.8, 178.5, 196.6; MS (EI) *m/z* (%) 214 (M<sup>+</sup>+2, 2), 212 (M<sup>+</sup>, 7), 139 (100).

### 3-(4-Bromobenzoyl)propionic acid<sup>1</sup> (1l)

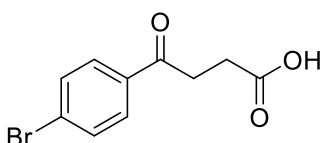

Method A; a white solid: <sup>1</sup>H NMR (CDCl<sub>3</sub>, 300 MHz) δ 2.81 (t, *J* = 6.5 Hz, 2 H, CH<sub>2</sub>), 3.27 (t, *J* = 6.5 Hz, 2 H, CH<sub>2</sub>), 7.62 (d, *J* = 8.3 Hz, 2 H, ArH), 7.84 (d, *J* = 8.3 Hz, 2 H, ArH); <sup>13</sup>C NMR (CDCl<sub>3</sub>, 75 MHz) δ 27.9, 33.1, 128.5, 129.5, 132.0, 135.1, 178.5, 196.8; MS (EI) *m/z* (%) 258 (M<sup>+</sup>+2, 8), 256 (M<sup>+</sup>, 8), 183 (100).

### 3-(4-Trifluoromethylbenzoyl)propionic acid<sup>3</sup> (1m)

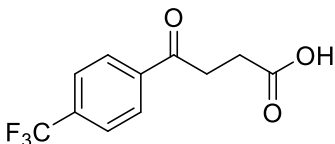

Method B; a white solid: mp 129–130 °C; <sup>1</sup>H NMR (CDCl<sub>3</sub>, 500 MHz) δ 2.85 (t, *J* = 6.5 Hz, 2 H, CH<sub>2</sub>), 3.33 (t, *J* = 6.5 Hz, 2 H, CH<sub>2</sub>), 7.75 (d, *J* = 8.0 Hz, 2 H, ArH), 8.09 (d, *J* = 8.0 Hz, 2 H, ArH); <sup>13</sup>C NMR (CDCl<sub>3</sub>, 125 MHz) δ 27.8, 33.4, 123.5 (*J*<sub>C-F</sub> = 272.9 Hz), 125.7 (*J*<sub>C-F</sub> = 3.8 Hz), 128.4, 134.6 (*J*<sub>C-F</sub> = 32.7 Hz), 139.0 (*J*<sub>C-F</sub> = 1.3 Hz), 178.5, 196.9; IR (ATR, cm<sup>-1</sup>) 1715 m, 1688 s; MS (FAB) *m/z* (%) 247 (M+H<sup>+</sup>); HRMS (FAB-Magnetic Sector): calcd. for C<sub>11</sub>H<sub>10</sub>F<sub>3</sub>O<sub>3</sub> [M+H]<sup>+</sup>: 247.0577, found: 247.0592.

### 4-([1,1'-Biphenyl]-4-yl)-4-oxobutanoic acid<sup>1</sup> (1n)

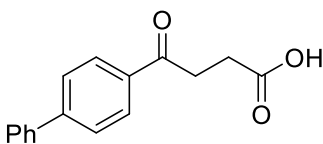

The preparation is reported in our previous report, and spectra data are in agreement with the literature.<sup>1</sup>

#### 4-(1-Naphthyl)-4-oxobutanoic acid<sup>1</sup> (1o)

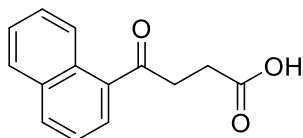

Method B; a white solid: <sup>1</sup>H NMR (CDCl<sub>3</sub>, 300 MHz) δ 2.90 (t, *J* = 6.5 Hz, 2 H, CH<sub>2</sub>), 3.40 (t, *J* = 6.5 Hz, 2 H, CH<sub>2</sub>), 7.50-7.60 (m, 3 H, ArH), 7.88 (d, *J* = 8.5 Hz, 1 H, ArH), 7.95 (d, *J* = 8.5 Hz, 1 H, ArH), 8.00 (d, *J* = 8.5 Hz, 1 H, ArH), 8.62 (d, *J* = 8.5 Hz, 1 H, ArH); <sup>13</sup>C NMR (CDCl<sub>3</sub>, 75 MHz) δ 28.4, 36.3, 124.3, 125.8, 126.5, 127.7, 128.0, 128.4, 130.1, 132.9, 133.9, 135.2, 178.9, 201.8; MS (EI) *m/z* (%) 228 (M<sup>+</sup>, 74), 155 (100).

#### 4-(2-Thienyl)-4-oxobutanoic acid<sup>4</sup> (1p)

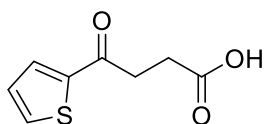

Method A; a green solid: <sup>1</sup>H NMR (CDCl<sub>3</sub>, 500 MHz) δ 2.81 (t, *J* = 6.5 Hz, 2 H, CH<sub>2</sub>), 3.26 (t, *J* = 6.5 Hz, 2 H, CH<sub>2</sub>), 7.14 (t, *J* = 4.5 Hz, 1 H, ArH), 7.65 (d, *J* = 4.5 Hz, 1 H, ArH), 7.77 (d, *J* = 4.5 Hz, 1 H, ArH); <sup>13</sup>C NMR (CDCl<sub>3</sub>, 125 MHz) δ 28.0, 33.6, 128.1, 132.1, 133.8, 143.4, 178.5, 190.7; MS (EI) *m/z* (%) 184 (M<sup>+</sup>, 14), 110 (100); HRMS (EI-Quadrupole): calcd. for C<sub>8</sub>H<sub>8</sub>O<sub>3</sub>S [M]<sup>+</sup>: 184.0194, found: 184.0177.

#### γ-Oxo-benzenehexanoic acid<sup>5</sup> (3)

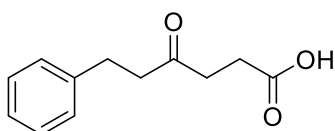

Method B; a white solid: mp 90–91 °C; <sup>1</sup>H NMR (CDCl<sub>3</sub>, 500 MHz) δ 2.63 (t, *J* = 6.5 Hz, 2 H, CH<sub>2</sub>), 2.70 (t, *J* = 6.5 Hz, 2 H, CH<sub>2</sub>), 2.79 (t, *J* = 7.5 Hz, 2 H, CH<sub>2</sub>), 2.92 (t, *J* = 7.5 Hz, 2 H, CH<sub>2</sub>), 7.17-7.21 (m, 3 H, ArH), 7.26-7.29 (m, 2 H, ArH); <sup>13</sup>C NMR (CDCl<sub>3</sub>, 125 MHz) δ 27.7, 29.6, 36.9, 44.1, 126.1, 128.3, 128.5, 140.8, 178.5, 207.8; IR (ATR, cm<sup>-1</sup>) 1703 w; MS (EI) *m/z* (%) 206 (M<sup>+</sup>, 30), 91 (100); HRMS (EI-Quadrupole): calcd. for C<sub>12</sub>H<sub>14</sub>O<sub>3</sub> [M]<sup>+</sup>: 206.0943, found: 206.0948.

#### 2-Benzoylbenzoic acid<sup>1</sup> (5)

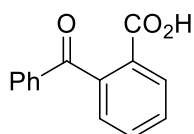

The preparation is reported in our previous report, and the spectra data are in agreement with the literature.<sup>1</sup>

### 5-Oxo-5-phenylpentanoic acid<sup>6</sup> (7)

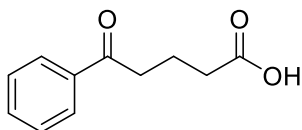

Method B; a white solid: <sup>1</sup>H NMR (CDCl<sub>3</sub>, 500 MHz)  $\delta$  2.09 (quint,  $J = 7.0$  Hz, 2 H, CH<sub>2</sub>), 2.51 (t,  $J = 7.0$  Hz, 2 H, CH<sub>2</sub>), 3.08 (t,  $J = 7.0$  Hz, 2 H, CH<sub>2</sub>), 7.46 (t,  $J = 7.0$  Hz, 2 H, ArH), 7.56 (d,  $J = 7.0$  Hz, 1 H, ArH), 7.96 (d,  $J = 7.0$  Hz, 2 H, ArH); <sup>13</sup>C NMR (CDCl<sub>3</sub>, 125 MHz)  $\delta$  18.9, 33.0, 37.3, 128.0, 128.6, 133.1, 136.7, 179.4, 199.3; MS (EI)  $m/z$  (%) 192 (M<sup>+</sup>, 7), 105 (100).

**General procedure for the synthesis of the  $\gamma$ -lactone derivatives:** To a screw-capped tube, GaCl<sub>3</sub> (0.010 mmol, 8.8 mg), benzene (2 mL), a keto acid (1.0 mmol), and PhSiH<sub>3</sub> (1.00 mmol, 108 mg) were successively added. After the tube was sealed with a cap that contained a PTFE septum, the mixture was heated at 60 °C for the reaction time shown in Table 2. After the reaction, H<sub>2</sub>O (2 mL) was added to the reaction mixture, which of the organic layer was extracted with EtOAc (5 mL x 3). The combined organic phases were evaporated under reduced pressure. To remove the siloxane residue, MeOH (15 mL) was rinsed to the crude material. The formed precipitate was filtered, and the filtrate was concentrated under reduced pressure. The crude product was purified by a silica gel column chromatography (hexane/EtOAc) to afford the lactone derivative.

### 5-Phenyl-dihydro-furan-2-one<sup>7</sup> (2a)

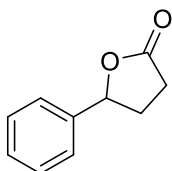

General procedure was followed with 3-benzoylpropionic acid (**1a**, 178.4 mg) for 24 h. Column chromatography (7/3 = hexane/EtOAc) afforded **2a** as a colorless oil (152.8 mg, 94%): <sup>1</sup>H NMR (CDCl<sub>3</sub>, 300 MHz)  $\delta$  2.12-2.28 (m, 1 H, CH<sub>2</sub>), 2.62-2.73 (m, 3 H, CH<sub>2</sub>, CH<sub>2</sub>), 5.49-5.54 (m, 1 H, CH), 7.32-7.42 (m, 5 H, ArH); <sup>13</sup>C NMR (CDCl<sub>3</sub>, 75 MHz)  $\delta$  28.9, 30.9, 81.2, 125.2, 128.4, 128.7, 139.4, 176.9; IR (ATR, cm<sup>-1</sup>) 1772 s; MS (EI)  $m/z$  (%) 162 (M<sup>+</sup>, 100); HRMS (EI-Quadrupole): calcd. for C<sub>10</sub>H<sub>10</sub>O<sub>2</sub> [M]<sup>+</sup>: 162.0681, found: 162.0685.

### 5-*o*-Tolyl-dihydro-furan-2-one<sup>7</sup> (2b)

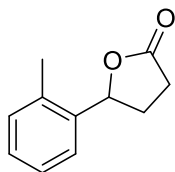

General procedure was followed with 3-(2-methylbenzoyl)propionic acid (**1b**, 192.6 mg) for 24 h. Column chromatography (7/3 = hexane/EtOAc) afforded **2b** as a colorless oil (151.8 mg, 86%): <sup>1</sup>H

NMR (CDCl<sub>3</sub>, 500 MHz)  $\delta$  2.06-2.14 (m, 1 H, CH<sub>2</sub>), 2.34 (s, 3 H, CH<sub>3</sub>), 2.64-2.71 (m, 3 H, CH<sub>2</sub>, CH<sub>2</sub>), 5.69-5.72 (m, 1 H, CH), 7.18 (dd,  $J$  = 4.5 Hz, 4.5 Hz, 1 H, ArH), 7.23-7.25 (m, 2 H, ArH), 7.35 (dd,  $J$  = 5.0 Hz, 4.5 Hz, 1 H, ArH); <sup>13</sup>C NMR (CDCl<sub>3</sub>, 125 MHz)  $\delta$  18.9, 28.6, 29.5, 78.8, 124.1, 126.4, 128.1, 130.7, 134.1, 137.5, 177.1; IR (ATR, cm<sup>-1</sup>) 1774 s; MS (EI)  $m/z$  (%) 176 (M<sup>+</sup>, 100); HRMS (EI-Quadrupole): calcd. for C<sub>11</sub>H<sub>12</sub>O<sub>2</sub> [M]<sup>+</sup>: 176.0837, found: 176.0844.

### 5-*m*-Tolyl-dihydro-furan-2-one<sup>7</sup> (2c)

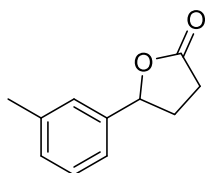

General procedure was followed with 3-(3-methylbenzoyl)propionic acid (**1c**, 192.4 mg) for 24 h. Column chromatography (7/3 = hexane/EtOAc) afforded **2c** as a colorless oil (166.7 mg, 95%): <sup>1</sup>H NMR (CDCl<sub>3</sub>, 500 MHz)  $\delta$  2.13-2.23 (m, 1 H, CH<sub>2</sub>), 2.36 (s, 3 H, CH<sub>3</sub>), 2.60-2.67 (m, 3 H, CH<sub>2</sub>, CH<sub>2</sub>), 5.46-5.49 (m, 1 H, CH), 7.11-7.15 (m, 3 H, ArH), 7.25-7.29 (m, 1 H, ArH); <sup>13</sup>C NMR (CDCl<sub>3</sub>, 125 MHz)  $\delta$  21.3, 28.9, 30.9, 81.2, 122.3, 125.8, 128.6, 129.1, 138.5, 139.3, 176.9; IR (ATR, cm<sup>-1</sup>) 1774 s; MS (EI)  $m/z$  (%) 176 (M<sup>+</sup>, 100); HRMS (EI-Quadrupole): calcd. for C<sub>11</sub>H<sub>12</sub>O<sub>2</sub> [M]<sup>+</sup>: 176.0837, found: 176.0839.

### 5-*p*-Tolyl-dihydro-furan-2-one<sup>7</sup> (2d)

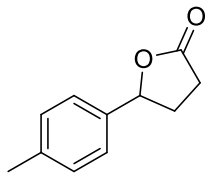

General procedure was followed with 3-(4-methylbenzoyl)propionic acid (**1d**, 192.0 mg) for 24 h. Column chromatography (7/3 = hexane/EtOAc) afforded **2d** as a white solid (157.7 mg, 90%): mp 70–71 °C; <sup>1</sup>H NMR (CDCl<sub>3</sub>, 500 MHz)  $\delta$  2.15-2.21 (m, 1 H, CH<sub>2</sub>), 2.36 (s, 3 H, CH<sub>3</sub>), 2.61-2.66 (m, 3 H, CH<sub>2</sub>, CH<sub>2</sub>), 5.47-5.50 (m, 1 H, CH), 7.19-7.24 (m, 4 H, ArH); <sup>13</sup>C NMR (CDCl<sub>3</sub>, 125 MHz)  $\delta$  21.1, 29.0, 30.9, 81.3, 125.3, 129.3, 136.2, 138.3, 177.0; IR (ATR, cm<sup>-1</sup>) 1764 s; MS (EI)  $m/z$  (%) 176 (M<sup>+</sup>, 87), 121 (100); HRMS (EI-Quadrupole): calcd. for C<sub>11</sub>H<sub>12</sub>O<sub>2</sub> [M]<sup>+</sup>: 176.0837, found: 176.0839.

### 5-(2, 5-Dimethylphenyl)-dihydro-furan-2-one<sup>8</sup> (2e)

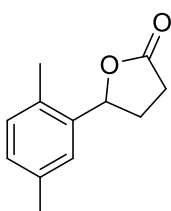

General procedure was followed with 3-(2,5-dimethylbenzoyl)propionic acid (**1e**, 206.7 mg) for 24



h. Column chromatography (7/3 = hexane/EtOAc) afforded **2e** as a pale yellow solid (147.4 mg, 78%): mp 76–77 °C; <sup>1</sup>H NMR (CDCl<sub>3</sub>, 500 MHz) δ 2.07-2.12 (m, 1 H, CH<sub>2</sub>), 2.28 (s, 3 H, CH<sub>3</sub>), 2.32 (s, 3 H, CH<sub>3</sub>), 2.64-2.66 (m, 3 H, CH<sub>2</sub>, CH<sub>2</sub>), 5.67-5.69 (m, 1 H, CH), 7.03-7.08 (m, 2 H, ArH), 7.16 (s, 1 H, ArH); <sup>13</sup>C NMR (CDCl<sub>3</sub>, 125 MHz) δ 18.4, 21.0, 28.6, 29.6, 78.9, 124.7, 128.7, 130.6, 130.8, 135.9, 137.3, 177.1; IR (ATR, cm<sup>-1</sup>) 1768 s; MS (EI) *m/z* (%) 190 (M<sup>+</sup>,100); HRMS (EI-Quadrupole): calcd. for C<sub>12</sub>H<sub>14</sub>O<sub>2</sub> [M]<sup>+</sup>: 190.0994, found: 199.0990.

#### 5-(5,6,7,8-Tetrahydronaphthalen-2-yl)dihydrofuran-2(3H)-one (**2f**)

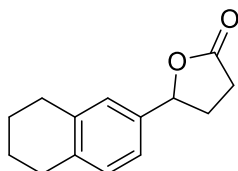

General procedure was followed with 4-oxo-4-(5,6,7,8-tetrahydronaphthalen-2-yl)butanoic acid (**1f**, 232.3 mg) for 24 h. Column chromatography (8/2 = hexane/EtOAc) afforded **2f** as a pale yellow oil (210.4 mg, 97%): <sup>1</sup>H NMR (CDCl<sub>3</sub>, 500 MHz) δ 1.78-1.81 (m, 4 H, CH<sub>2</sub>), 2.15-2.22 (m, 1 H, CH<sub>2</sub>), 2.58-2.66 (m, 3 H, CH<sub>2</sub>), 2.76 (m, 4 H, CH<sub>2</sub>), 5.43-5.46 (m, 1 H, CH), 7.03-7.04 (m, 2 H, ArH), 7.07-7.09 (m, 1 H, ArH); <sup>13</sup>C NMR (CDCl<sub>3</sub>, 125 MHz) δ 23.0, 29.0, 29.1, 29.4, 30.9, 81.4, 122.4, 126.0, 129.5, 136.3, 137.6, 177.1; IR (ATR, cm<sup>-1</sup>) 1774 s; MS (EI) *m/z* (%) 216 (M<sup>+</sup>, 100); HRMS (EI-Quadrupole): calcd. for C<sub>14</sub>H<sub>16</sub>O<sub>2</sub> [M]<sup>+</sup>: 216.1150, found: 216.1137.

#### 5-(4-Phenoxyphenyl)-dihydro-furan-2-one (**2h**)

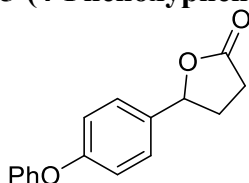

General procedure was followed with 3-(4-phenoxybenzoyl)propionic acid (**1h**, 270.1 mg) for 24 h. Column chromatography (7/3 = hexane/EtOAc) afforded **2h** as a white solid (182.0 mg, 72%): mp 60–62 °C; <sup>1</sup>H NMR (CDCl<sub>3</sub>, 500 MHz) δ 2.16-2.25 (m, 1 H, CH<sub>2</sub>), 2.60-2.68 (m, 3 H, CH<sub>2</sub>, CH<sub>2</sub>), 5.46-5.49 (m, 1 H, CH), 7.00-7.02 (m, 4 H, ArH), 7.12 (t, *J* = 7.5 Hz, 1 H, ArH), 7.29-7.36 (m, 4 H, ArH); <sup>13</sup>C NMR (CDCl<sub>3</sub>, 125 MHz) δ 29.1, 30.9, 81.0, 118.7, 119.1, 123.6, 127.0, 129.8, 133.7, 156.7, 157.5, 176.7; IR (ATR, cm<sup>-1</sup>) 1753 s; MS (EI) *m/z* (%) 254 (M<sup>+</sup>, 100); HRMS (EI-Quadrupole): calcd. for C<sub>16</sub>H<sub>14</sub>O<sub>3</sub> [M]<sup>+</sup>: 254.0943, found: 254.0949.

#### 5-(3-Methoxyphenyl)-dihydro-furan-2-one (**2i**)

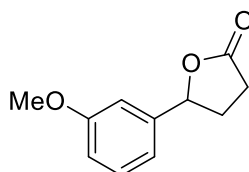

General procedure was followed with 3-(3-methoxybenzoyl)propionic acid (**1i**, 110.6 mg) for 24 h.

Column chromatography (8/2 = hexane/EtOAc) afforded **2i** as a colorless oil (160.5 mg, 84%):  $^1\text{H}$  NMR ( $\text{CDCl}_3$ , 500 MHz)  $\delta$  2.14-2.22 (m, 1 H,  $\text{CH}_2$ ), 2.62-2.68 (m, 3 H,  $\text{CH}_2$ ,  $\text{CH}_2$ ), 3.81 (s, 3 H,  $\text{OCH}_3$ ), 5.47-5.50 (m, 1 H,  $\text{CH}$ ), 6.86-6.91 (m, 3 H,  $\text{ArH}$ ), 7.27-7.32 (m, 1 H,  $\text{ArH}$ );  $^{13}\text{C}$  NMR ( $\text{CDCl}_3$ , 125 MHz)  $\delta$  28.8, 30.8, 55.2, 80.9, 110.7, 113.7, 117.3, 129.8, 141.0, 159.8, 176.8; IR (ATR,  $\text{cm}^{-1}$ ) 1774 s; MS (EI)  $m/z$  (%) 192 ( $\text{M}^+$ , 100); HRMS (FAB-Magnetic Sector): calcd. for  $\text{C}_{11}\text{H}_{13}\text{O}_3$  [ $\text{M}+\text{H}$ ] $^+$ : 193.0859, found: 193.0864.

#### 5-(4-Fluorophenyl)-dihydro-furan-2-one<sup>7</sup> (**2j**)

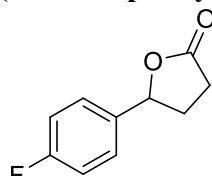

General procedure was followed with 3-(4-fluorobenzoyl)propionic acid (**1j**, 192.6 mg) for 7 days. Column chromatography (7/3 hexane/EtOAc) afforded **2j** as a pale yellow oil (136.2 mg, 76%):  $^1\text{H}$  NMR ( $\text{CDCl}_3$ , 500 MHz)  $\delta$  2.14-2.22 (m, 1 H,  $\text{CH}_2$ ), 2.62-2.68 (m, 3 H,  $\text{CH}_2$ ,  $\text{CH}_2$ ), 5.47-5.50 (m, 1 H,  $\text{CH}$ ), 7.08 (t,  $J = 8.5$  Hz, 2 H,  $\text{ArH}$ ), 7.32 (dd,  $J = 8.5$  Hz, 5.5 Hz, 2 H,  $\text{ArH}$ );  $^{13}\text{C}$  NMR ( $\text{CDCl}_3$ , 125 MHz)  $\delta$  29.0, 31.0, 80.6, 115.7 ( $J_{\text{C-F}} = 21.1$  Hz), 127.2 ( $J_{\text{C-F}} = 8.6$  Hz), 135.0 ( $J_{\text{C-F}} = 3.8$  Hz), 162.6 ( $J_{\text{C-F}} = 246.6$  Hz), 176.6; IR (ATR,  $\text{cm}^{-1}$ ) 1773 s; MS (EI)  $m/z$  (%) 180 ( $\text{M}^+$ , 95), 125 (100); HRMS (EI-Quadrupole): calcd. for  $\text{C}_{10}\text{H}_9\text{O}_2\text{F}$  [ $\text{M}$ ] $^+$ : 180.0587, found: 180.0587.

#### 5-(4-Chlorophenyl)-dihydro-furan-2-one<sup>7</sup> (**2k**)

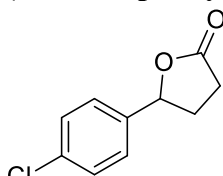

General procedure was followed with 3-(4-chlorobenzoyl)propionic acid (**1k**, 212.8 mg) for 7 days. Column chromatography (7/3 = hexane/EtOAc) afforded **2k** as a colorless oil (123.2 mg, 63%):  $^1\text{H}$  NMR ( $\text{CDCl}_3$ , 500 MHz)  $\delta$  2.13-2.18 (m, 1 H,  $\text{CH}_2$ ), 2.64-2.69 (m, 3 H,  $\text{CH}_2$ ,  $\text{CH}_2$ ), 5.46-5.49 (m, 1 H,  $\text{CH}$ ), 7.28 (d,  $J = 9.0$  Hz, 2 H,  $\text{ArH}$ ), 7.36 (d,  $J = 9.0$  Hz, 2 H,  $\text{ArH}$ );  $^{13}\text{C}$  NMR ( $\text{CDCl}_3$ , 125 MHz)  $\delta$  28.8, 30.9, 80.4, 126.6, 128.9, 134.2, 137.8, 176.5; IR (ATR,  $\text{cm}^{-1}$ ) 1776 s; MS (EI)  $m/z$  (%) 198 ( $\text{M}^++2$ , 17), 196 ( $\text{M}^+$ , 56), 58 (100); HRMS (EI-Quadrupole): calcd. for  $\text{C}_{10}\text{H}_9\text{O}_2\text{Cl}$  [ $\text{M}$ ] $^+$ : 196.0291, found: 196.0295.

#### 5-(4-Bromophenyl)-dihydro-furan-2-one<sup>7</sup> (**2l**)

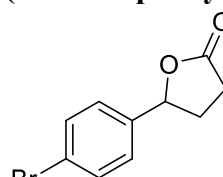

General procedure was followed with 3-(4-bromobenzoyl)propionic acid (**1l**, 161.4 mg) for 7 days.

Column chromatography (7/3 = hexane/EtOAc) afforded **2l** as a white solid (161.4 mg, 67%): mp 81–82 °C; <sup>1</sup>H NMR (CDCl<sub>3</sub>, 500 MHz) δ 2.13-2.18 (m, 1 H, CH<sub>2</sub>), 2.64-2.69 (m, 3 H, CH<sub>2</sub>, CH<sub>2</sub>), 5.45-5.48 (m, 1 H, CH), 7.22 (d, *J* = 9.0 Hz, 2 H, ArH), 7.52 (d, *J* = 9.0 Hz, 2 H, ArH); <sup>13</sup>C NMR (CDCl<sub>3</sub>, 125 MHz) δ 28.8, 30.9, 80.4, 122.4, 126.9, 131.9, 138.4, 176.5; IR (ATR, cm<sup>-1</sup>) 1760 s; MS (EI) *m/z* (%) 242 (M<sup>+</sup>+2, 32), 240 (M<sup>+</sup>, 33) 58 (100); HRMS (EI-Quadrupole): calcd. for C<sub>10</sub>H<sub>9</sub>O<sub>2</sub><sup>81</sup>Br [M+2]<sup>+</sup>: 241.9765, found: 241.9757.

### 5-(4-Trifluoromethylphenyl)-dihydro-furan-2-one<sup>9</sup> (**2m**)

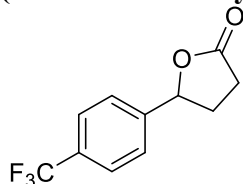

General procedure was followed with 3-(4-trifluoromethylbenzoyl)propionic acid (**1m**, 246.2 mg) for 24 h. Column chromatography (7/3 = hexane/EtOAc) afforded **2m** as a pale orange oil (144.6 mg, 63%): <sup>1</sup>H NMR (CDCl<sub>3</sub>, 500 MHz) δ 2.13-2.21 (m, 1 H, CH<sub>2</sub>), 2.62-2.77 (m, 3 H, CH<sub>2</sub>, CH<sub>2</sub>), 5.55-5.58 (m, 1 H, CH), 7.47 (d, *J* = 8.0 Hz, 2 H, ArH), 7.66 (d, *J* = 8.0 Hz, 2 H, ArH); <sup>13</sup>C NMR (CDCl<sub>3</sub>, 125 MHz) δ 28.6, 30.9, 80.1, 123.8 (*J*<sub>C-F</sub> = 272.0 Hz), 125.4, 125.7 (*J*<sub>C-F</sub> = 3.9 Hz), 130.6 (*J*<sub>C-F</sub> = 32.6 Hz), 143.4, 176.4; IR (ATR) 1782 s; MS (EI) *m/z* (%) 230 (M<sup>+</sup>, 52), 58 (100); HRMS (FAB-Magnetic Sector): calcd. for C<sub>11</sub>H<sub>10</sub>O<sub>2</sub>F<sub>3</sub> [M+H]<sup>+</sup>: 231.0627, found: 231.0633.

### 5-(1,1'-Biphenyl)-4-yl-dihydro-furan-2-one<sup>10</sup> (**2n**)

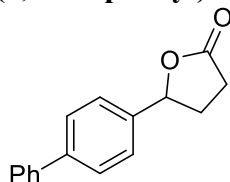

General procedure was followed with 4-([1,1'-biphenyl]-4-yl)-4-oxobutanoic acid (**1n**, 254.6 mg) for 24 h. Column chromatography (7/3 = hexane/EtOAc) afforded **2n** as a pale yellow solid (171.0 mg, 72%): mp 103–105 °C; <sup>1</sup>H NMR (CDCl<sub>3</sub>, 500 MHz) δ 2.19-2.29 (m, 1 H, CH<sub>2</sub>), 2.66-2.72 (m, 3 H, CH<sub>2</sub>, CH<sub>2</sub>), 5.54-5.57 (m, 1 H, CH), 7.35-7.46 (m, 5 H, ArH), 7.58-7.62 (m, 2 H, ArH); <sup>13</sup>C NMR (CDCl<sub>3</sub>, 125 MHz) δ 29.0, 30.9, 81.0, 125.8, 127.1, 127.5, 127.5, 128.8, 138.3, 140.4, 141.4, 176.8; IR (ATR, cm<sup>-1</sup>) 1766 s; MS (EI) *m/z* (%) 238 (M<sup>+</sup>, 100); HRMS (EI-Quadrupole): calcd. for C<sub>16</sub>H<sub>14</sub>O<sub>2</sub> [M]<sup>+</sup>: 238.0994, found: 238.1000.

### 5-Naphthalen-1-yl-dihydro-furan-2-one (**2o**)

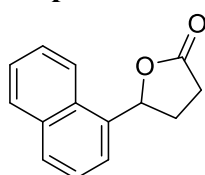

General procedure was followed with 4-(1-naphthyl)-4-oxobutanoic acid (**1o**, 228.3 mg) for 24 h.

Column chromatography (7/3 = hexane/EtOAc) afforded **2o** as a colorless oil (165.4 mg, 78%): <sup>1</sup>H NMR (CDCl<sub>3</sub>, 500 MHz) δ 2.23-2.31 (m, 1 H, CH<sub>2</sub>), 2.60-2.73 (m, 2 H, CH<sub>2</sub>), 2.83-2.91 (m, 1 H, CH<sub>2</sub>), 6.23-6.26 (m, 1 H, CH), 7.45-7.56 (m, 4 H, ArH), 7.81-7.90 (m, 3 H, ArH); <sup>13</sup>C NMR (CDCl<sub>3</sub>, 125 MHz) δ 28.2, 29.9, 78.6, 121.5, 122.4, 125.3, 125.9, 126.5, 128.7, 129.1, 129.4, 133.7, 135.0, 177.1; IR (ATR, cm<sup>-1</sup>) 1774 s; MS (EI) *m/z* (%) 212 (M<sup>+</sup>, 100); HRMS (EI-Quadrupole): calcd. for C<sub>14</sub>H<sub>12</sub>O<sub>2</sub> [M]<sup>+</sup>: 212.0837, found: 212.0835.

#### 5-Phenethyldihydrofuran-2(3H)-one<sup>11</sup> (**4**)

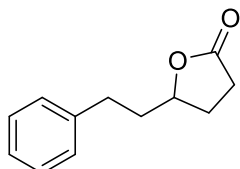

General procedure was followed with  $\gamma$ -oxo-benzenehexanoic acid (**3**, 206.6 mg) for 24 h. Column chromatography (7/3 = hexane/EtOAc) afforded **4** as a colorless oil (181.8 mg, 96%): <sup>1</sup>H NMR (CDCl<sub>3</sub>, 500 MHz) δ 1.83-1.95 (m, 2 H, CH<sub>2</sub>), 2.01-2.09 (m, 1 H, CH<sub>2</sub>), 2.27-2.34 (m, 1 H, CH<sub>2</sub>), 2.51-2.55 (m, 2 H, CH<sub>2</sub>), 2.70-2.76 (m, 1 H, CH<sub>2</sub>), 2.80-2.86 (m, 1 H, CH<sub>2</sub>), 4.44-4.50 (m, 1 H, CH), 7.19-7.22 (m, 3 H, ArH), 7.28-7.31 (m, 2 H, ArH); <sup>13</sup>C NMR (CDCl<sub>3</sub>, 125 MHz) δ 27.9, 28.8, 31.6, 37.3, 79.8, 126.1, 128.4, 128.5, 140.7, 177.1; IR (ATR, cm<sup>-1</sup>) 1770 s; MS (EI) *m/z* (%) 190 (M<sup>+</sup>, 51), 130 (100); HRMS (EI-Quadrupole): calcd. for C<sub>12</sub>H<sub>14</sub>O<sub>2</sub> [M]<sup>+</sup>: 190.0994, found: 190.0994.

#### 3-Phenylisobenzofuran-1-one<sup>12</sup> (**6**)

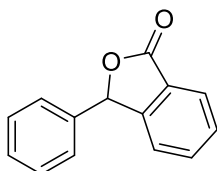

General procedure was followed with 2-benzoylbenzoic acid (**5**, 226.1 mg) for 24 h. Column chromatography (9/1 = hexane/EtOAc) afforded **6** as a white solid (103.9 mg, 49%): mp 116–117 °C; <sup>1</sup>H NMR (CDCl<sub>3</sub>, 500 MHz) δ 6.41 (s, 1 H, CH), 7.27-7.39 (m, 6 H, ArH), 7.56 (t, *J* = 7.5 Hz, 1 H, ArH), 7.63 (t, *J* = 7.5 Hz, 1 H, ArH), 7.96 (d, *J* = 7.5 Hz, 1 H, ArH); <sup>13</sup>C NMR (CDCl<sub>3</sub>, 125 MHz) δ 82.7, 122.8, 125.6, 125.6, 126.9, 128.9, 128.9, 129.3, 129.3, 134.3, 136.4, 149.6, 170.5; IR (ATR, cm<sup>-1</sup>) 1746 s; MS (EI) *m/z* (%) 210 (M<sup>+</sup>, 85) 105 (100); HRMS (EI-Quadrupole): calcd. for C<sub>14</sub>H<sub>10</sub>O<sub>2</sub> [M]<sup>+</sup>: 210.0681, found: 210.0689.

#### 4-(4-Methoxyphenyl)butanoic acid<sup>13</sup> (**2g'**)

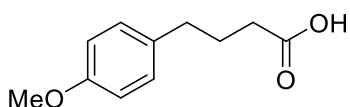

General procedure was followed with 3-(4-methoxybenzoyl)propionic acid (**1g**, 208.2 mg) for 24 h. Column chromatography (7/3 = hexane/EtOAc) afforded **2g'** as a white solid (41.0 mg, 21%): mp

57–59 °C  $^1\text{H}$  NMR ( $\text{CDCl}_3$ , 500 MHz)  $\delta$  1.93 (quint,  $J = 7.5$  Hz, 2 H,  $\text{CH}_2$ ), 2.36 (t,  $J = 7.5$  Hz, 2 H,  $\text{CH}_2$ ), 2.61 (t,  $J = 7.5$  Hz, 2 H,  $\text{CH}_2$ ), 6.83 (d,  $J = 8.5$  Hz, 2 H, ArH), 7.10 (d,  $J = 8.5$  Hz, 2 H, ArH);  $^{13}\text{C}$  NMR ( $\text{CDCl}_3$ , 125 MHz)  $\delta$  26.4, 33.2, 34.0, 55.2, 113.8, 129.4, 133.2, 157.9, 179.7; IR (ATR,  $\text{cm}^{-1}$ ) 1694 s; MS (EI)  $m/z$  (%) 194 ( $\text{M}^+$ , 33), 121 (100); HRMS (EI-Quadrupole): calcd. for  $\text{C}_{11}\text{H}_{14}\text{O}_3$  [ $\text{M}$ ] $^+$ : 190.0943, found: 190.0947.

#### 4-(4-Phenoxyphenyl)butanoic acid<sup>14</sup> (**2h'**)

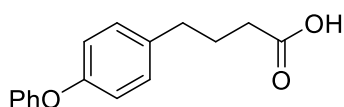

General procedure was followed with 3-(4-phenoxybenzoyl)propionic acid (**1h**, 270.1 mg) for 24 h. Column chromatography (7/3 = hexane/EtOAc) afforded **2h'** as a white solid (11.3 mg, 4%): mp 41–43 °C;  $^1\text{H}$  NMR ( $\text{CDCl}_3$ , 500 MHz)  $\delta$  1.96 (quint,  $J = 7.5$  Hz, 2 H,  $\text{CH}_2$ ), 2.39 (t,  $J = 7.5$  Hz, 2 H,  $\text{CH}_2$ ), 2.61 (t,  $J = 7.5$  Hz, 2 H,  $\text{CH}_2$ ), 6.94 (d,  $J = 8.0$  Hz, 2 H, ArH), 6.99 (dd,  $J = 9.0$  Hz, 1.0 Hz 2 H, ArH), 7.08 (t,  $J = 8.0$  Hz, 1 H, ArH), 7.14 (d,  $J = 9.0$  Hz, 2 H, ArH), 7.32 (dd,  $J = 8.0$  Hz, 1.0 Hz 2 H, ArH);  $^{13}\text{C}$  NMR ( $\text{CDCl}_3$ , 125 MHz)  $\delta$  26.3, 33.2, 34.2, 118.6, 119.0, 123.0, 129.7, 136.1, 155.4, 157.5, 179.4; IR (ATR,  $\text{cm}^{-1}$ ) 1690 s; MS (EI)  $m/z$  (%) 256 ( $\text{M}^+$ , 41), 183 (100); HRMS (EI-Quadrupole): calcd. for  $\text{C}_{16}\text{H}_{16}\text{O}_3$  [ $\text{M}$ ] $^+$ : 256.10995, found: 256.10940.

#### (*E*)-5-Phenylpent-4-enoic acid<sup>15</sup> (**8**)

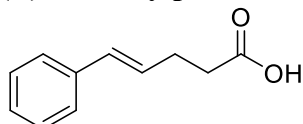

General procedure was followed with 5-oxo-5-phenylpentanoic acid (**7**, 192.3 mg) for 24 h. Column chromatography (7/3 = hexane/EtOAc) afforded **8'** as a white solid (12.0 mg, 8%): mp 88–90 °C;  $^1\text{H}$  NMR ( $\text{CDCl}_3$ , 500 MHz)  $\delta$  2.55 (m, 4 H,  $\text{CH}_2$ ), 6.18–6.24 (m, 1 H, CH), 6.45 (d,  $J = 16.0$  Hz, 1 H, CH), 7.21 (t,  $J = 7.5$  Hz, 1 H, ArH), 7.29 (t,  $J = 7.5$  Hz, 2 H, ArH), 7.34 (d,  $J = 7.5$  Hz, 2 H, ArH);  $^{13}\text{C}$  NMR ( $\text{CDCl}_3$ , 125 MHz)  $\delta$  27.9, 33.7, 126.1, 127.2, 128.0, 128.5, 131.2, 137.2, 178.9; IR (ATR,  $\text{cm}^{-1}$ ) 1694 s; MS (EI)  $m/z$  (%) 176 ( $\text{M}^+$ , 39), 117 (100); HRMS (EI-Quadrupole): calcd. for  $\text{C}_{11}\text{H}_{12}\text{O}_2$  [ $\text{M}$ ] $^+$ : 176.0837, found: 176.0838.

#### 6-Phenyltetrahydro-2H-pyran-2-one<sup>10</sup> (**9**)

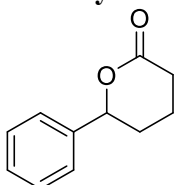

General procedure was followed with 5-oxo-5-phenylpentanoic acid (**7**, 192.6 mg) and triethylsilane for 4 h. Column chromatography (7/3 = hexane/EtOAc) afforded **8** as a colorless oil (14.5 mg, 8%):  $^1\text{H}$  NMR ( $\text{CDCl}_3$ , 500 MHz)  $\delta$  1.83–1.90 (zm, 1 H,  $\text{CH}_2$ ), 1.97–2.02 (m, 2 H,  $\text{CH}_2$ ),

2.15-2.19 (m, 1 H,  $CH_2$ ), 2.55-2.61 (m, 1 H,  $CH_2$ ), 2.69-2.74 (m, 1 H,  $CH_2$ ), 2.51-2.55 (m, 2 H,  $CH_2$ ), 2.70-2.76 (m, 1 H,  $CH_2$ ), 2.80-2.86 (m, 1 H,  $CH_2$ ), 5.36 (dd, 1 H,  $J = 10.5, 3.5$  Hz,  $CH$ ), 7.31-7.40 (m, 5 H,  $ArH$ );  $^{13}C$  NMR ( $CDCl_3$ , 125 MHz)  $\delta$  18.6, 29.5, 30.5, 81.6, 125.7, 128.2, 128.6, 139.7, 171.3; IR (ATR,  $cm^{-1}$ ) 1732 s; MS (EI)  $m/z$  (%) 176 ( $M^+$ , 51), 104 (100); HRMS (EI-Quadrupole): calcd. for  $C_{11}H_{12}O_2 [M]^+$ : 176.0837, found: 176.0834.

### 2-Phenyltetrahydropyran<sup>16</sup> (9')

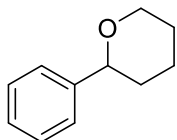

General procedure was followed with 5-oxo-5-phenylpentanoic acid (7, 192.6 mg) and triethylsilane for 4 h. Gel permeation chromatography (chloroform) afforded **9'** as a colorless oil (34.6 mg, 21%):  $^1H$  NMR ( $CDCl_3$ , 500 MHz)  $\delta$  1.57-1.72 (m, 5 H,  $CH_2$ ), 1.82-1.84 (m, 1 H,  $CH_2$ ), 1.93-1.95 (m, 1 H,  $CH_2$ ), 3.59-3.64 (m, 1 H,  $CH_2$ ), 4.12-4.15 (m, 1 H,  $CH_2$ ), 4.32 (dd,  $J = 11.0$  Hz, 2.0 Hz, 1 H,  $CH_2$ ), 7.23-7.25 (m, 1 H,  $ArH$ ), 7.31-7.36 (m, 4 H,  $ArH$ );  $^{13}C$  NMR ( $CDCl_3$ , 125 MHz)  $\delta$  24.0, 25.9, 34.0, 69.0, 80.1, 125.8, 127.2, 128.2, 143.3; MS (EI)  $m/z$  (%) 162 ( $M^+$ , 93), 105 (100); HRMS (EI-Quadrupole): calcd. for  $C_{11}H_{14}O [M]^+$ : 162.1045, found: 162.1042.

## References and Notes

1. N. Sakai, T. Kobayashi and Y. Ogiwara, *Chem. Lett.*, 2015, **44**, 1503.
2. E. L. Martin, *J. Am. Chem. Soc.*, 1936, **58**, 1438.
3. C. Liang, S. Pan, S. Yang, J. Wang, WO2016023877, 2016. *Chem. Abst.* 2016, **164**, 263746.
4. L. Milanos, R. Brox, T. Frank, G. Poklukar, R. Palmisano, R. Waibel, J. Einsiedel, M. Dürr, I. Ivanović-Burmazović, O. Larsen, G. M. Hjortø, M. M. Rosenkilde and N. Tschammer, *J. Med. Chem.*, 2016, **59**, 2222.
5. R.C. Reid, C. I. Clark, K. Hansford, M. J. Stoermer, R. P. McGeary, D. P. Fairlie, WO2002008189, 2002. *Chem Abstract.* 2002, **136**, 134497
6. A. S. K. Tsang, A. Kapat and F. Schoenebeck, *J. Am. Chem. Soc.*, 2016, **138**, 518.
7. Y. Su, Y.-Q. Tu and P. Gu, *Org. Lett.*, 2014, **16**, 4204.
8. N. O. Mahmoodi and M. Jazayri, *Synth. Commun.*, 2001, **31**, 1467.
9. R. Gao, R. Fan and D. J. Canney, *Synlett*, 2015, **26**, 661.
10. T. Dohi, N. Takenaga, A. Goto, A. Maruyama and Y. Kita, *Org. Lett.*, 2007, **9**, 3129.
11. C. Shu, M.-Q. Liu, Y.-Z. Sun and L.-W. Ye, *Org. Lett.*, 2012, **14**, 4958.
12. J. Karthikeyan, K. Parthasarathy and C.-H. Cheng, *Chem. Commun.*, 2011, **47**, 10461.
13. T. Ohishi, L. Zhang, M. Nishiura and Z. Hou, *Angew. Chem. Int. Ed.*, 2011, **50**, 8114.
14. M. Huang, *J. Am. Chem. Soc.*, 1946, **68**, 2487.
15. F. V. Singh and T. Wirth, *Org. Lett.*, 2011, **13**, 6504.
16. A. R. Katritzky, S. Rachwal and B. Rachwal, *J. Chem. Soc., Perkin Trans. 1*, 1990, 1717.

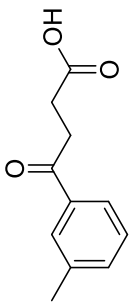

1c

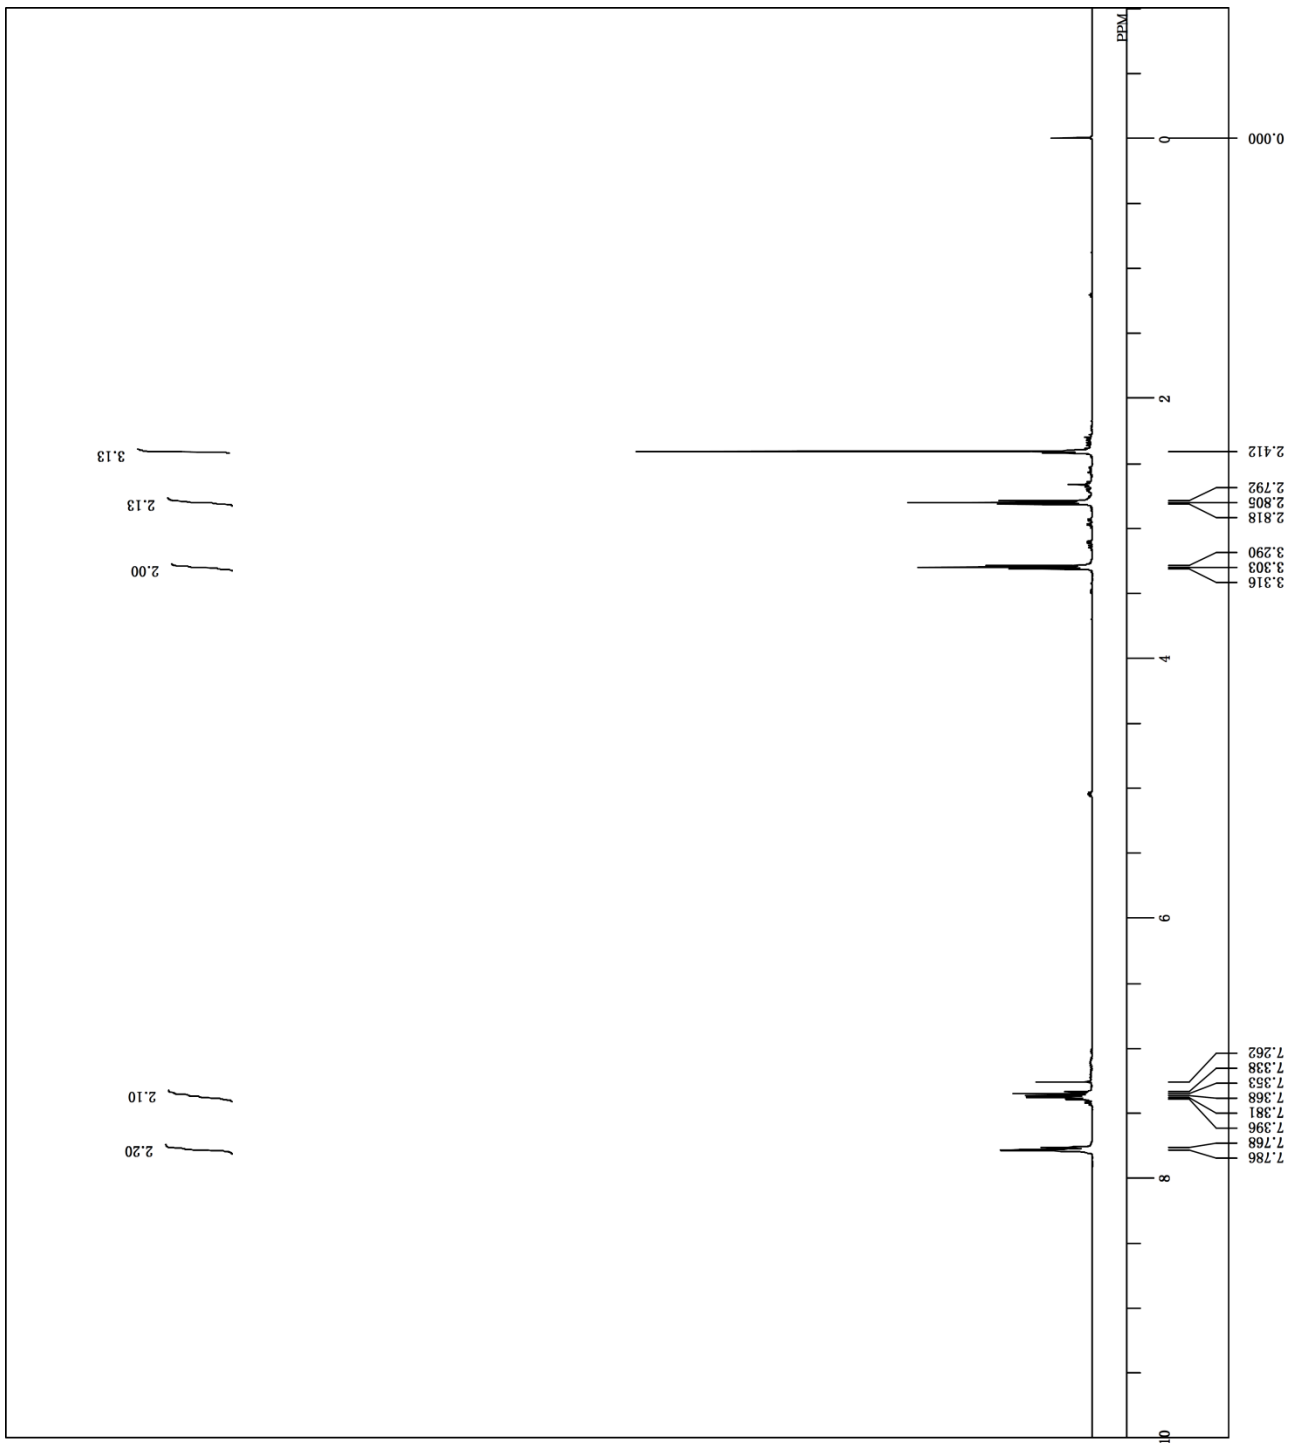





**1c**

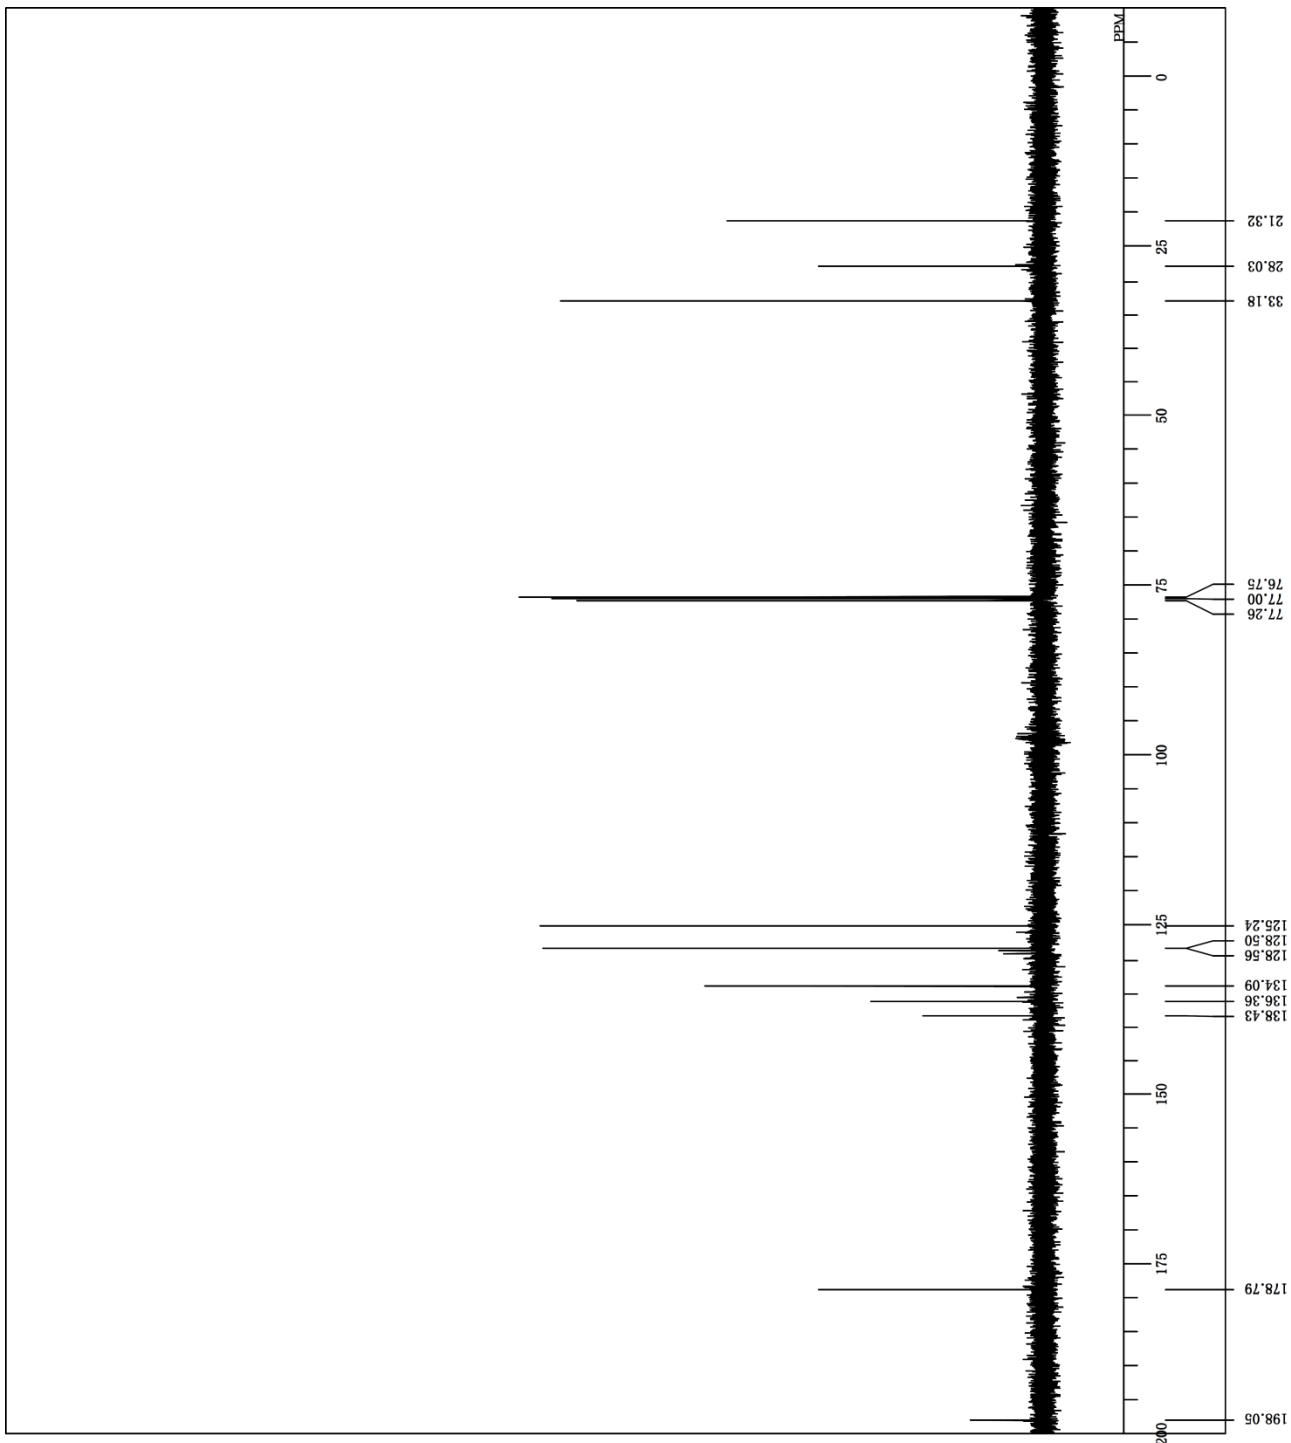

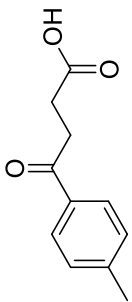

1d

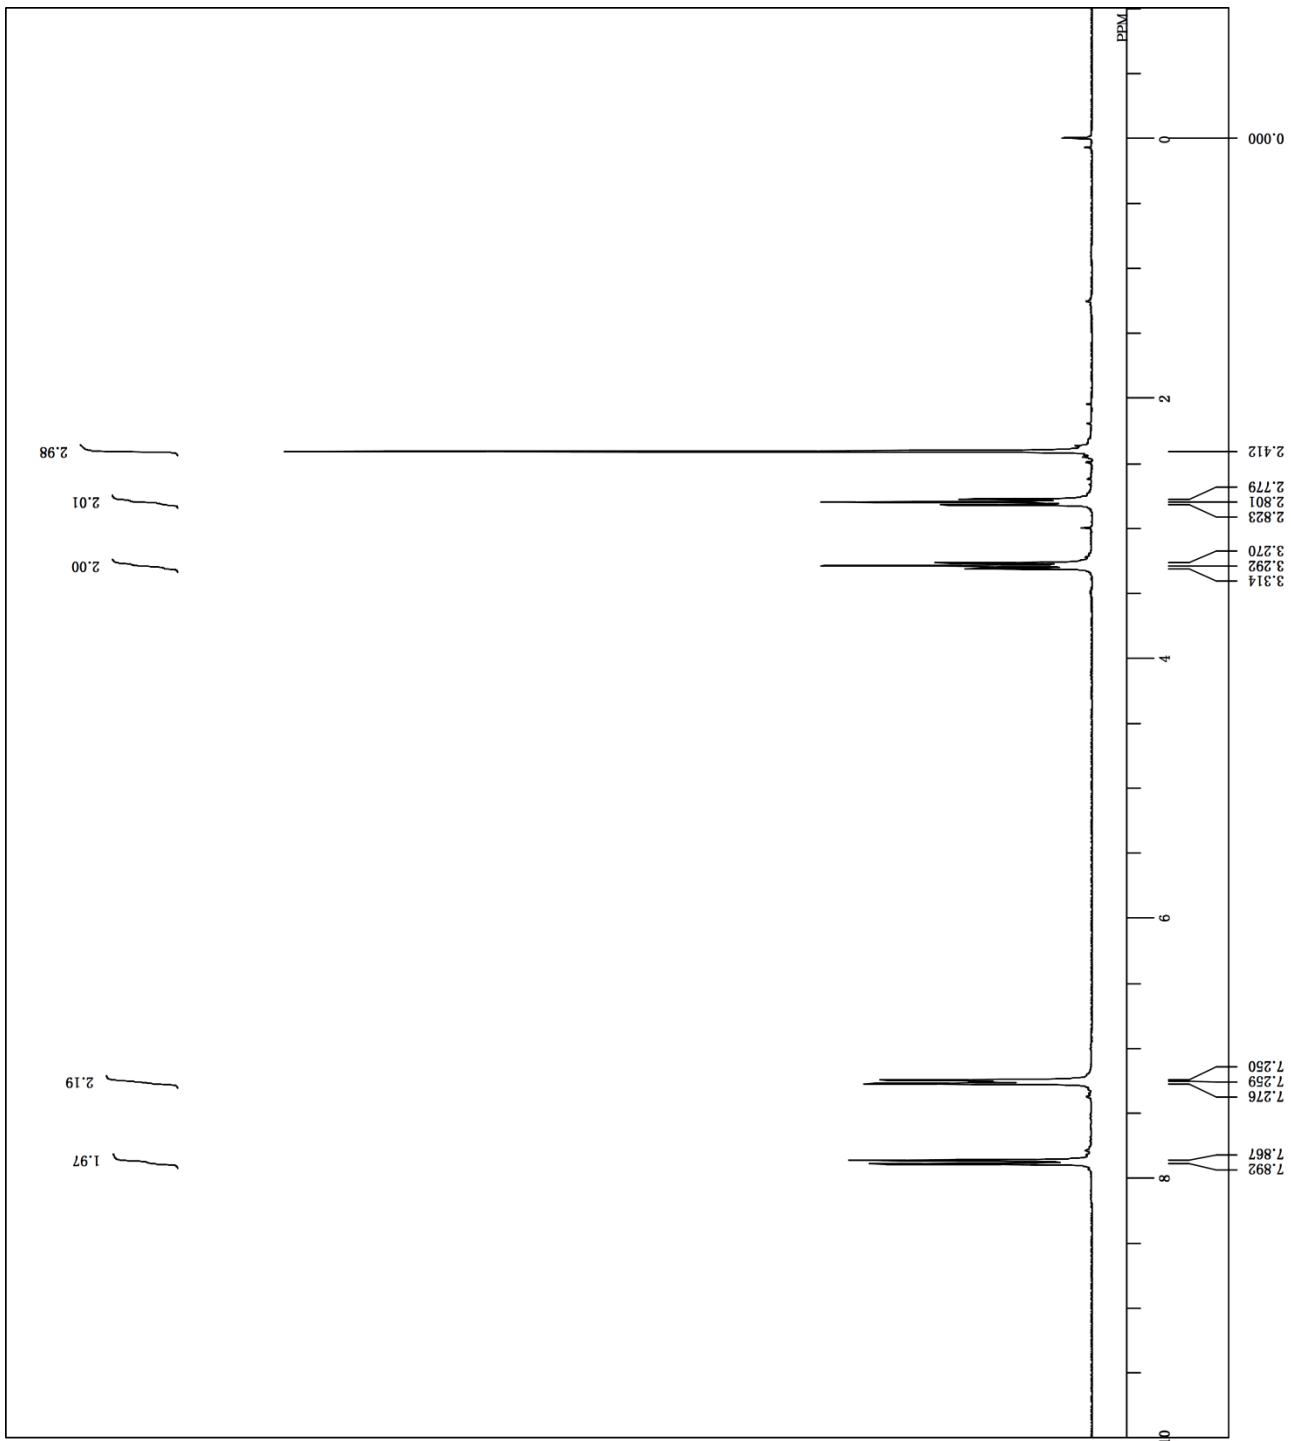



**1d**

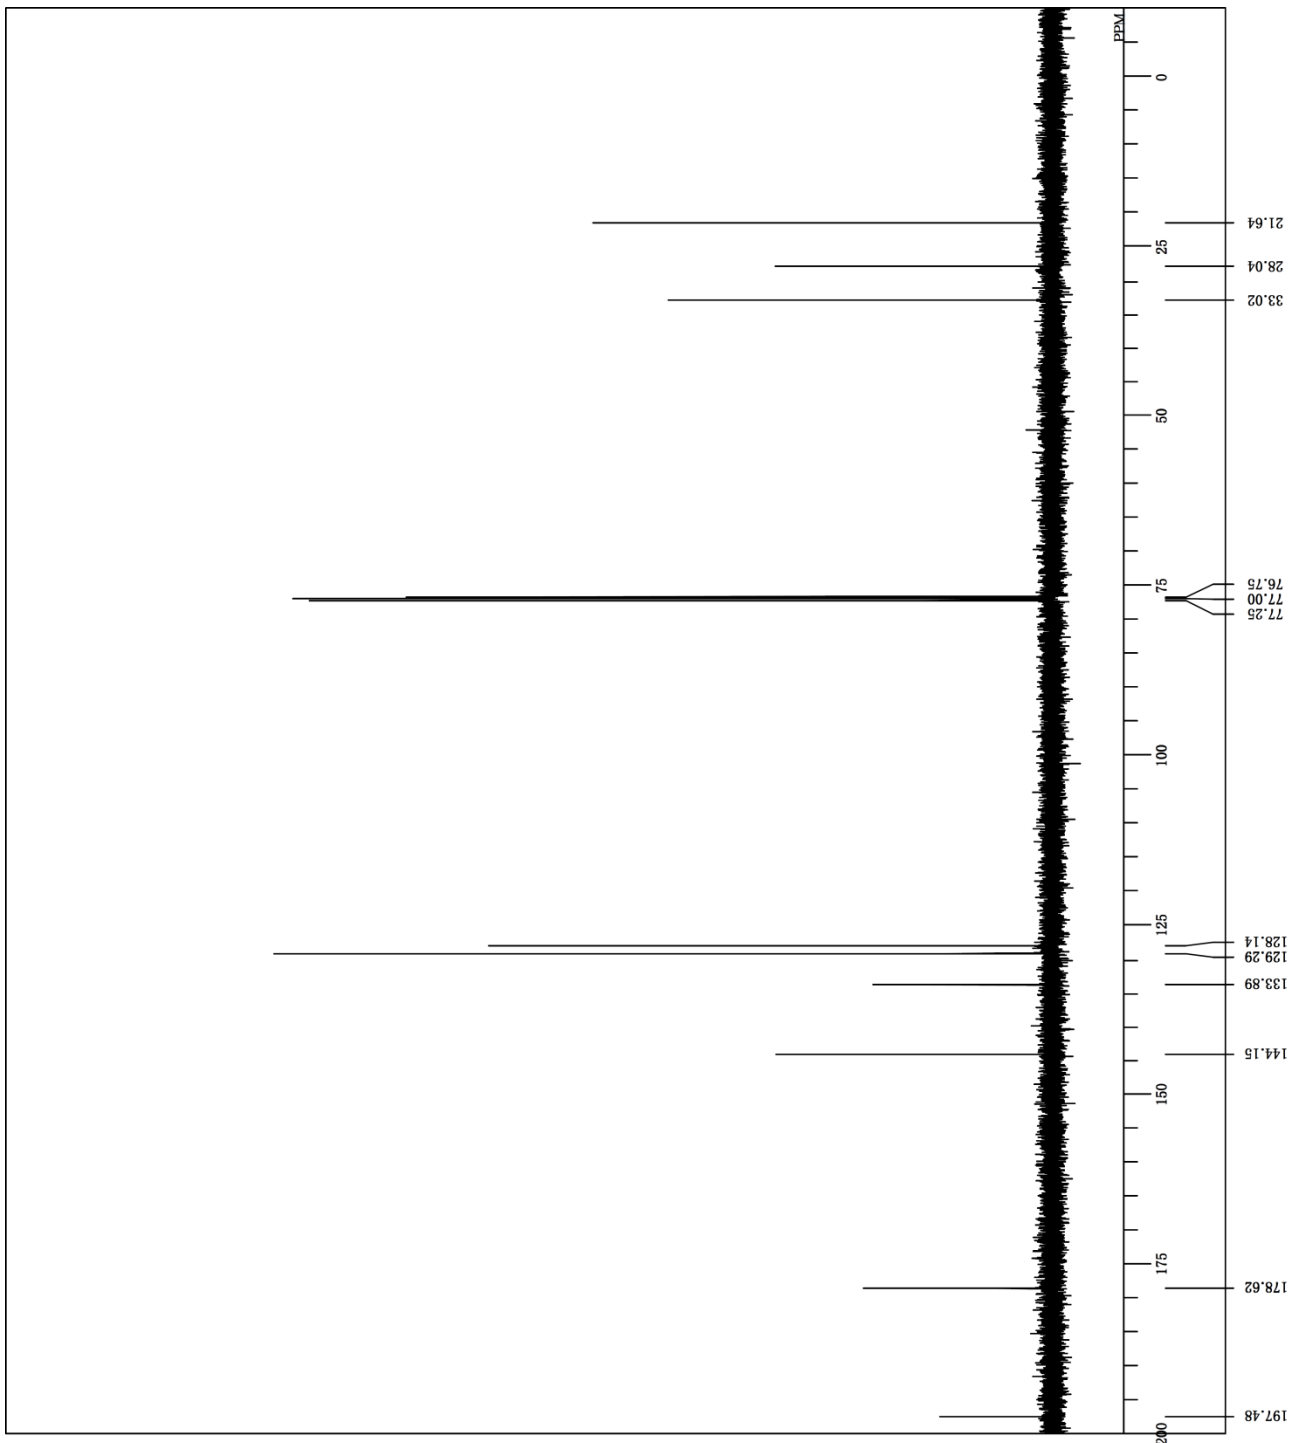

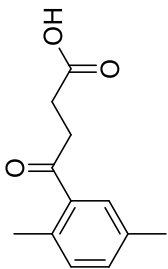

1e

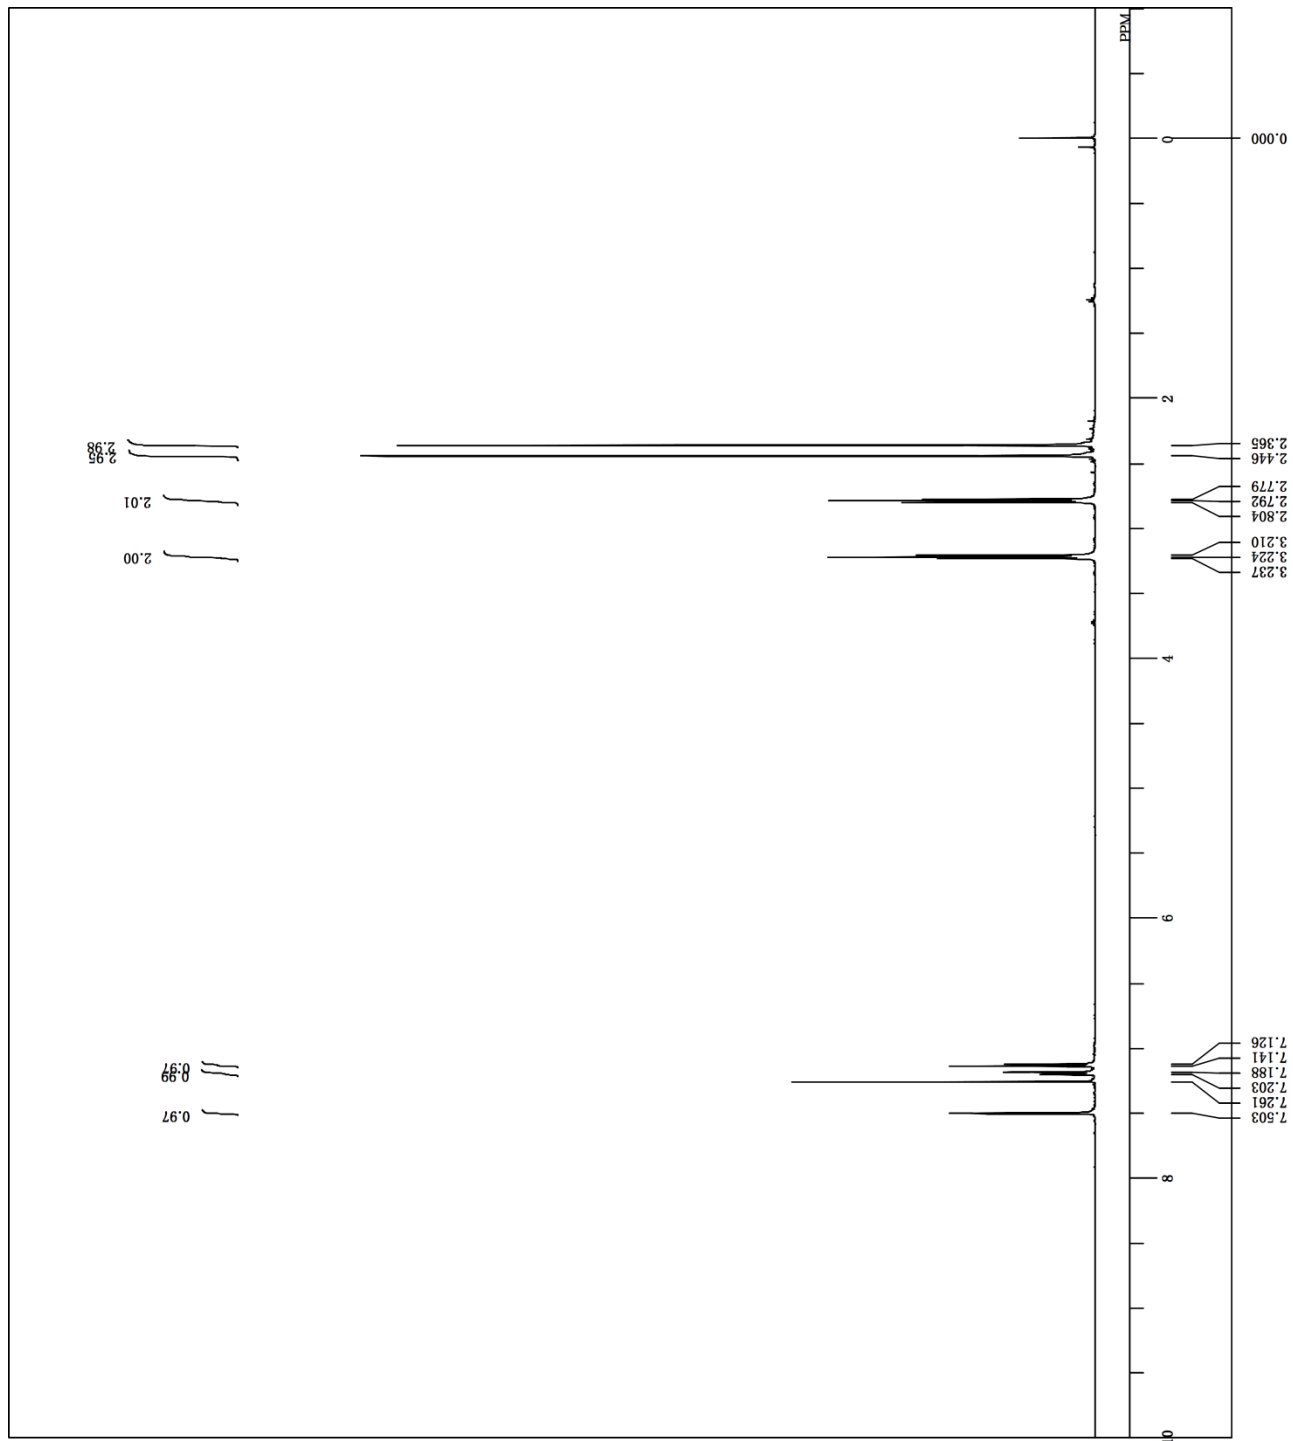



**1e**

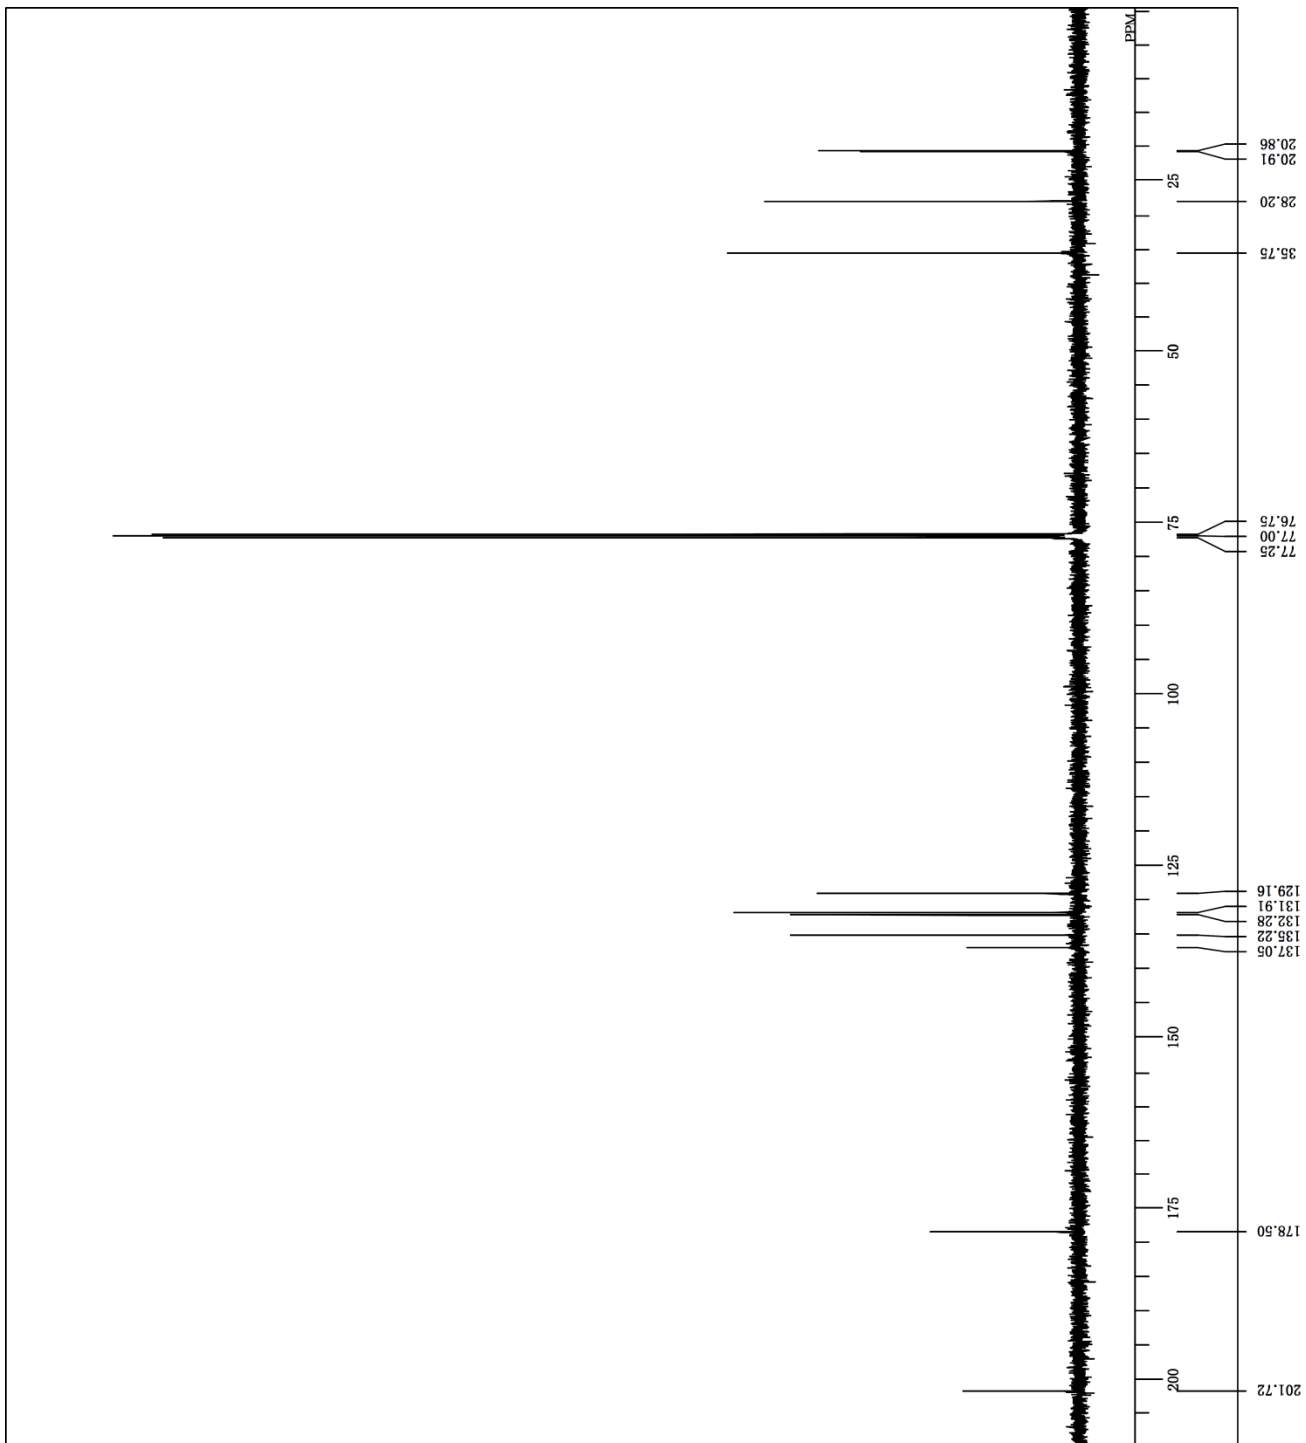

S21

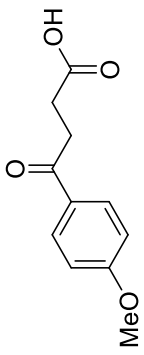

**1g**

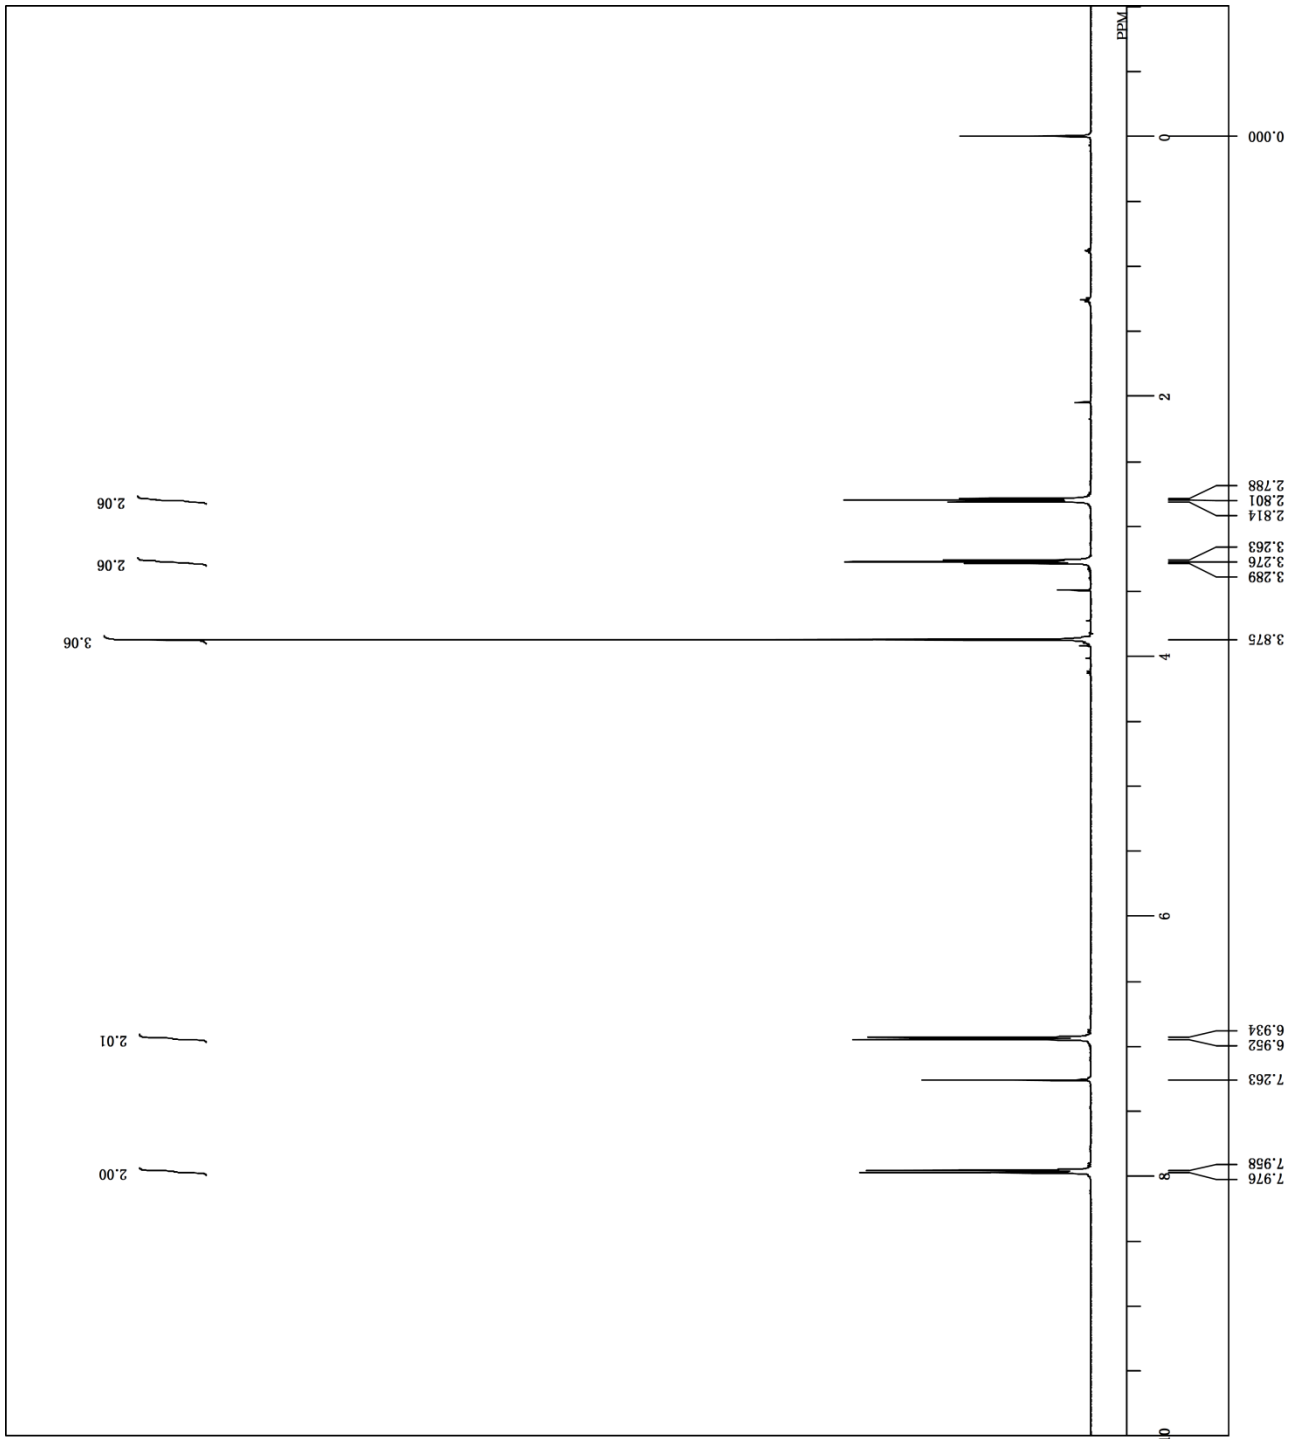



**1g**

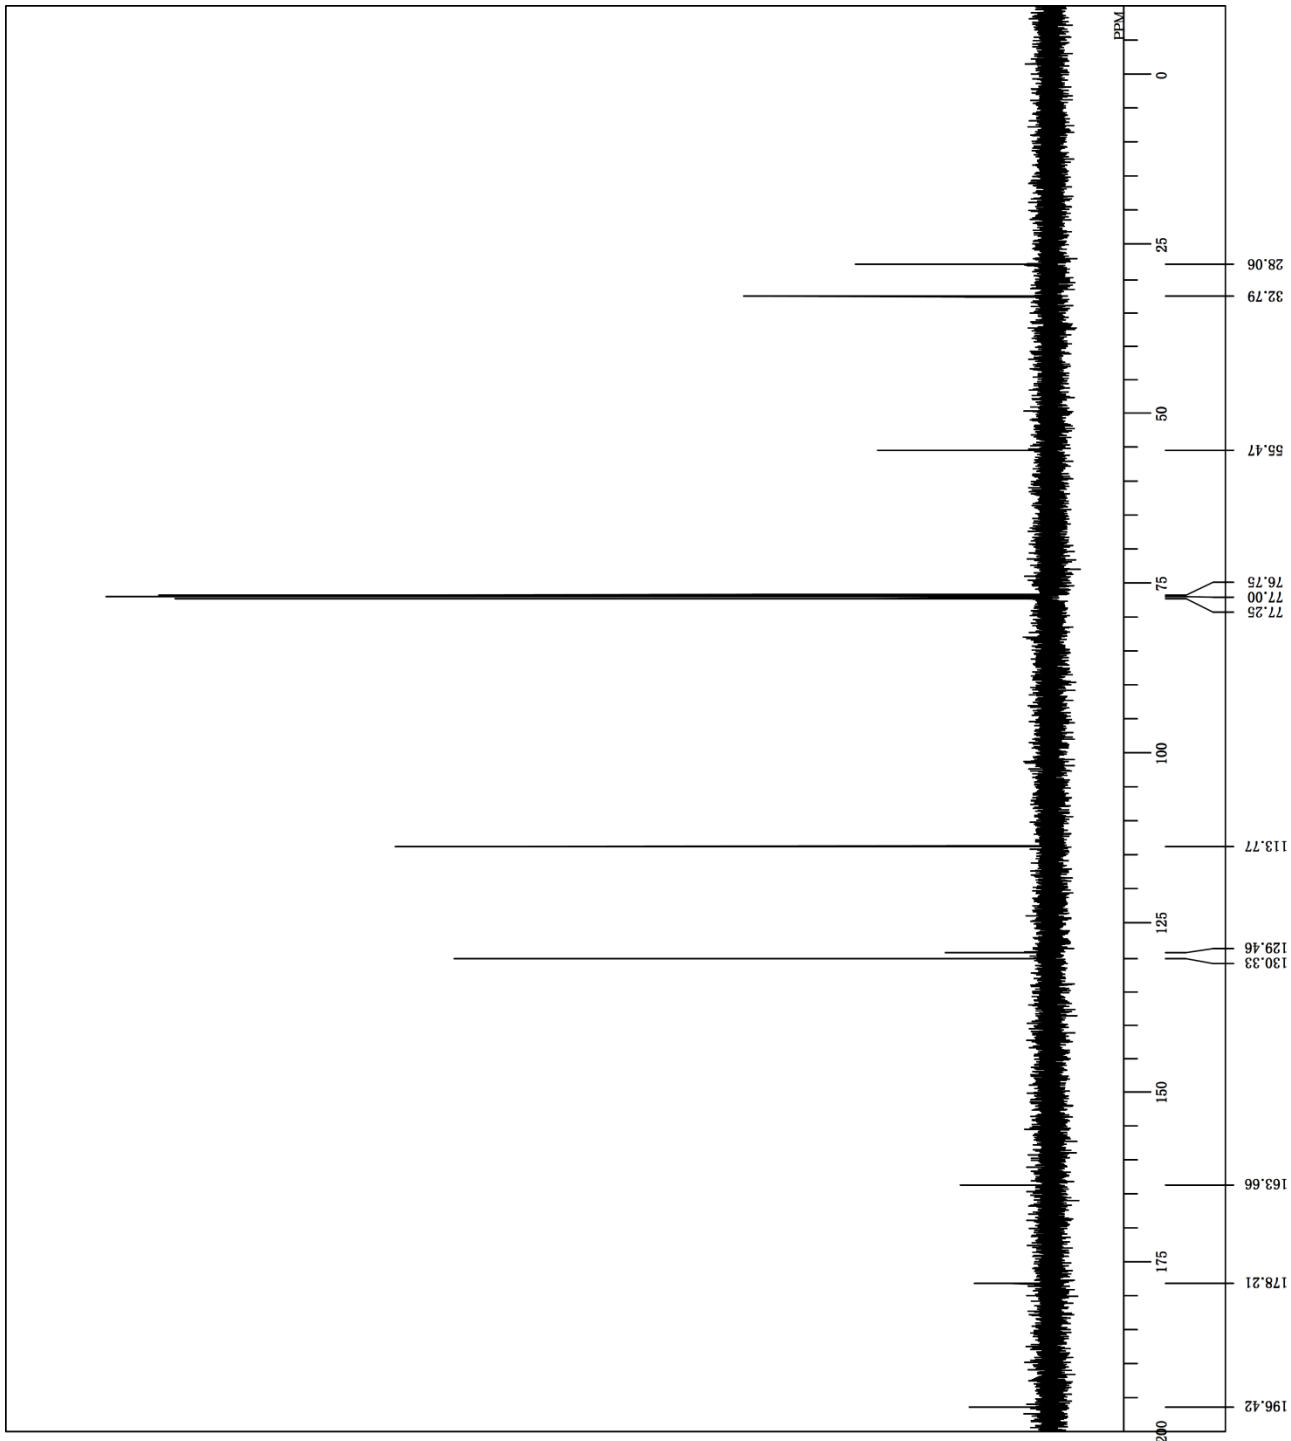

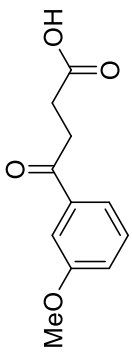

1i

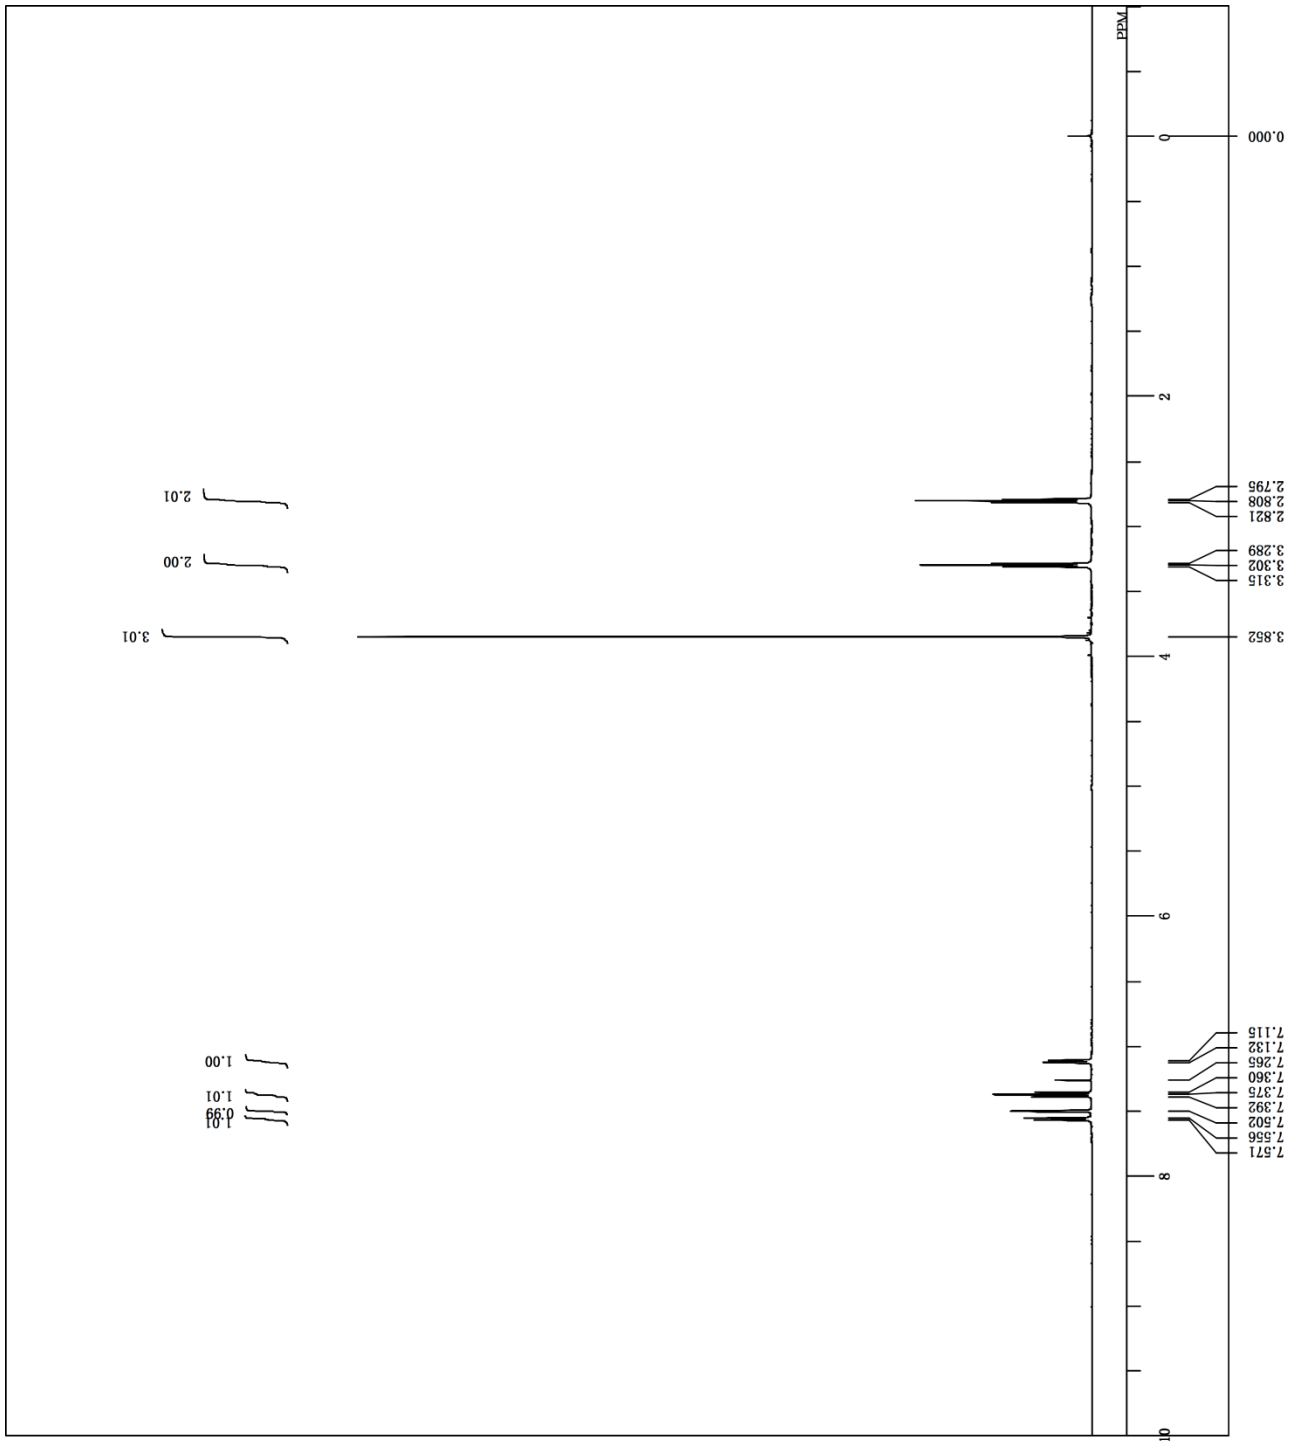



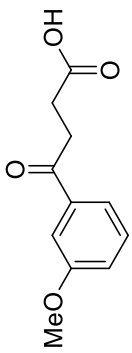

1i

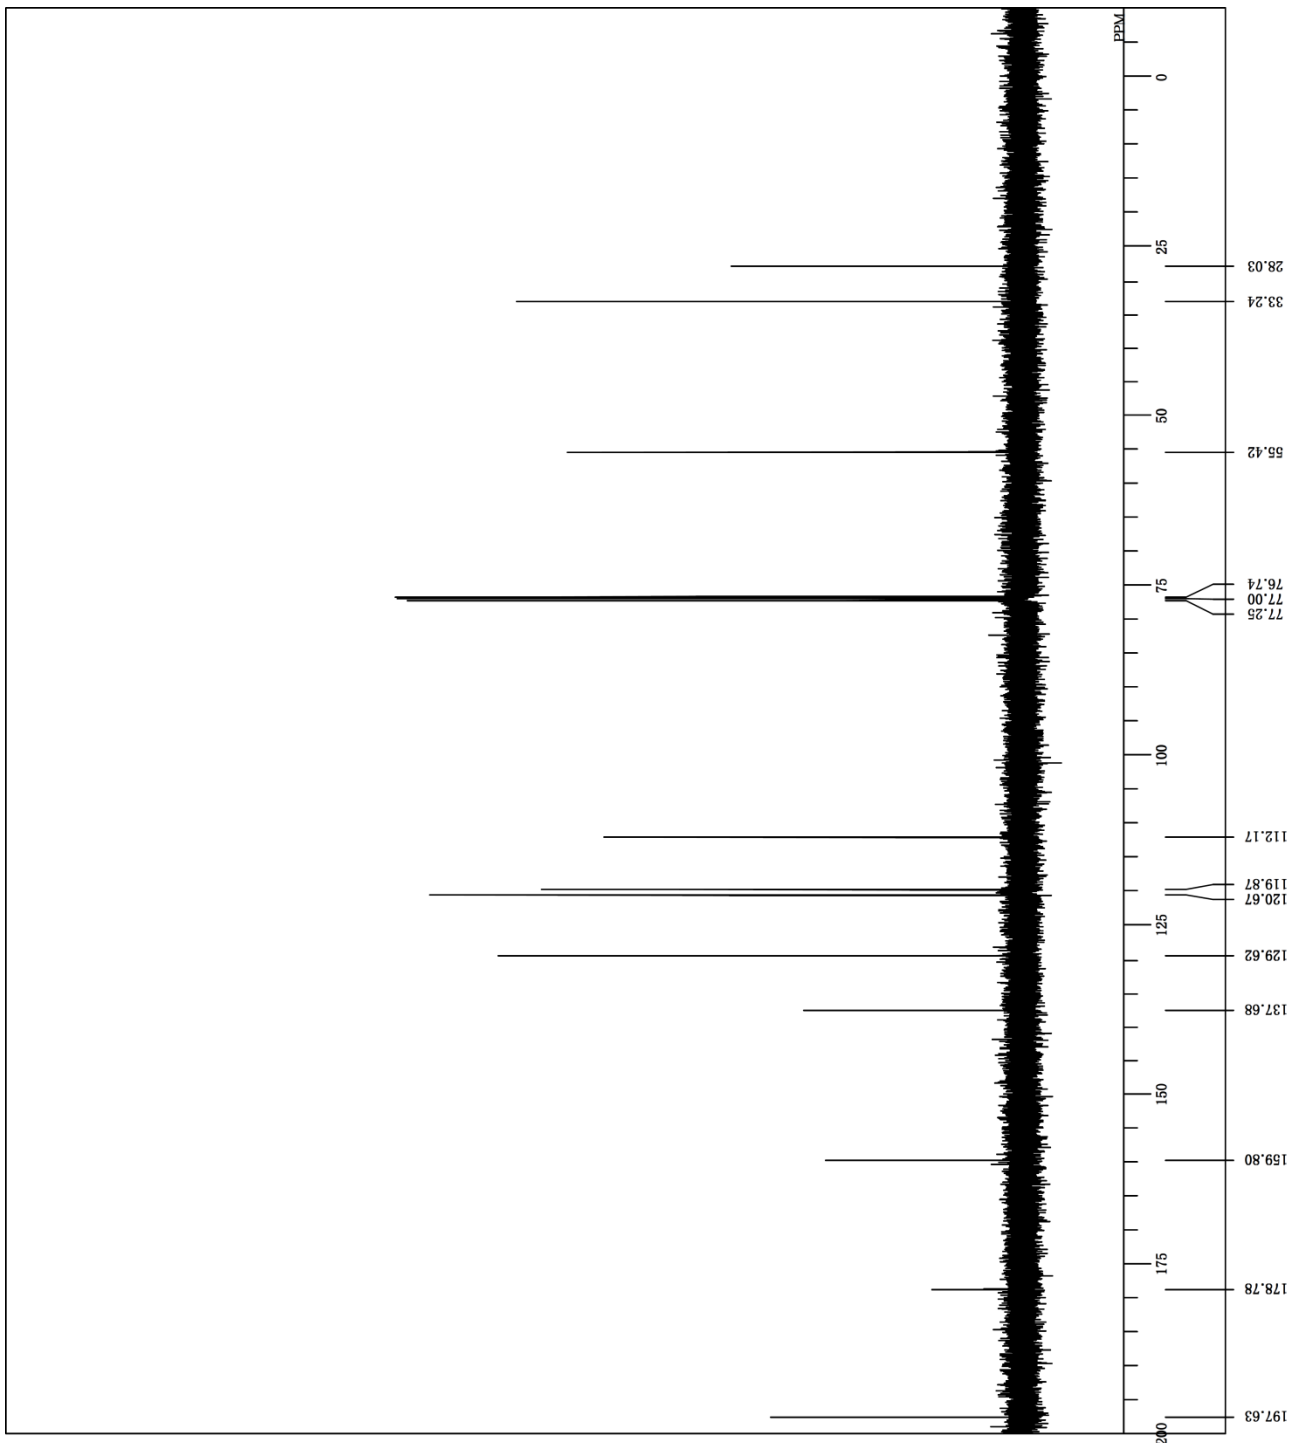

S25

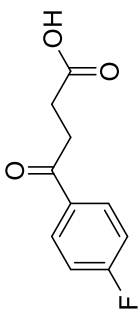

1j

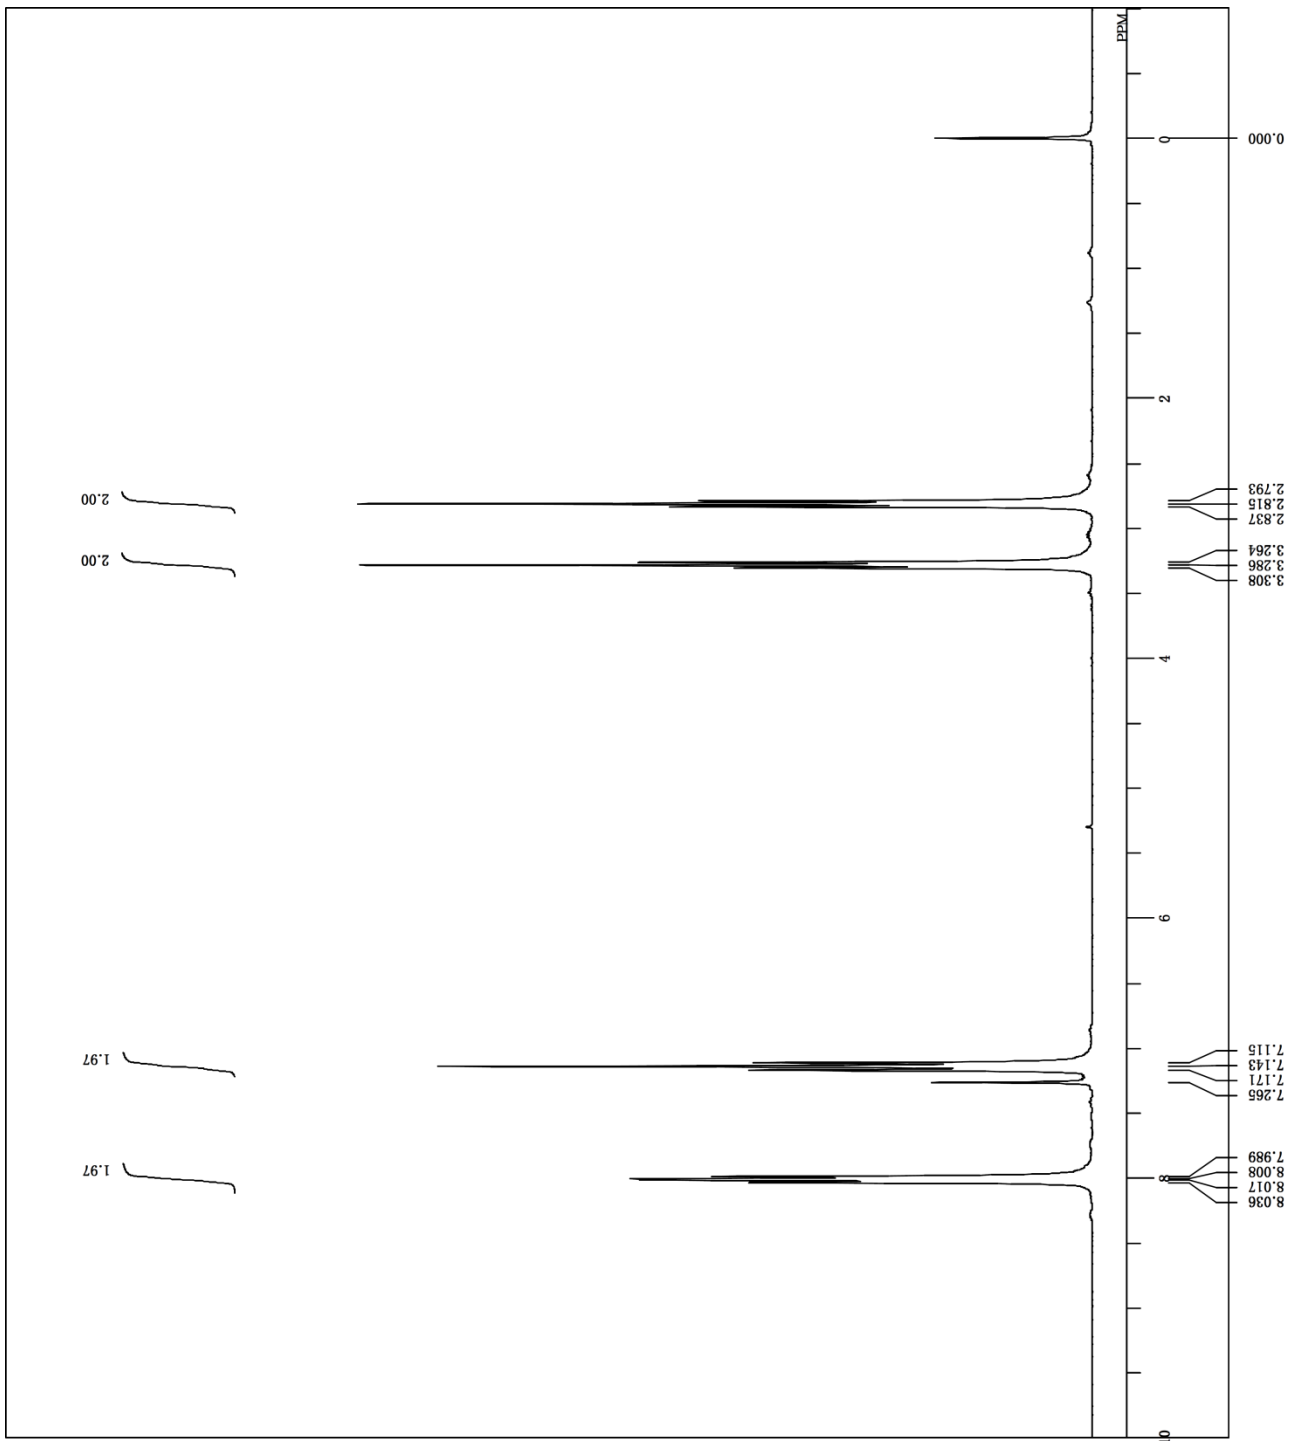

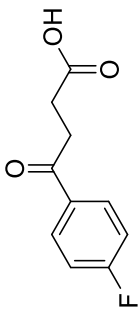

1j

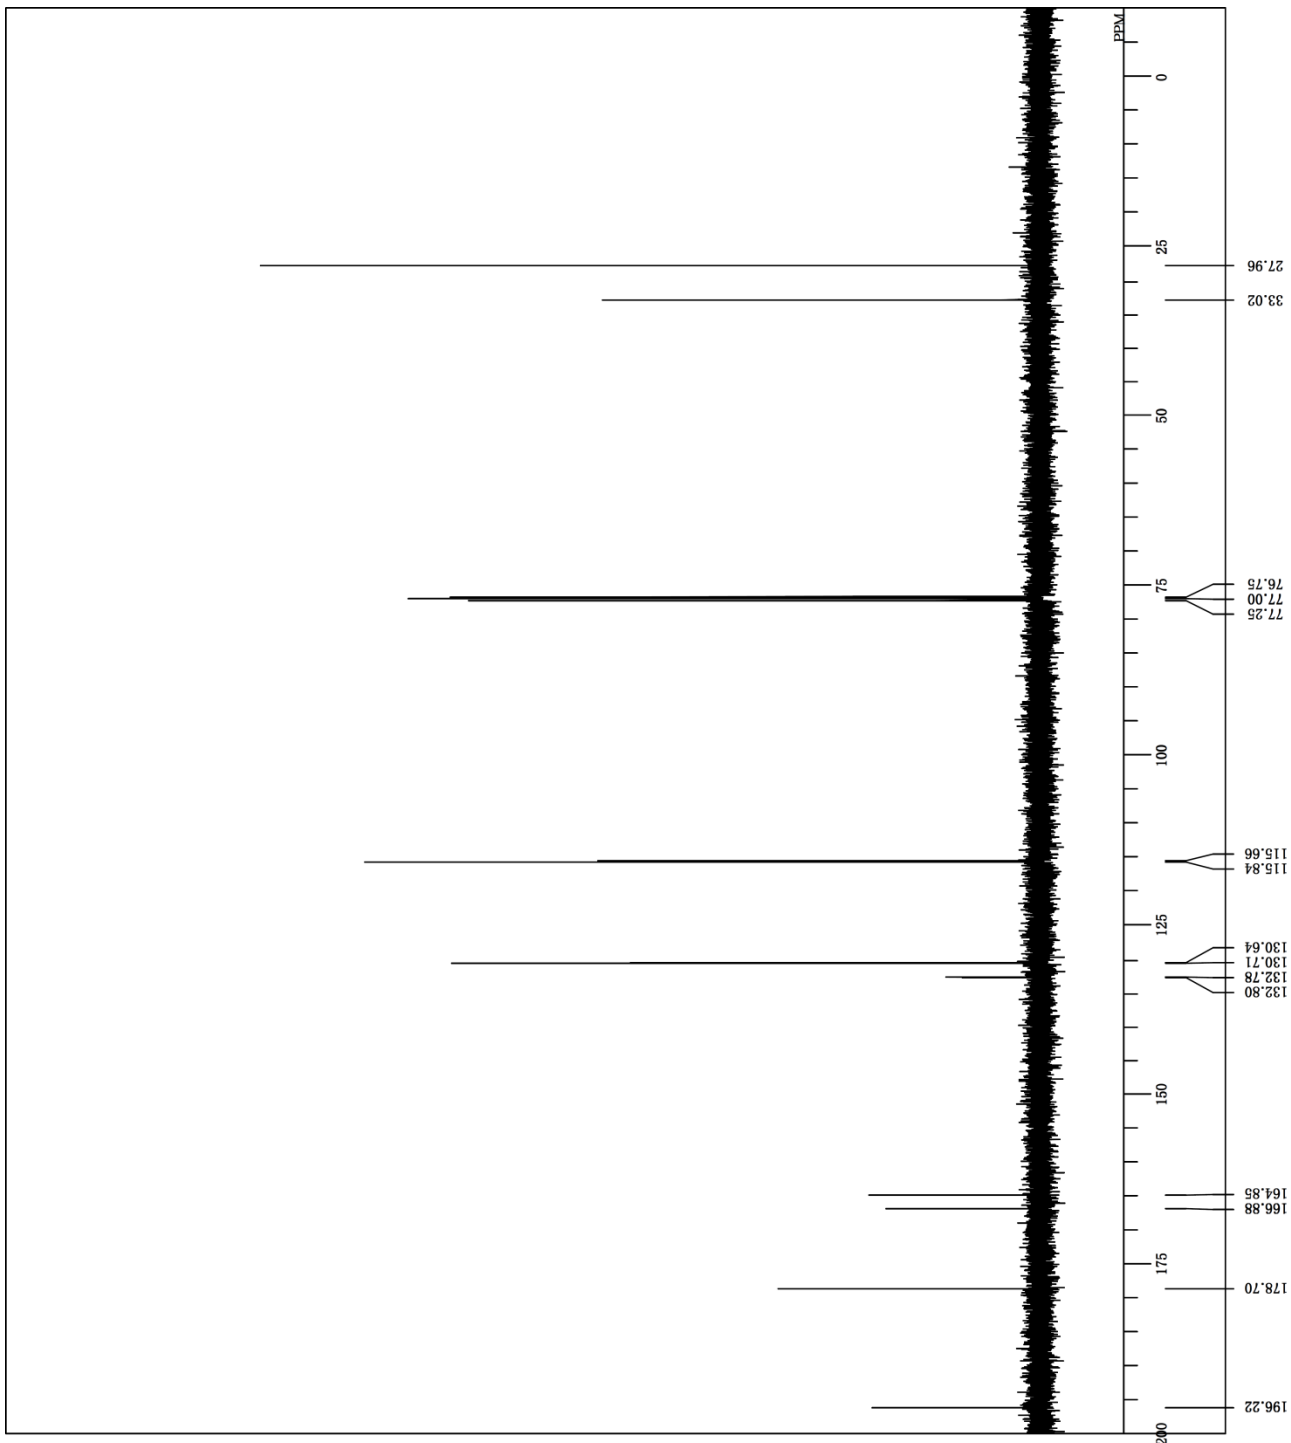

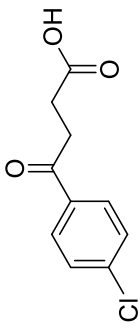

**1k**

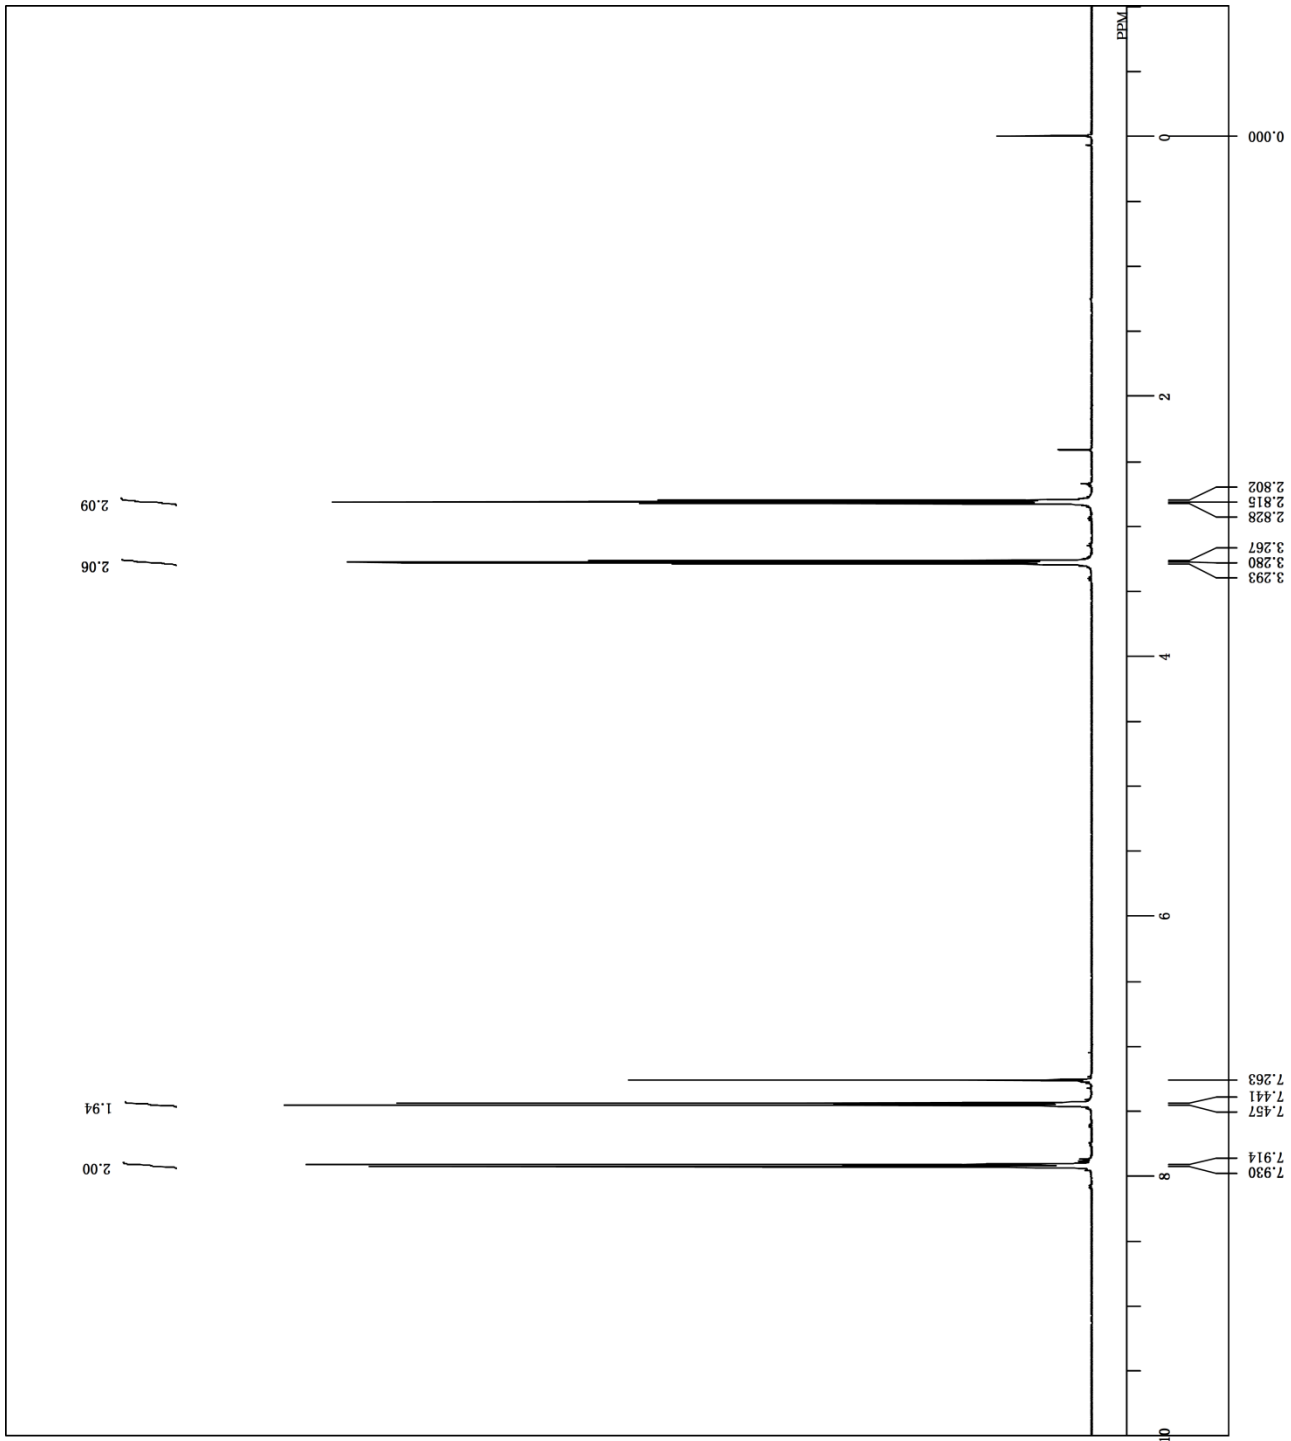



**1k**

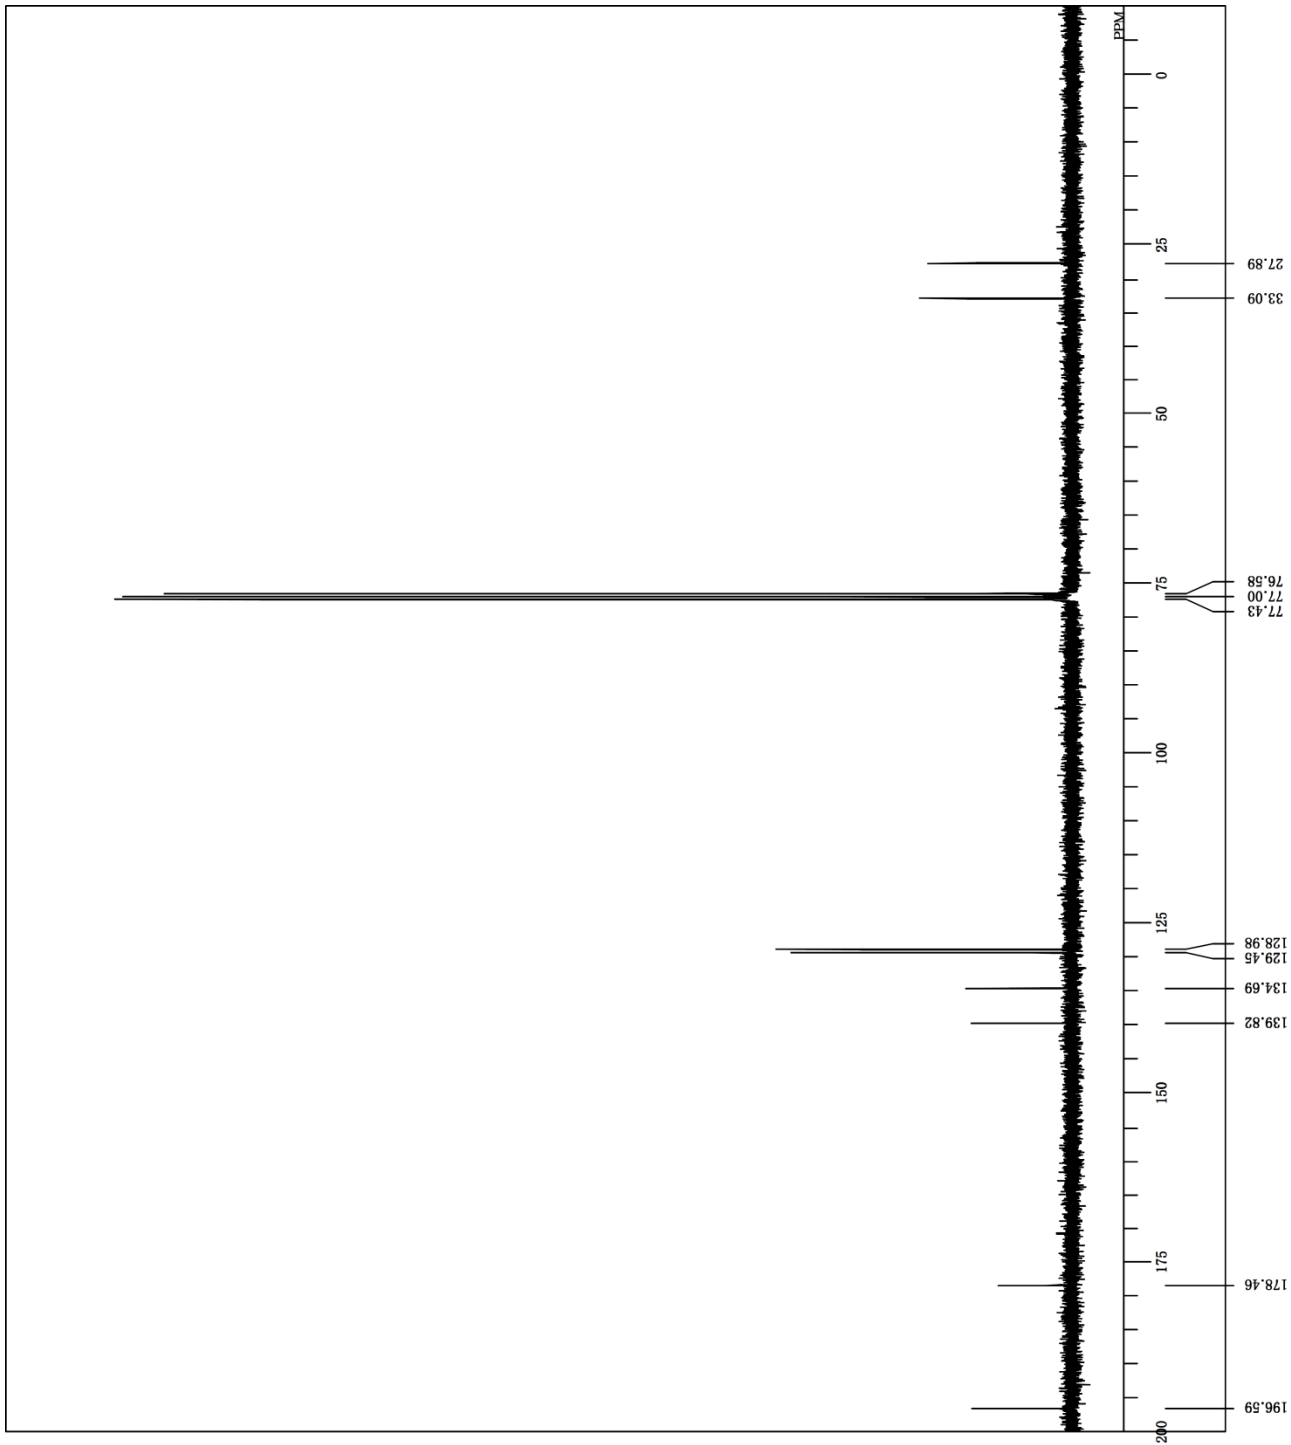

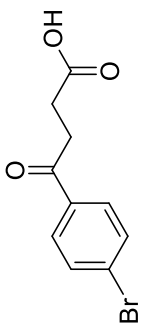

11

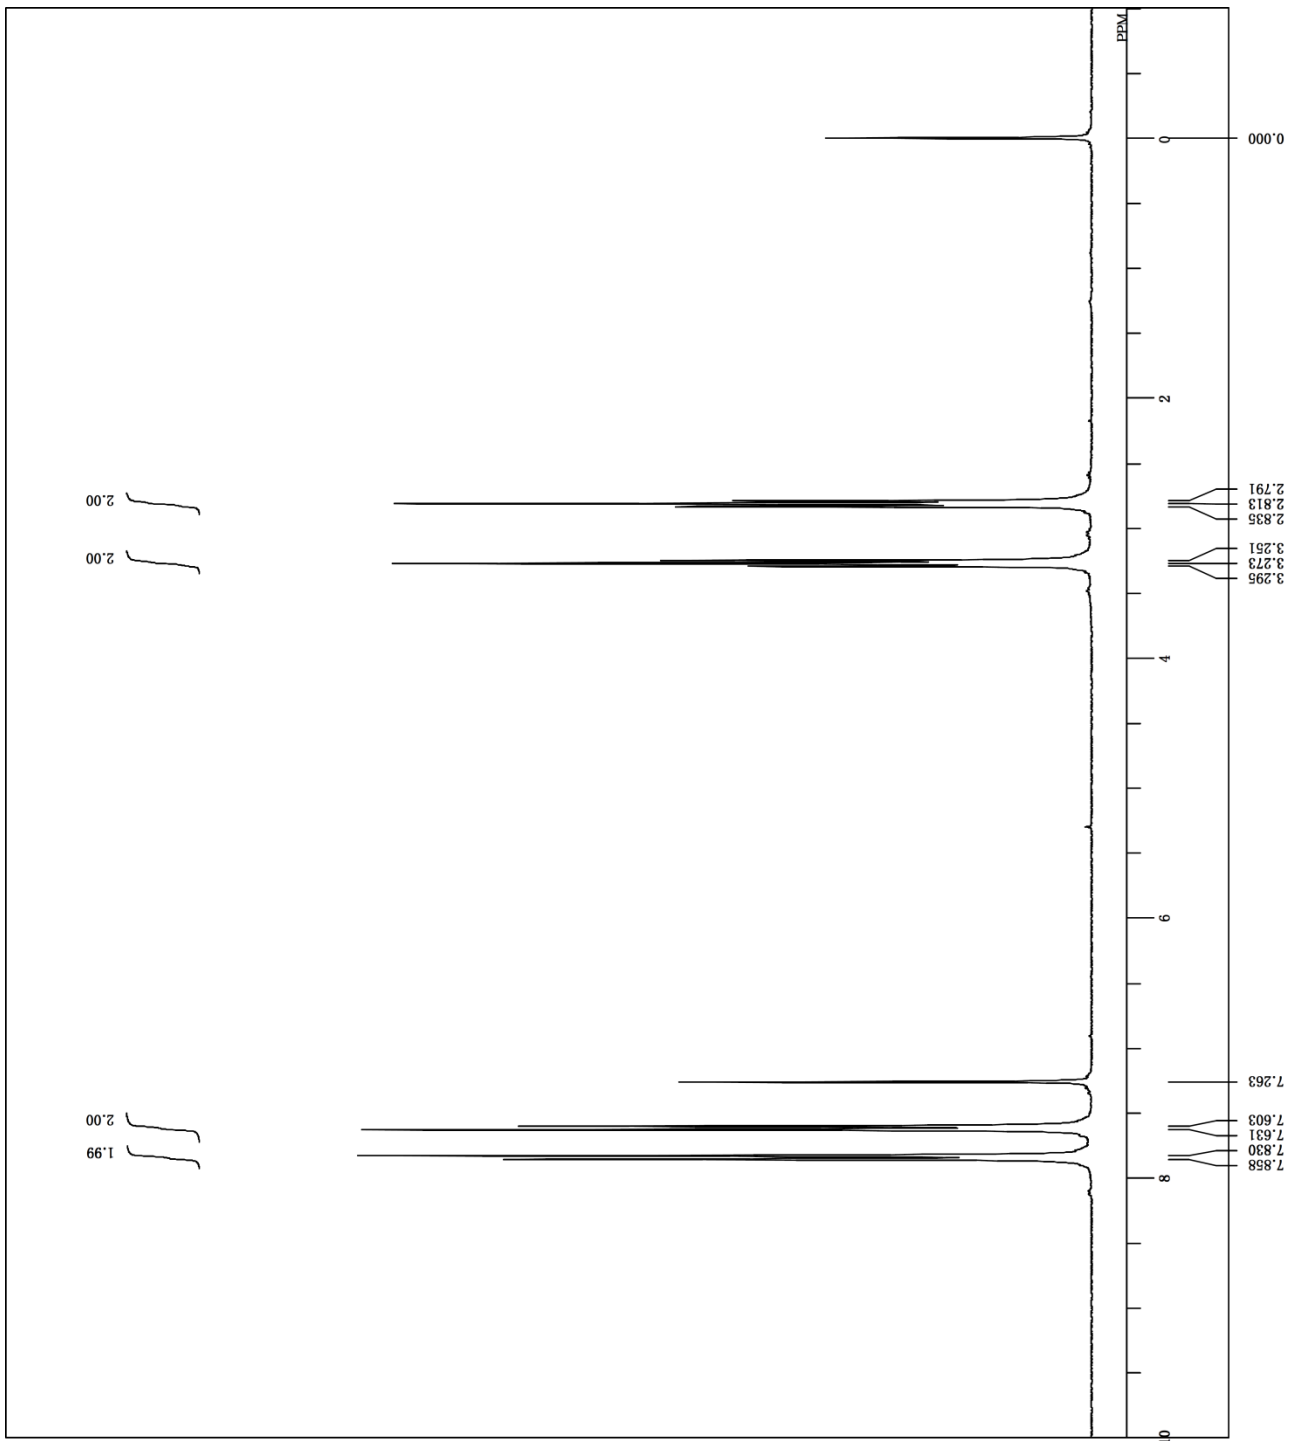

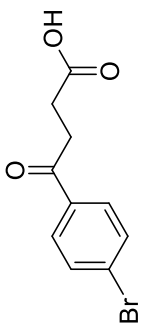

11

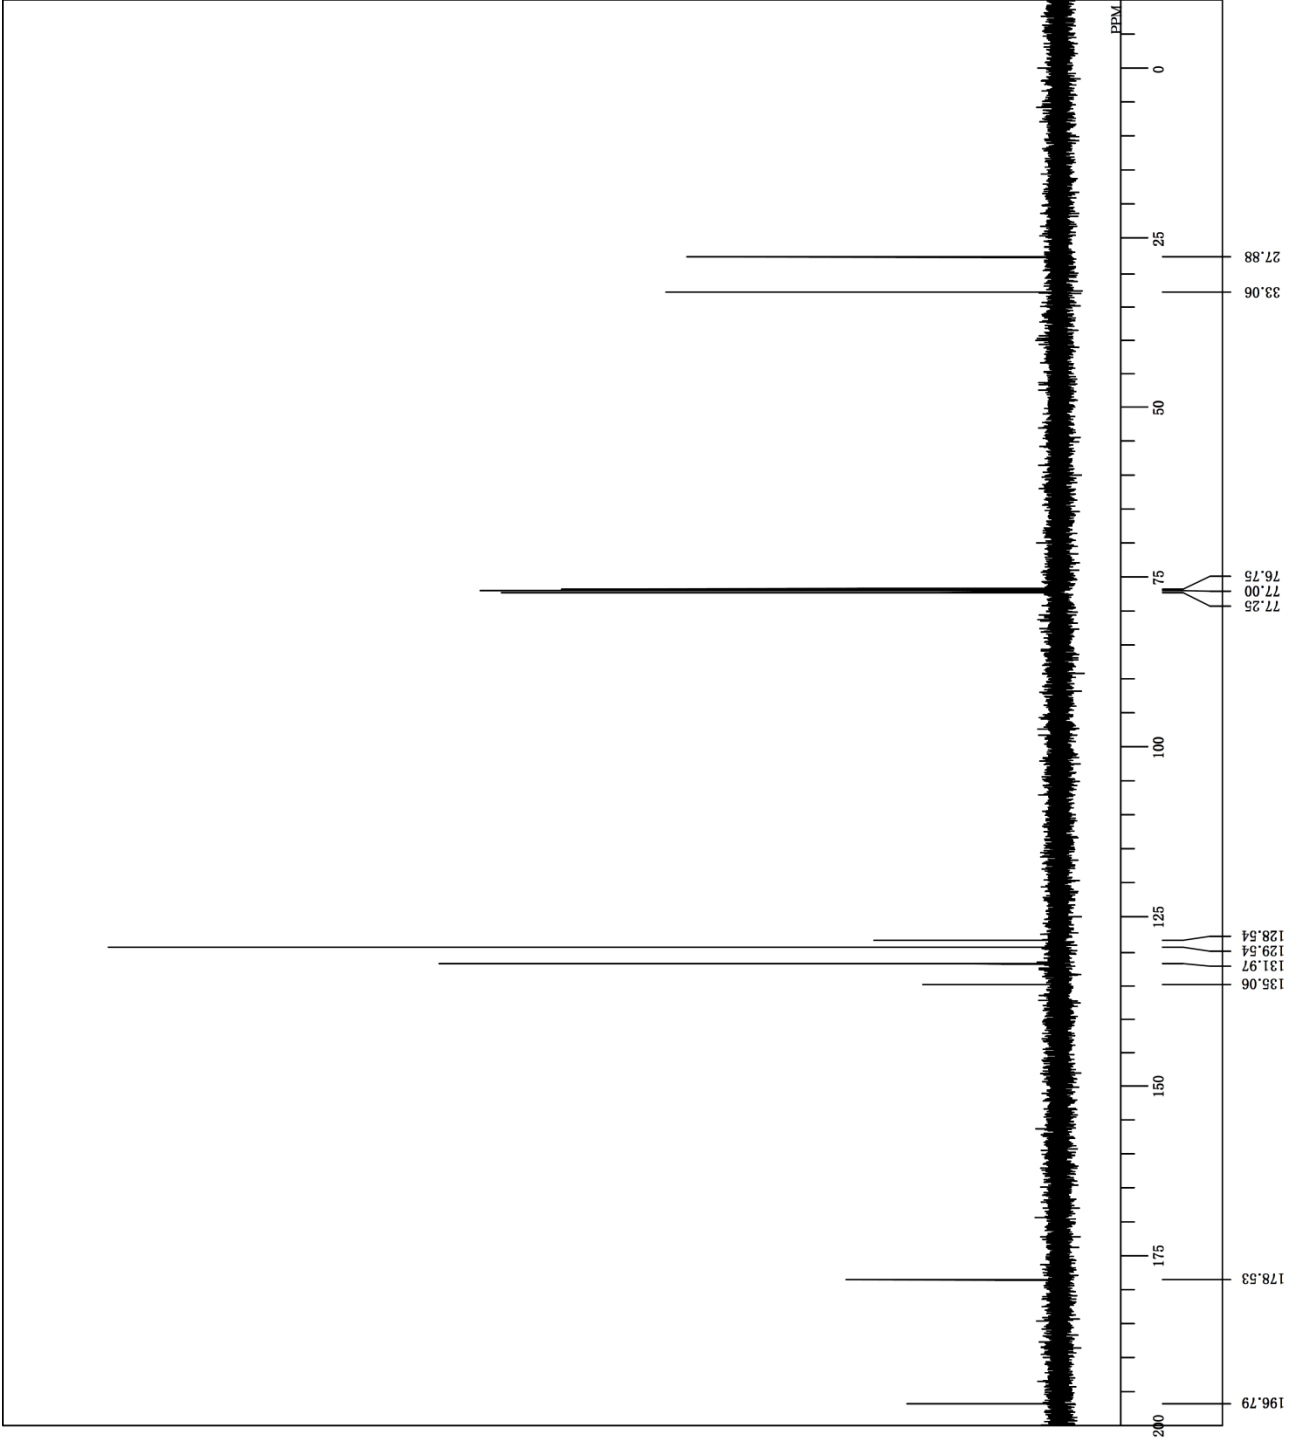

S31

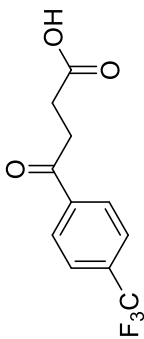

1m

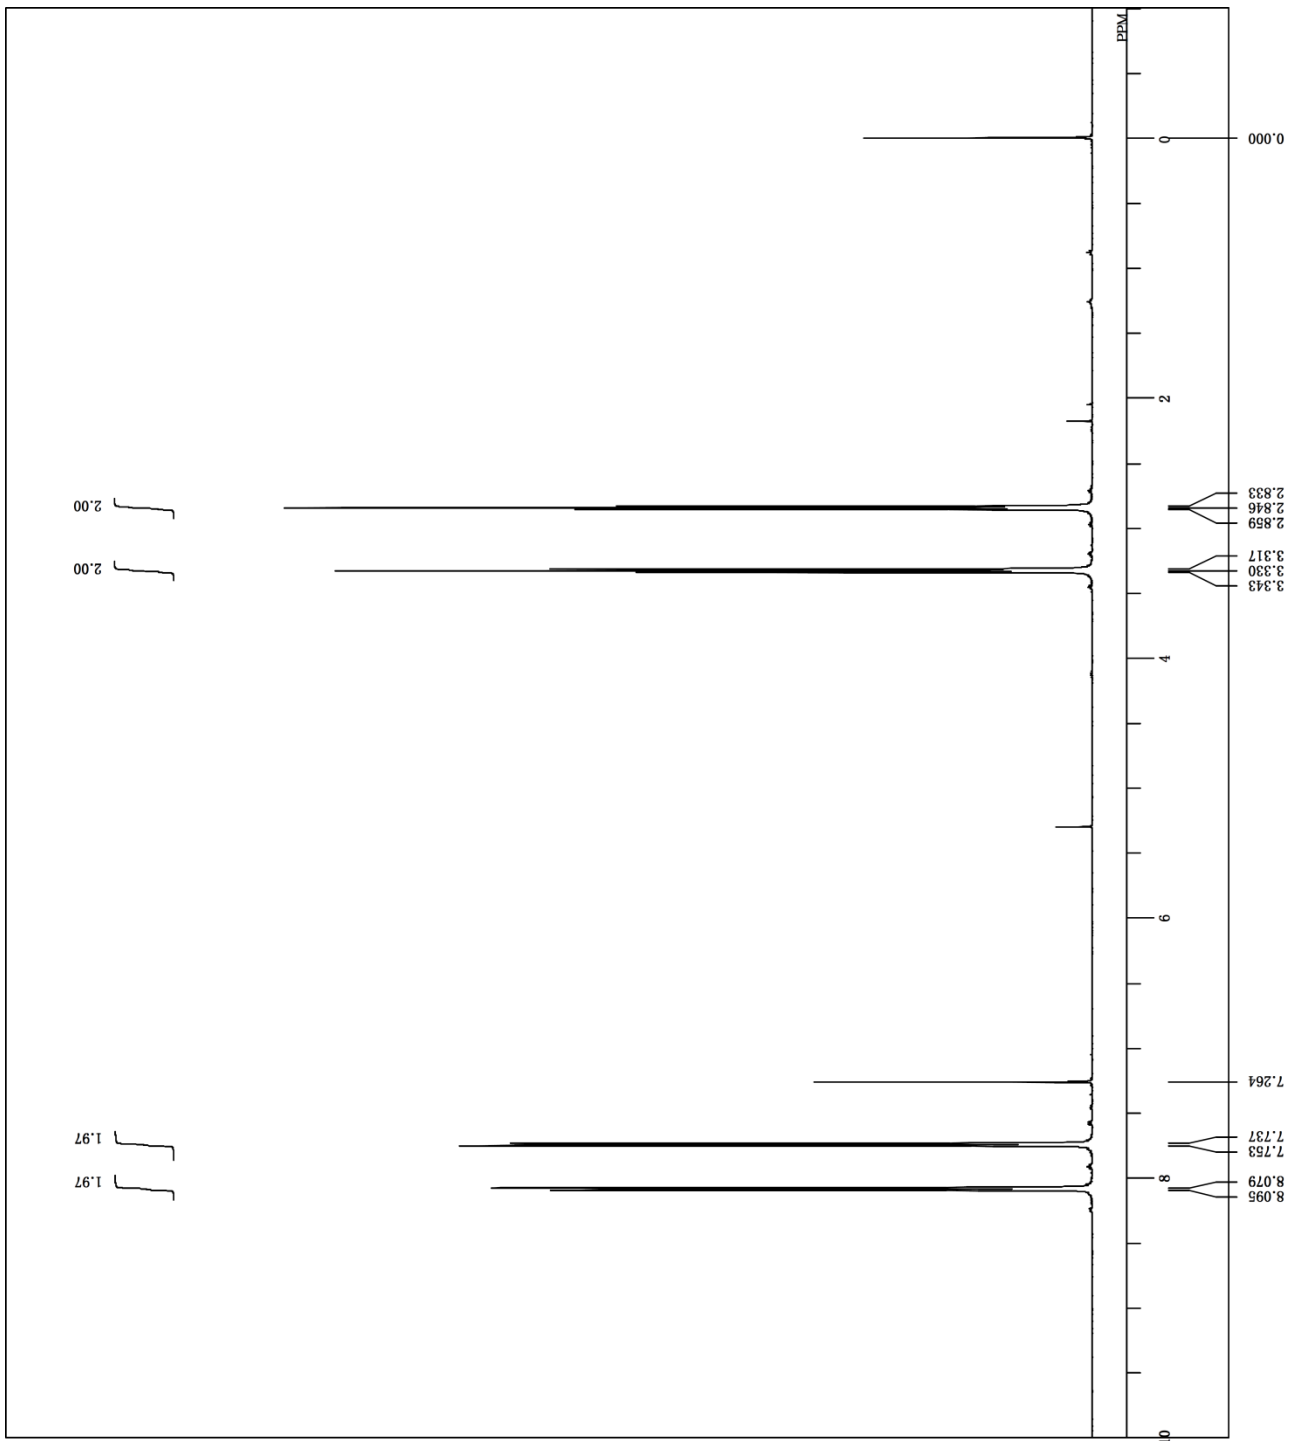





1m

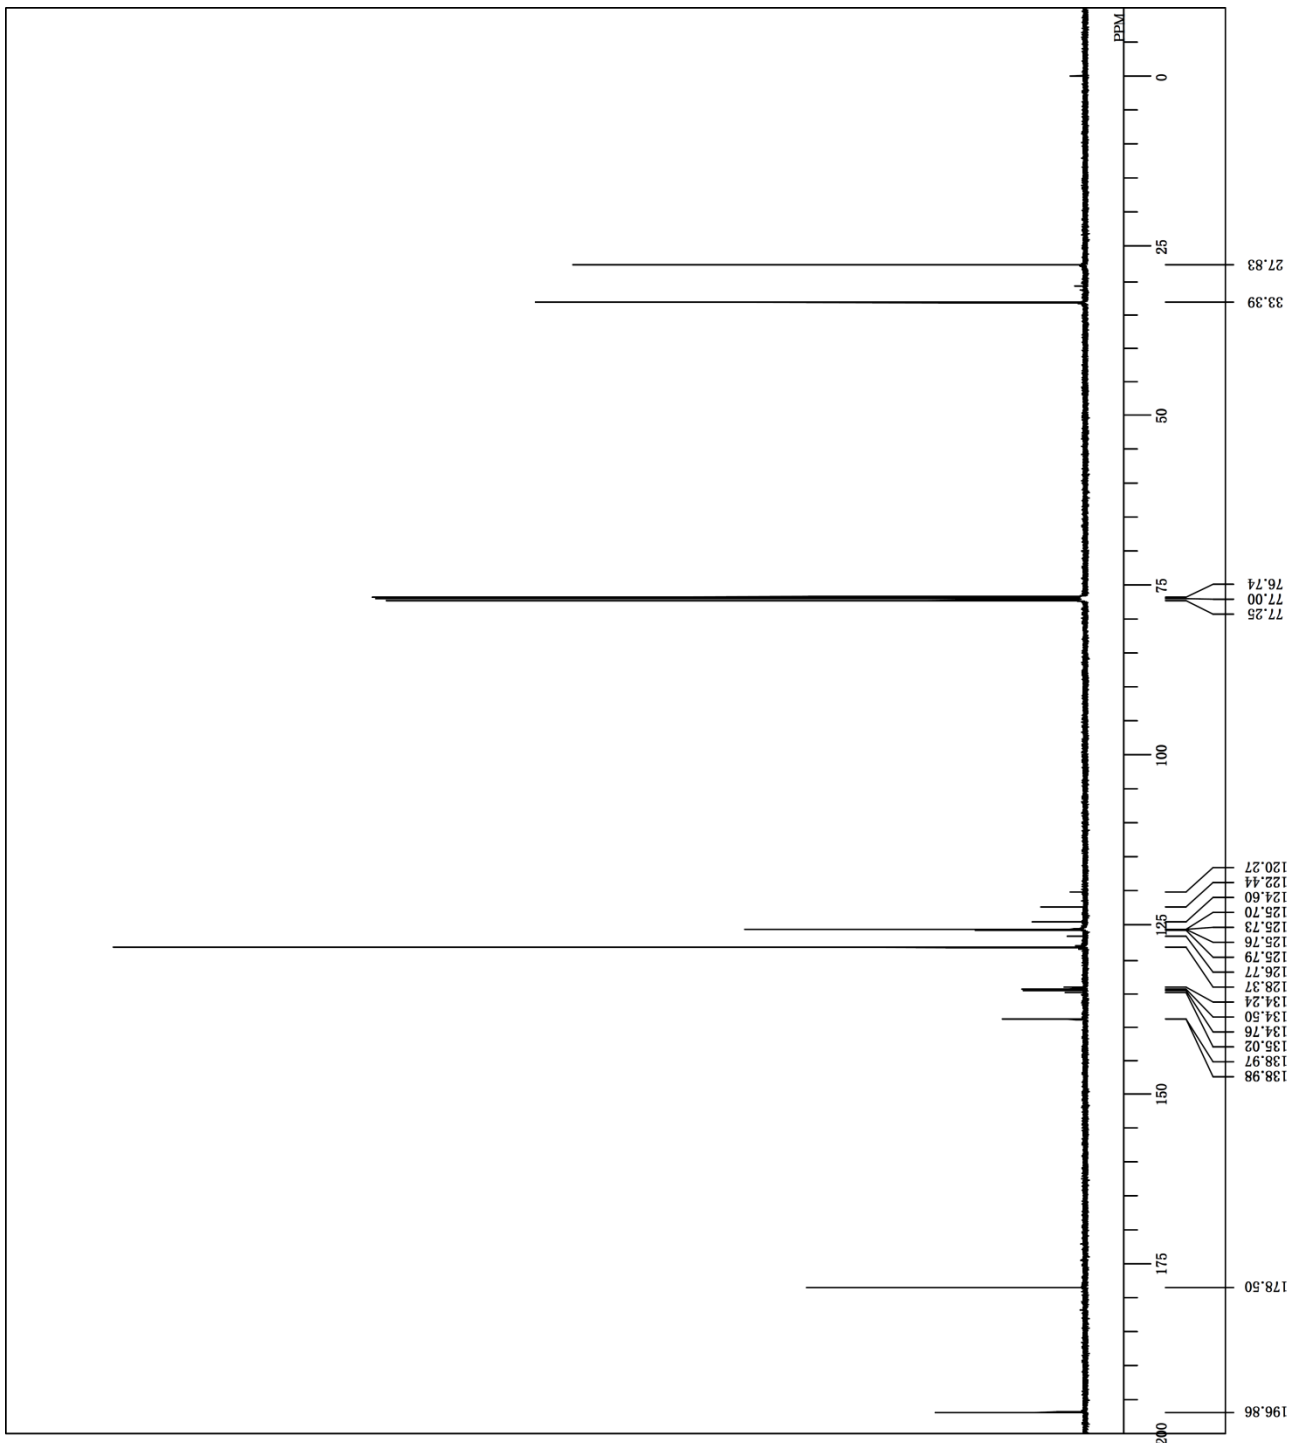

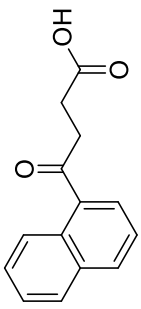

10

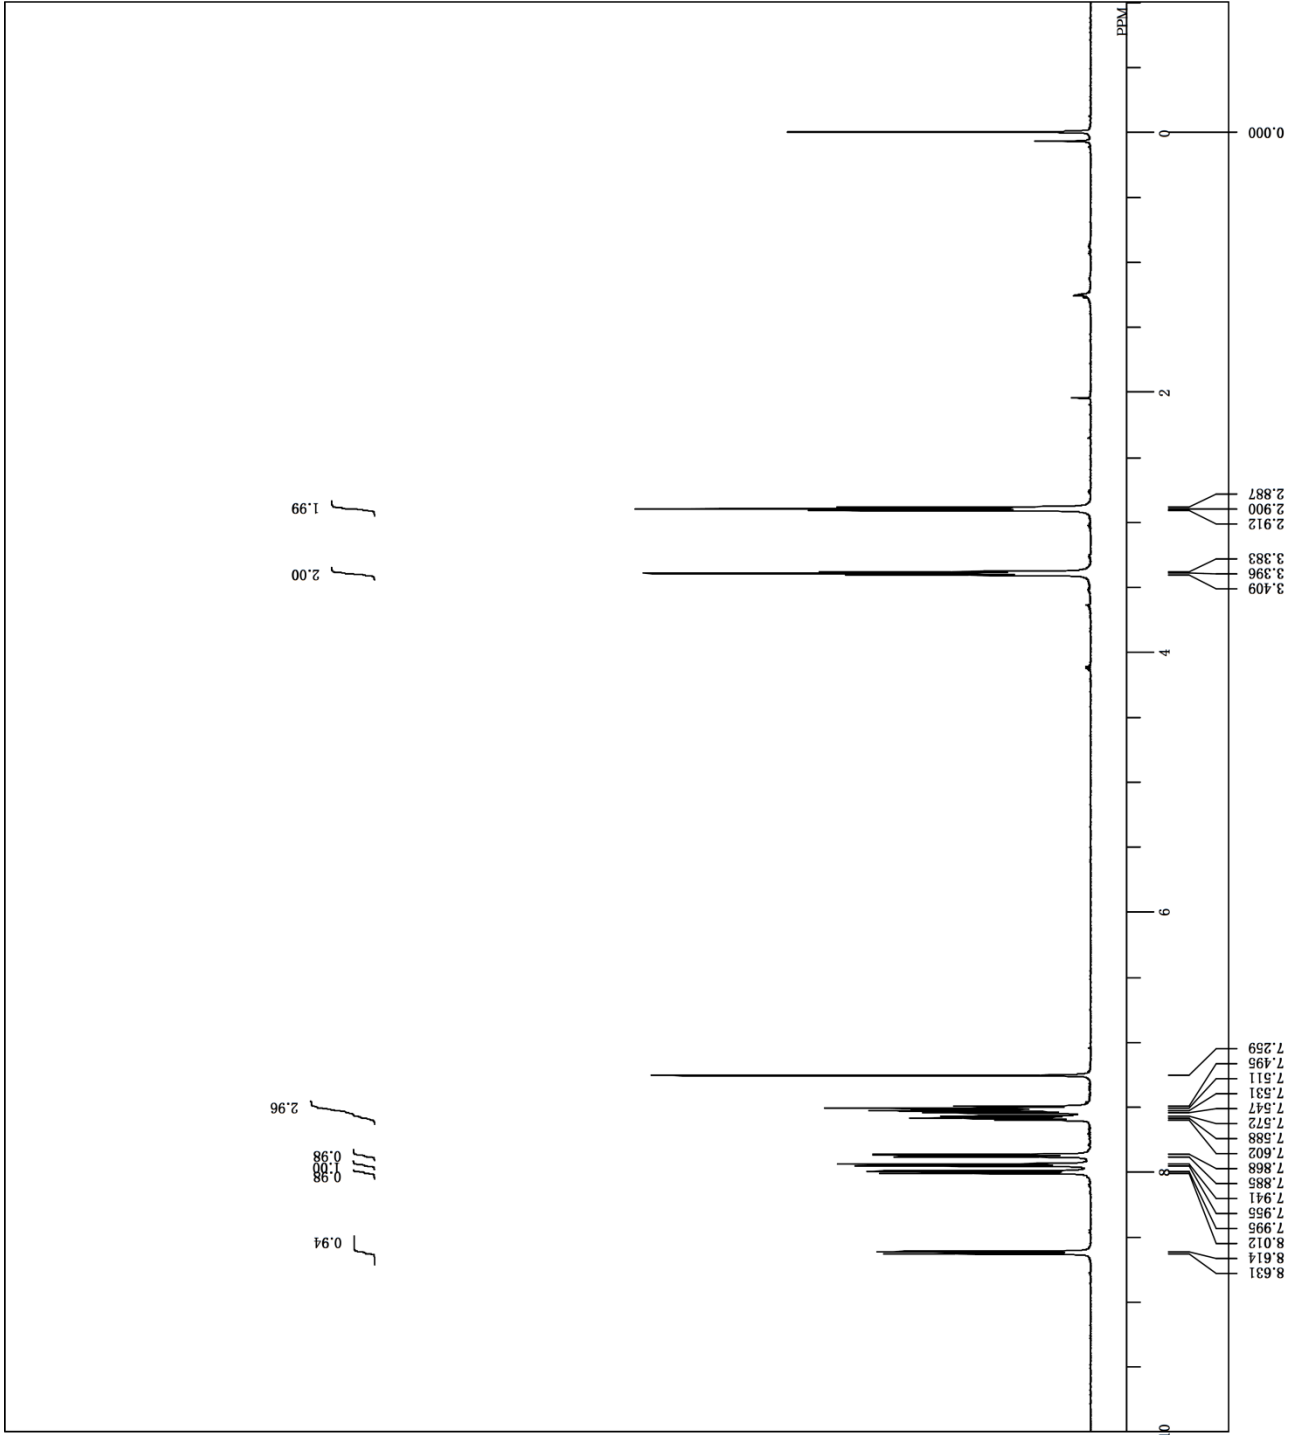

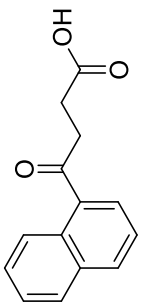

10

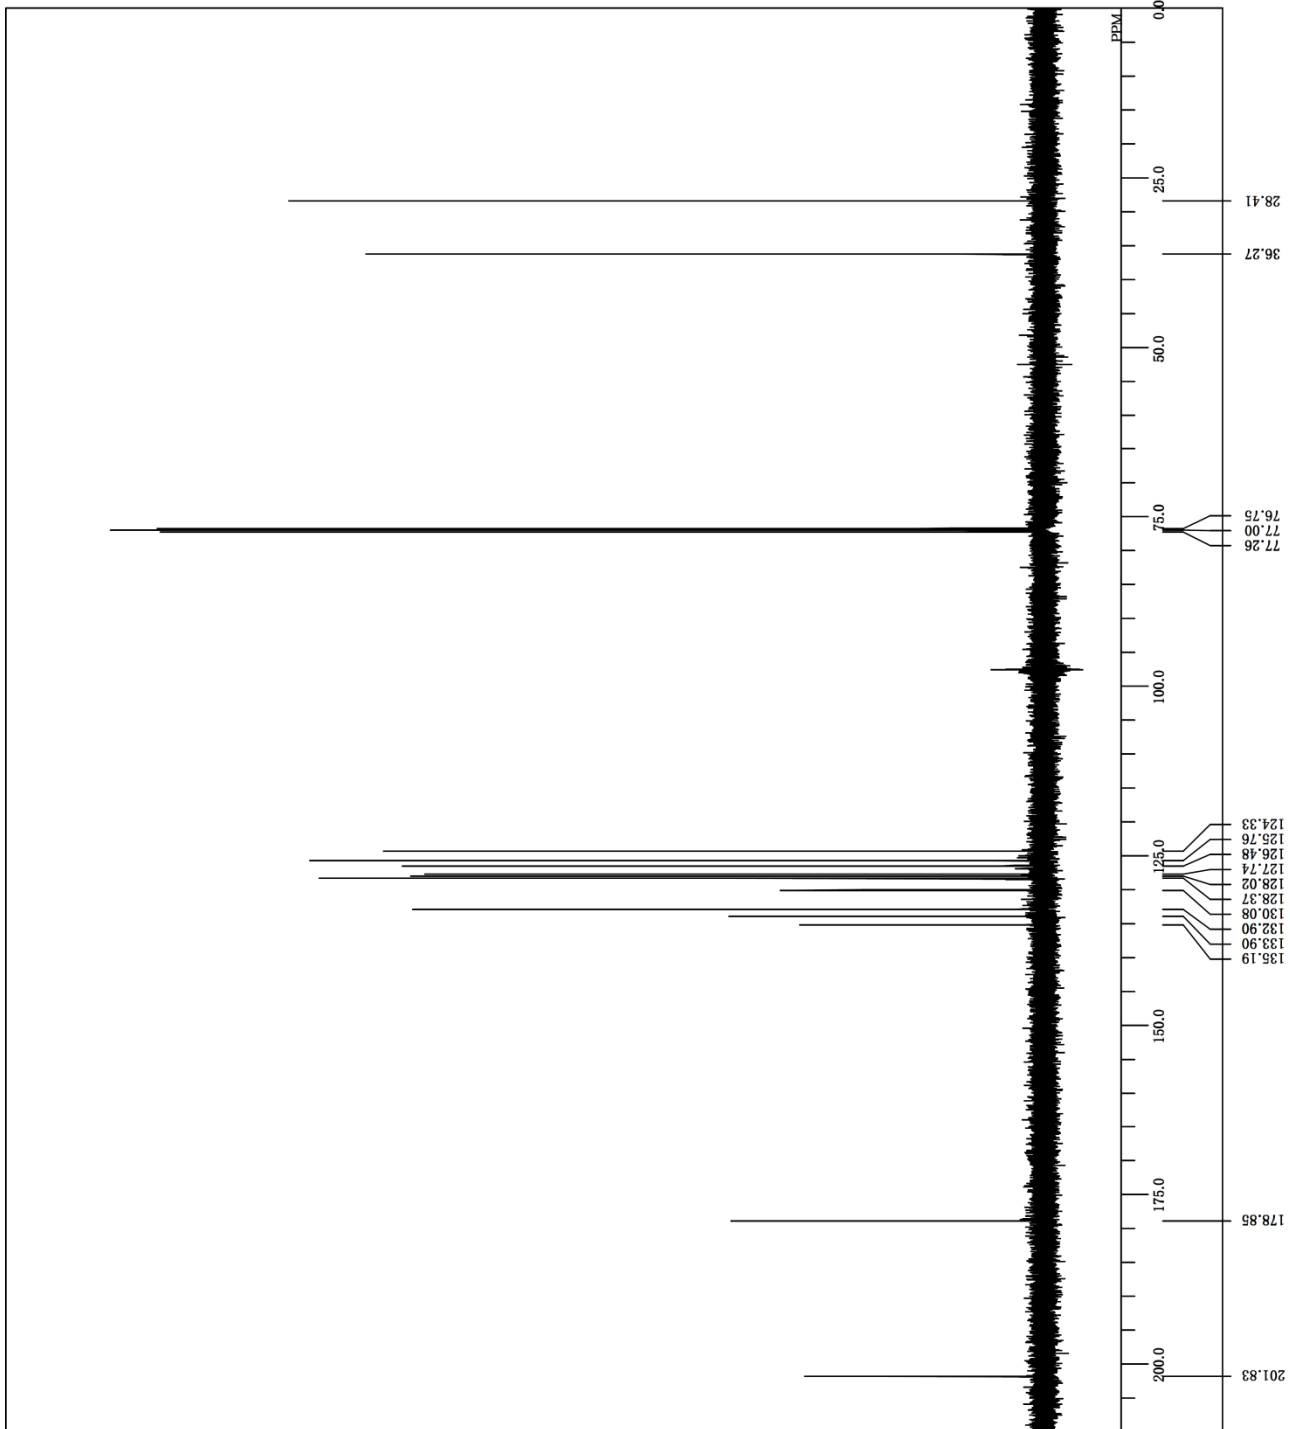

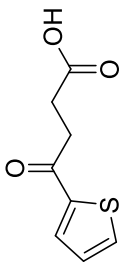

1p

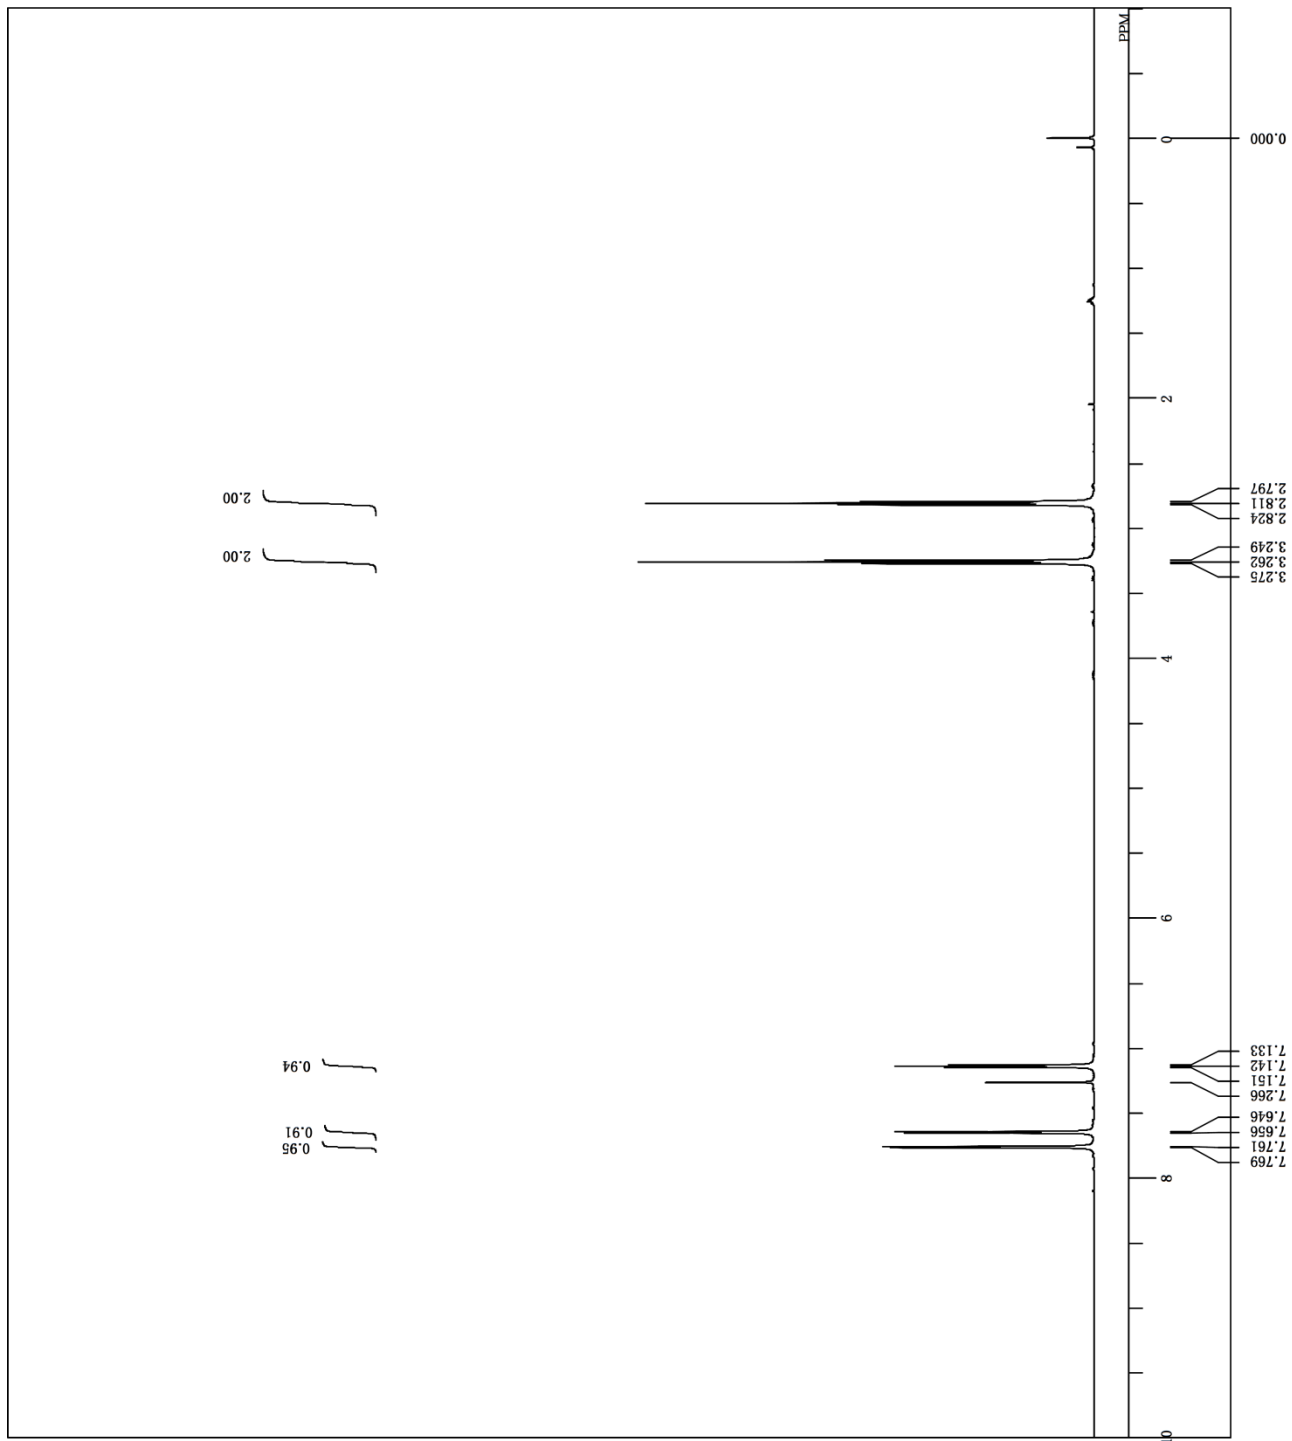



1p

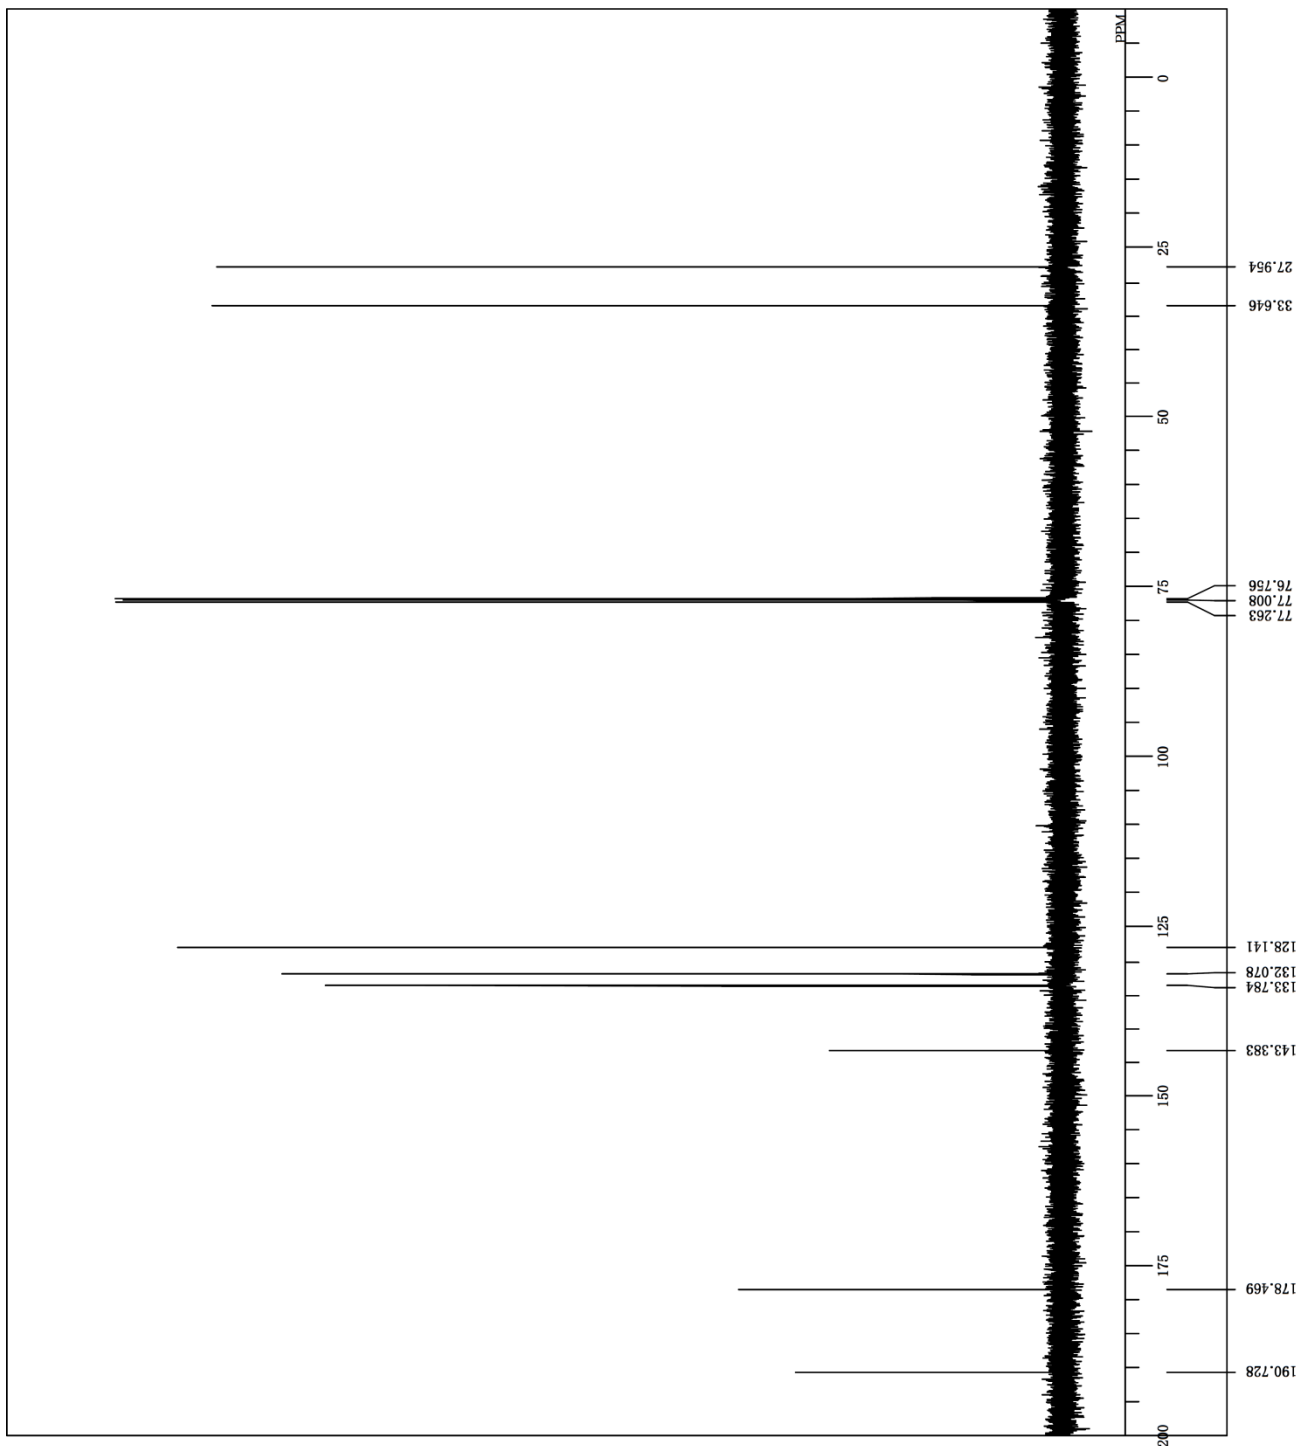

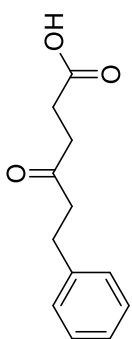

3

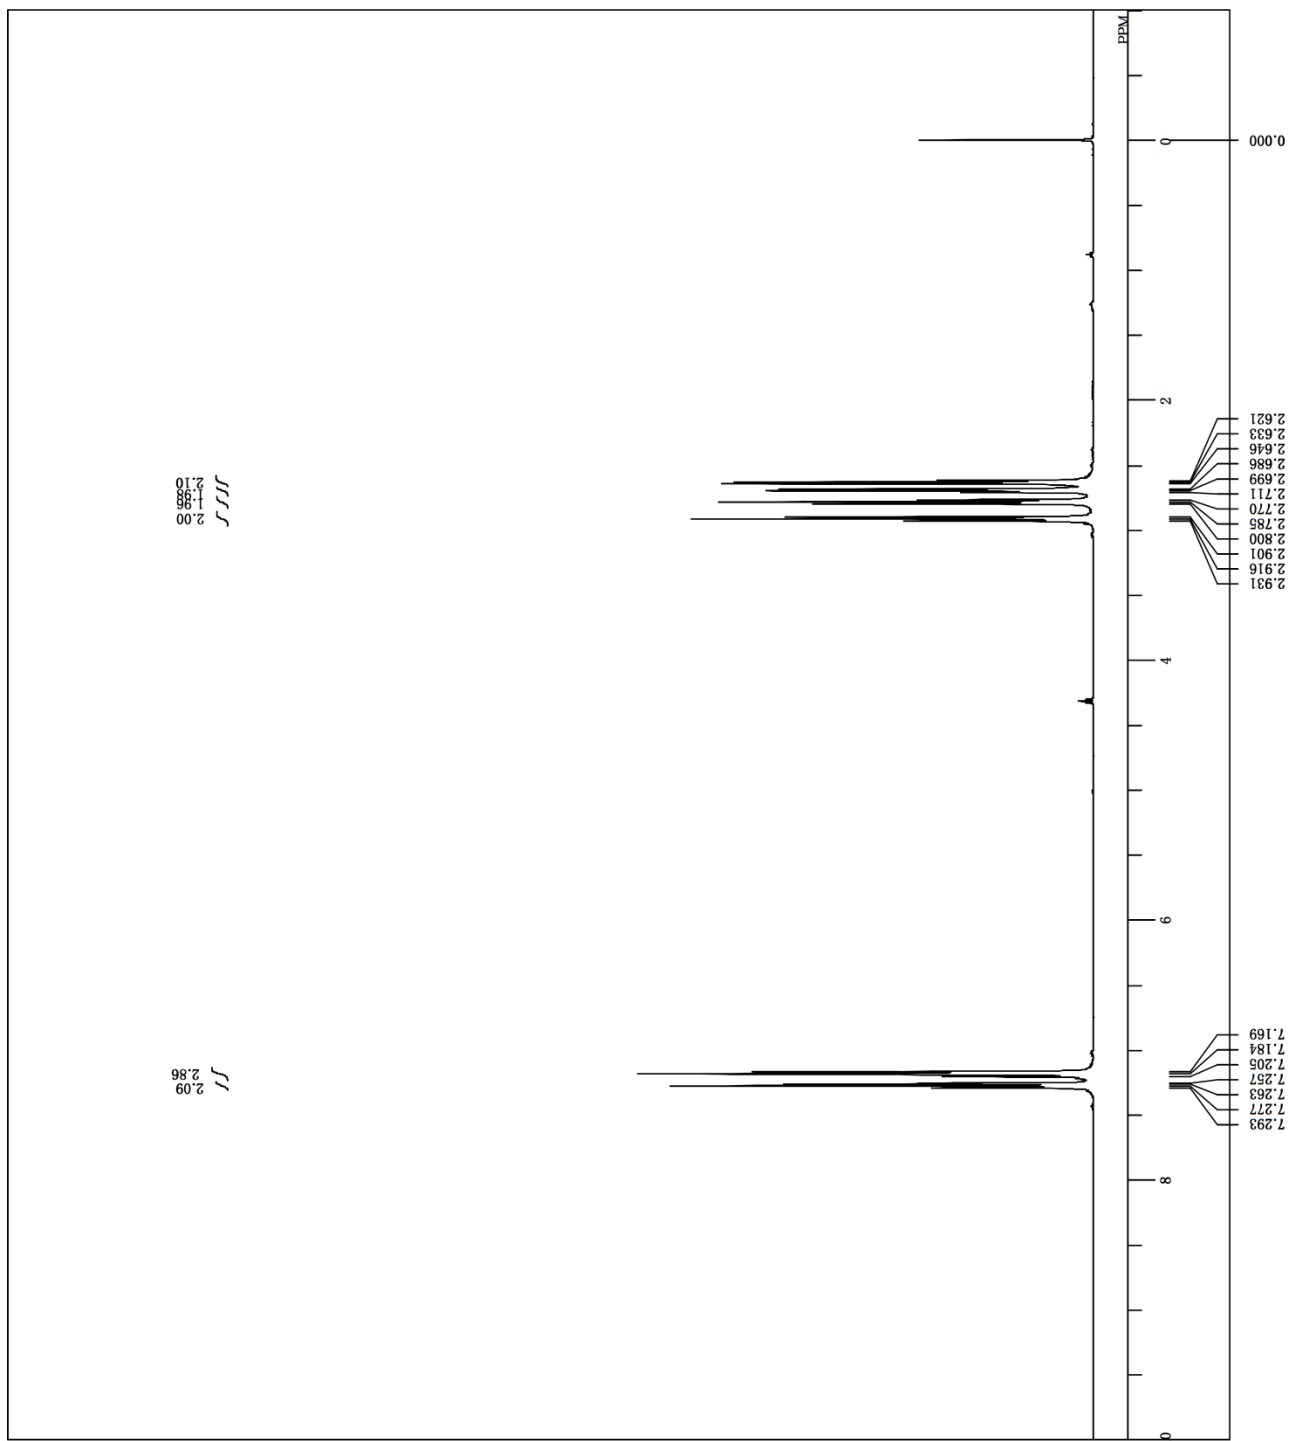

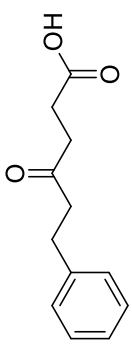

3

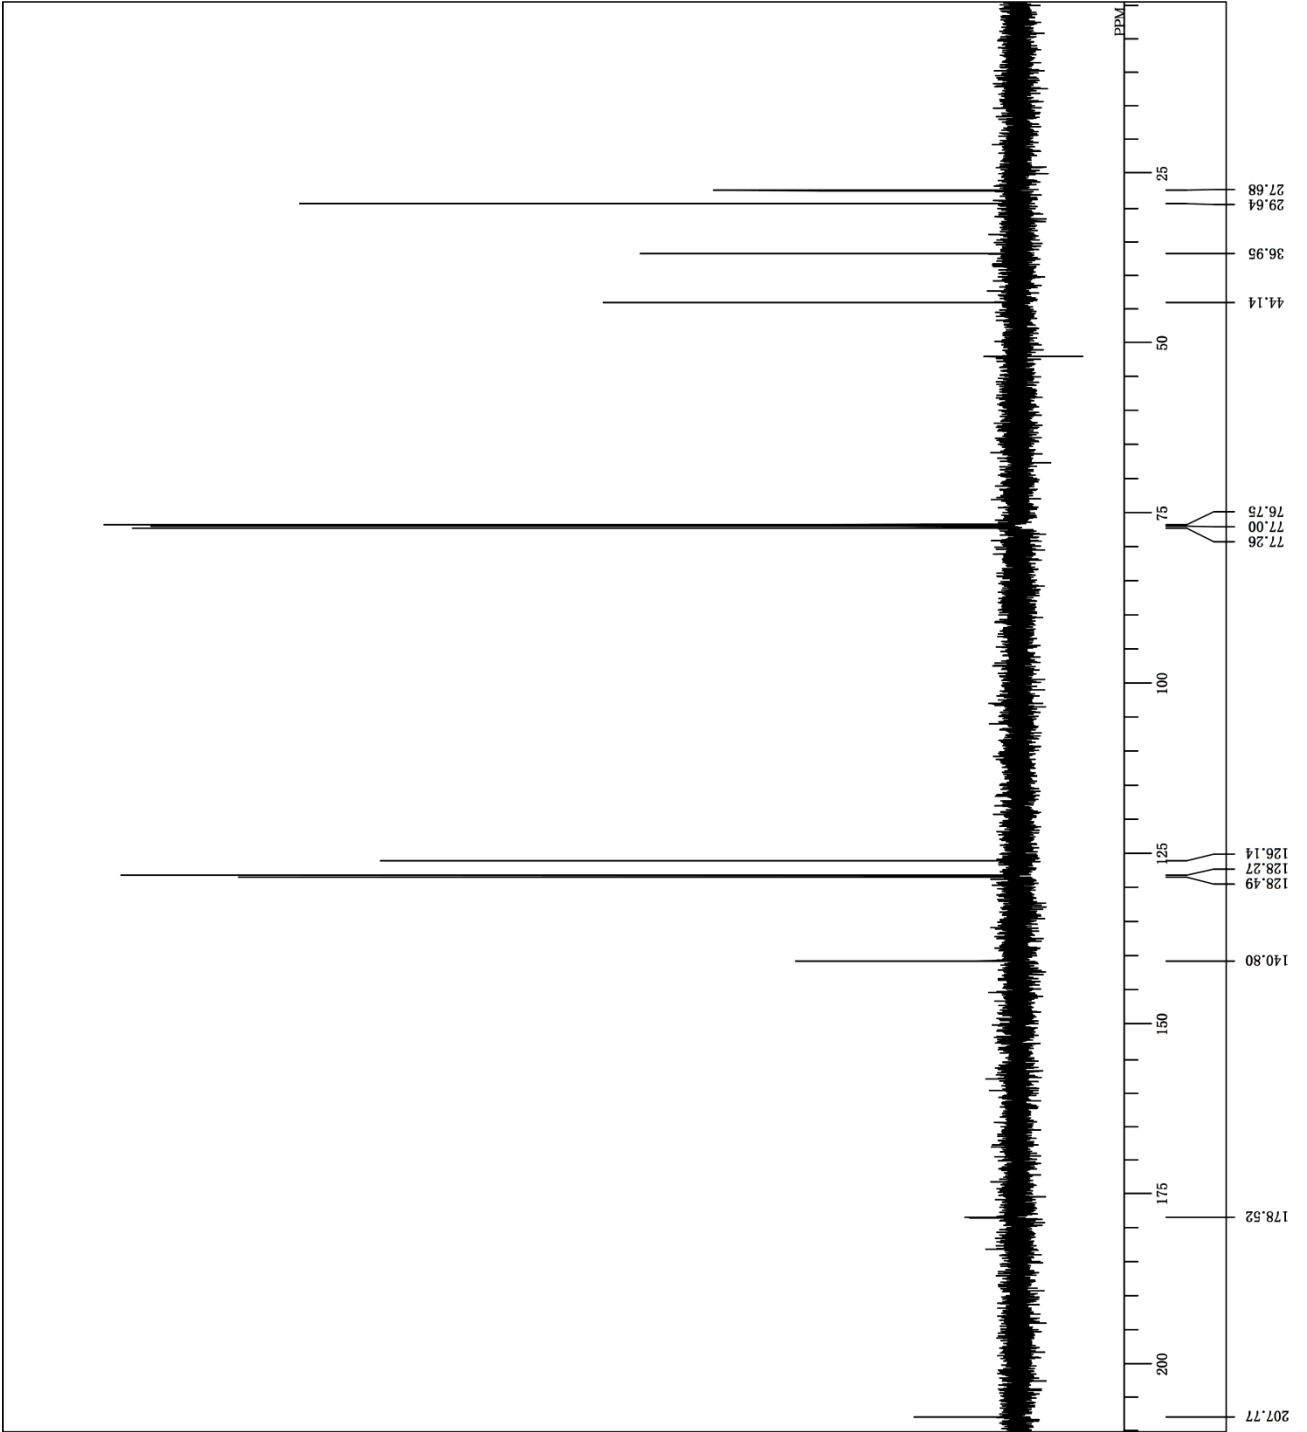

S39

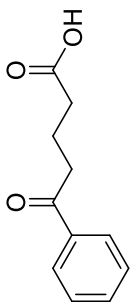

7

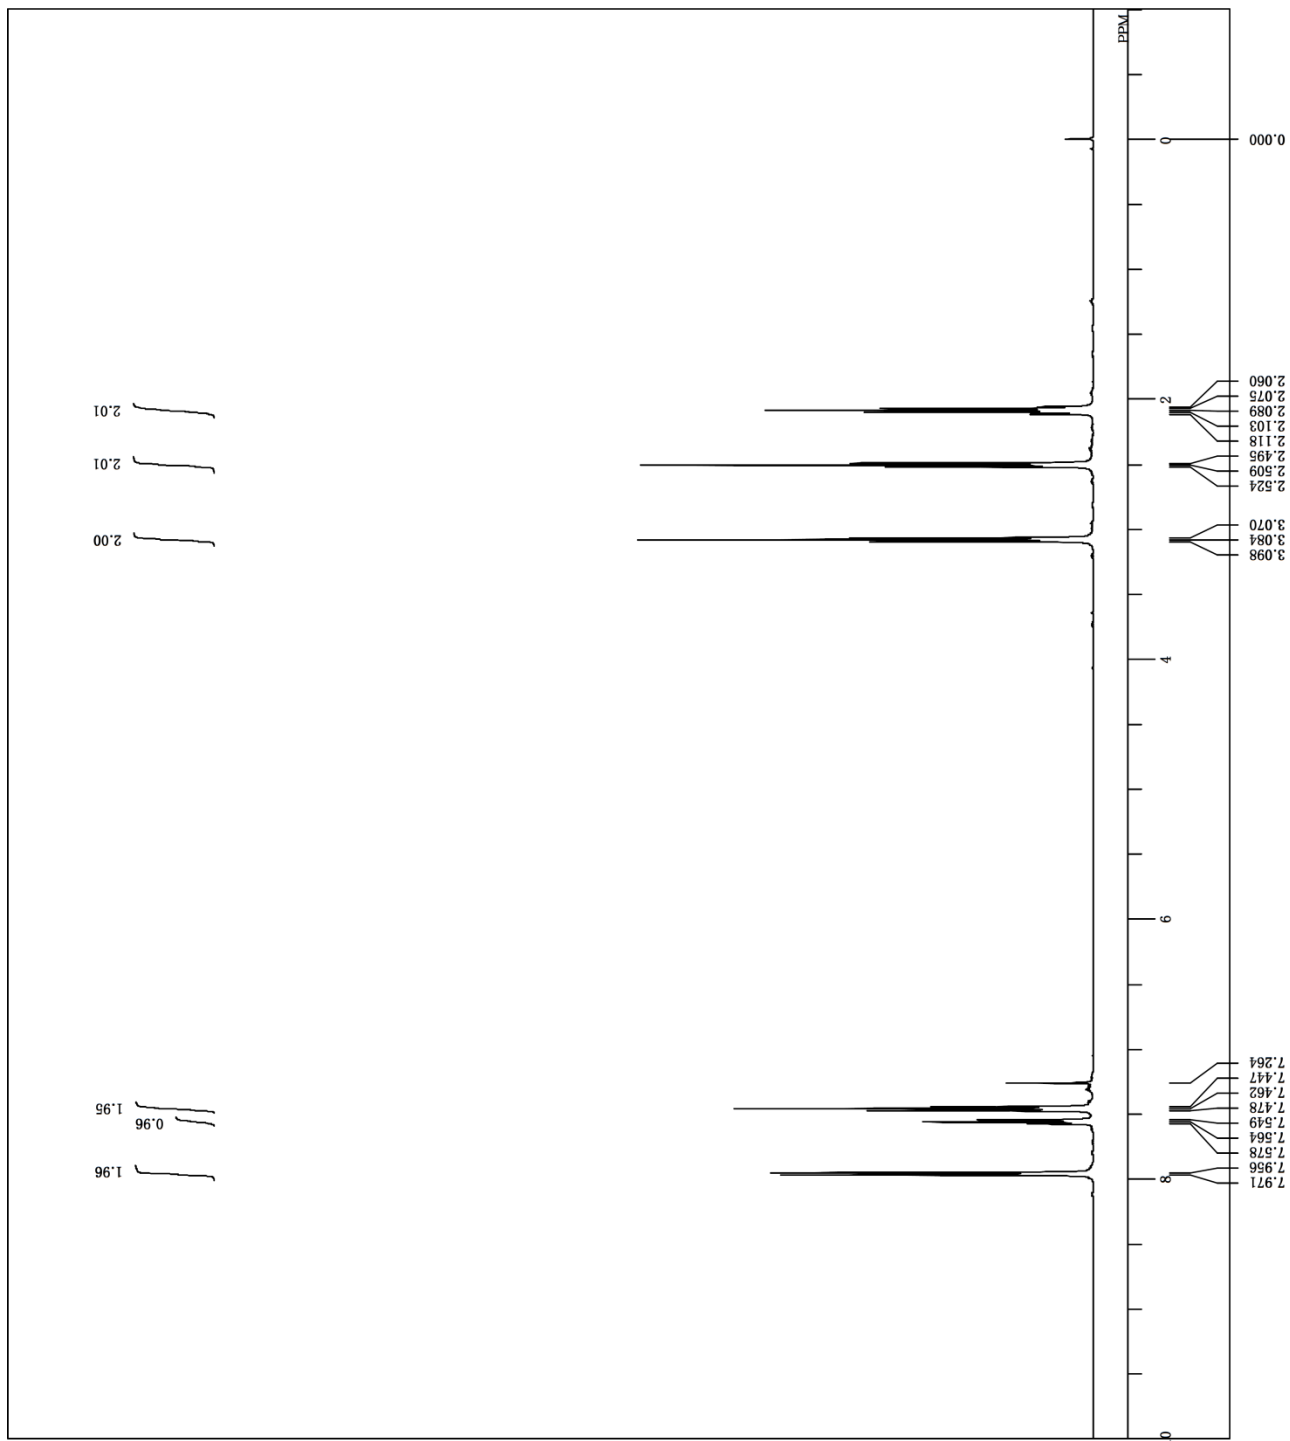





7

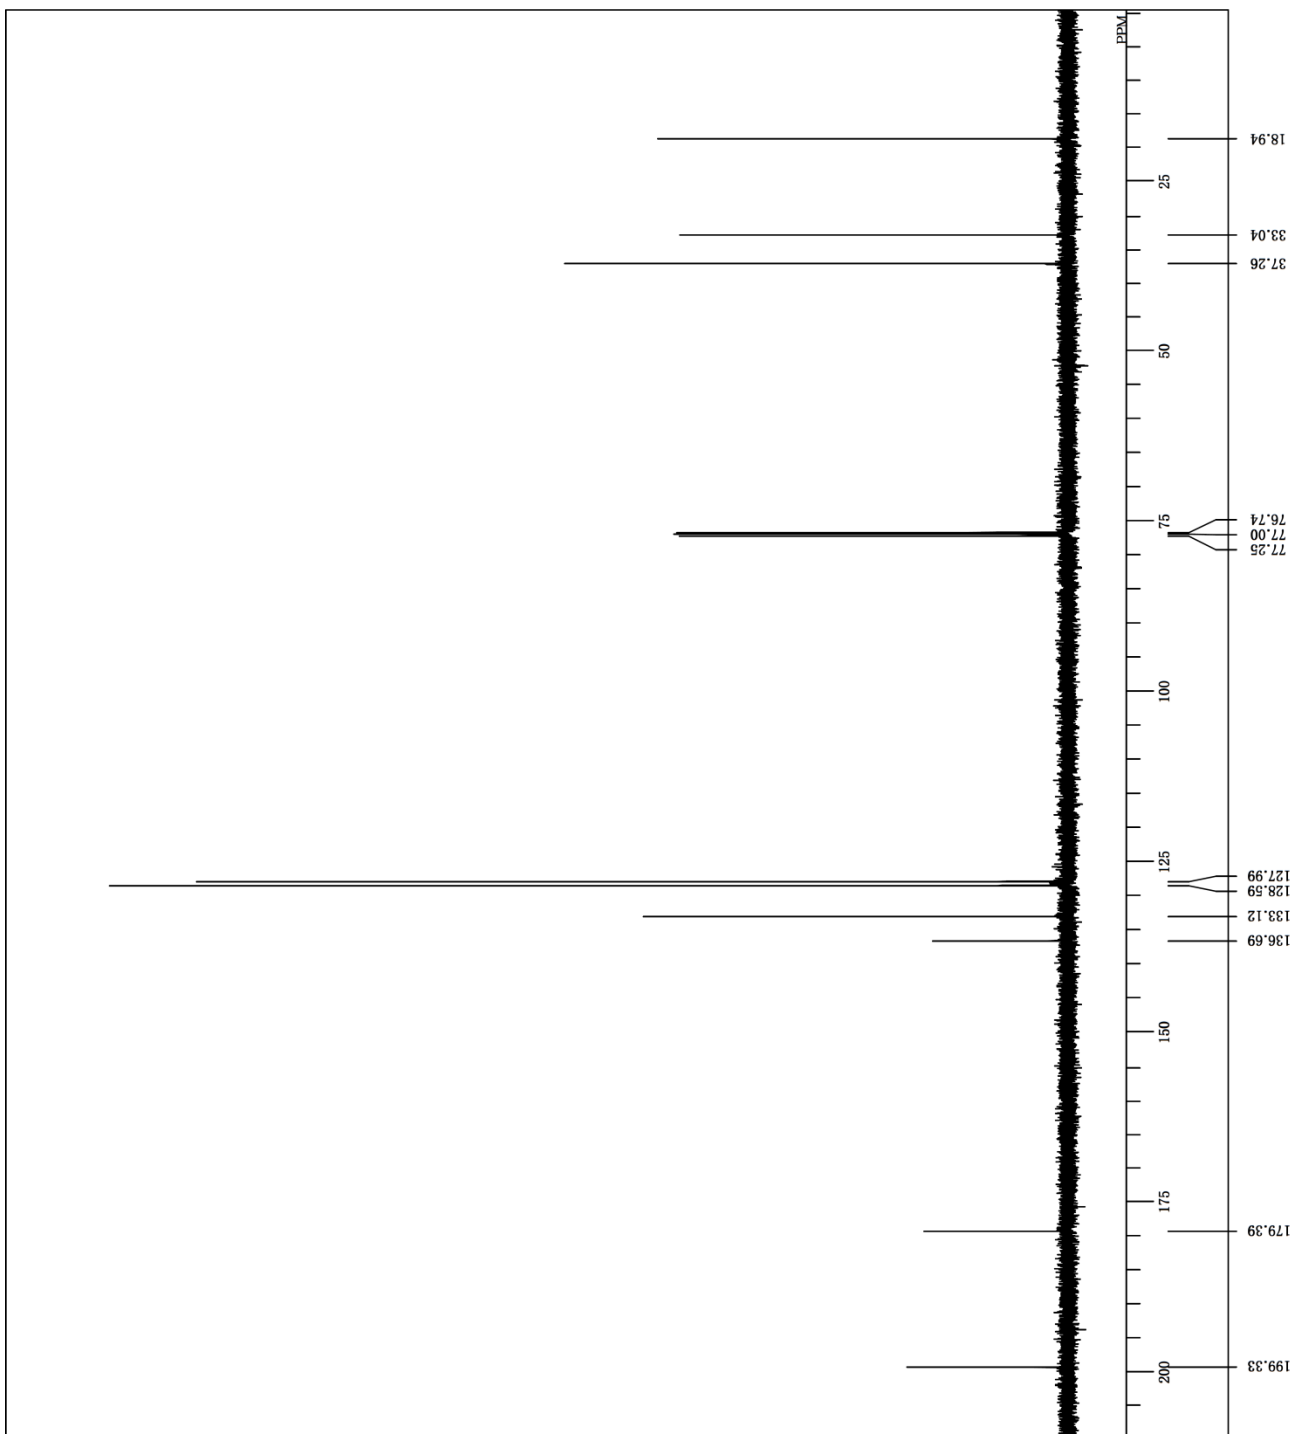

S41

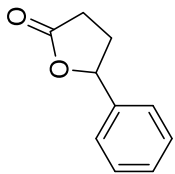

2a

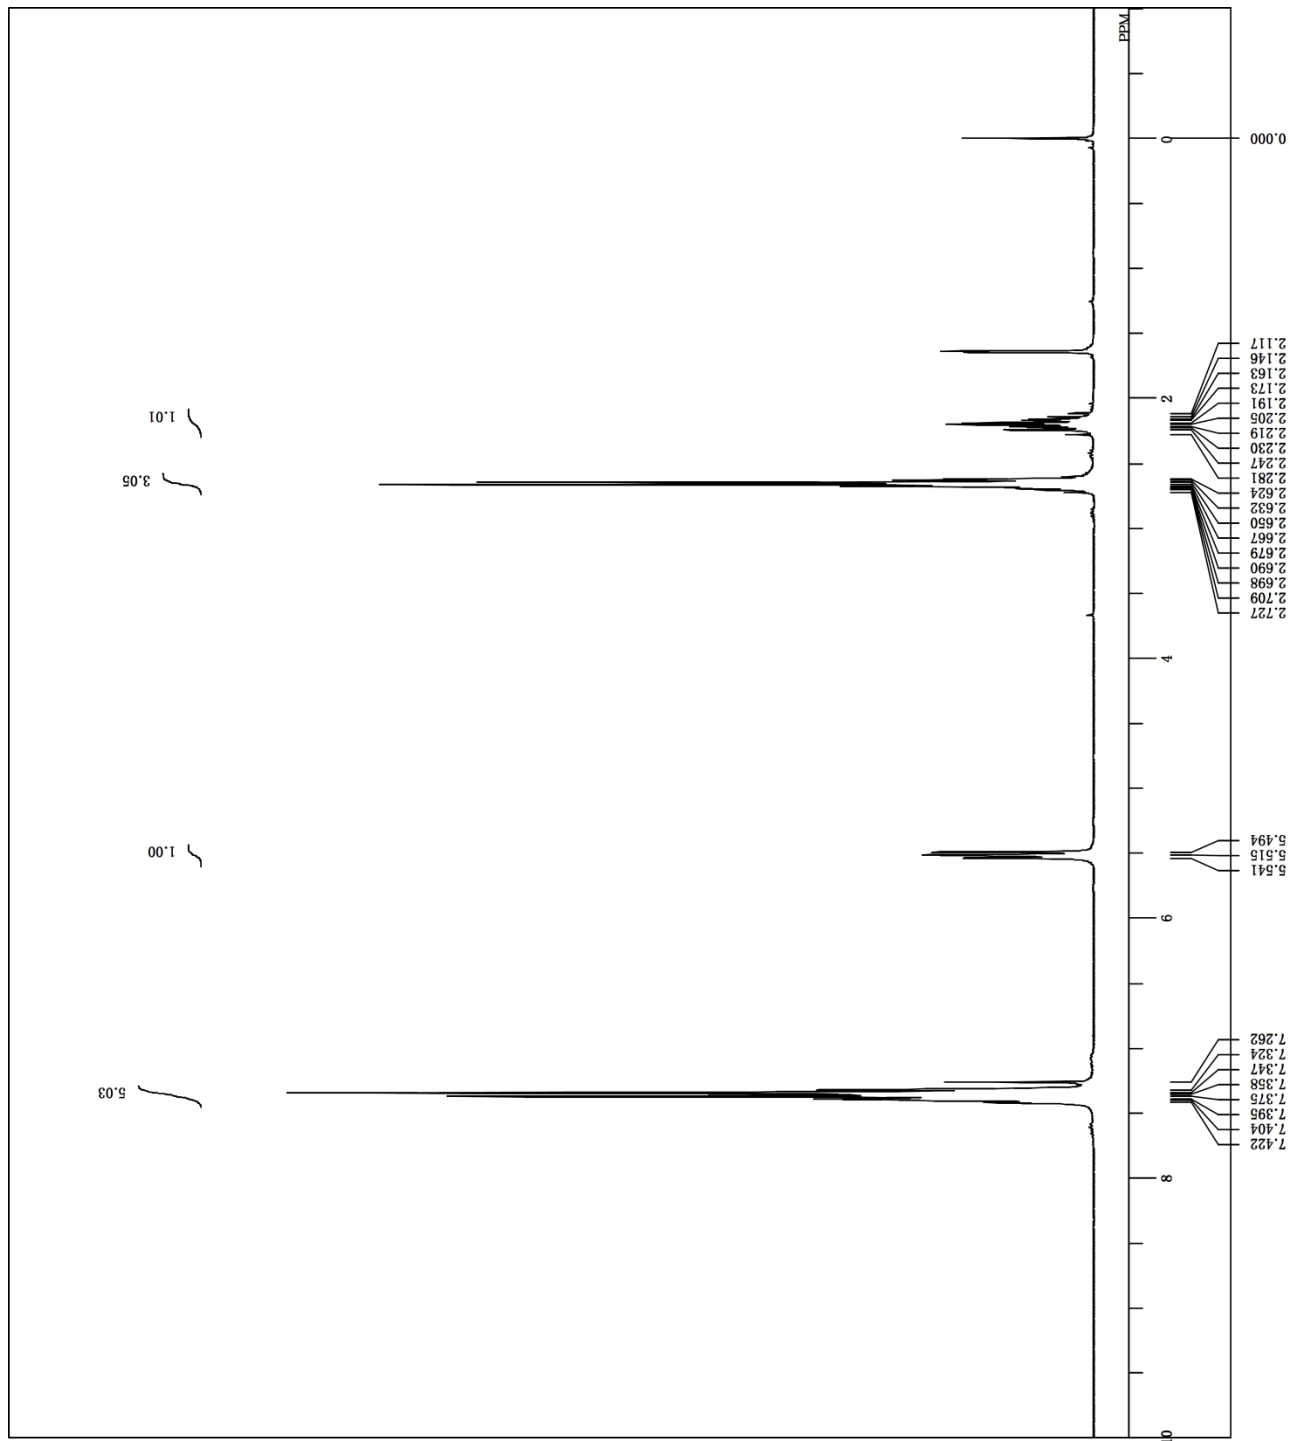

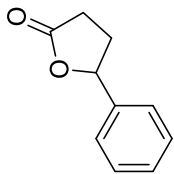

**2a**

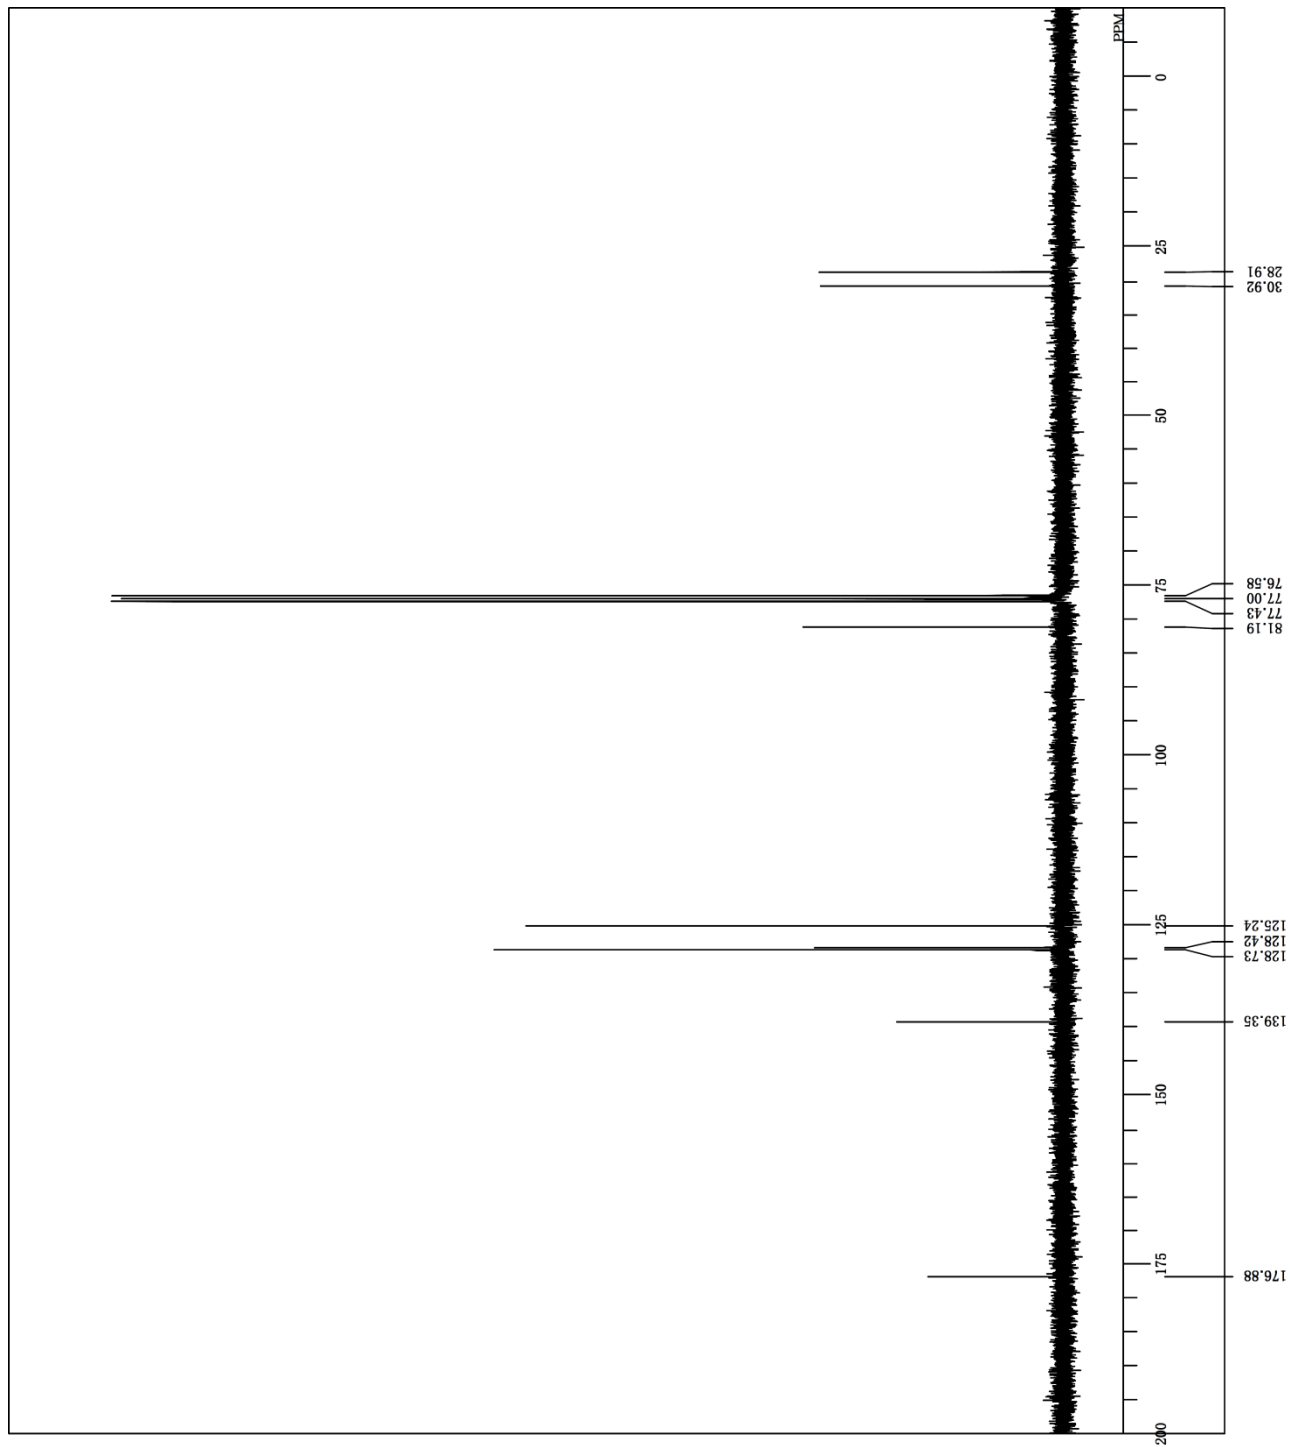

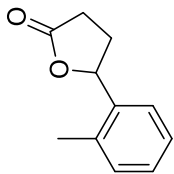

2b

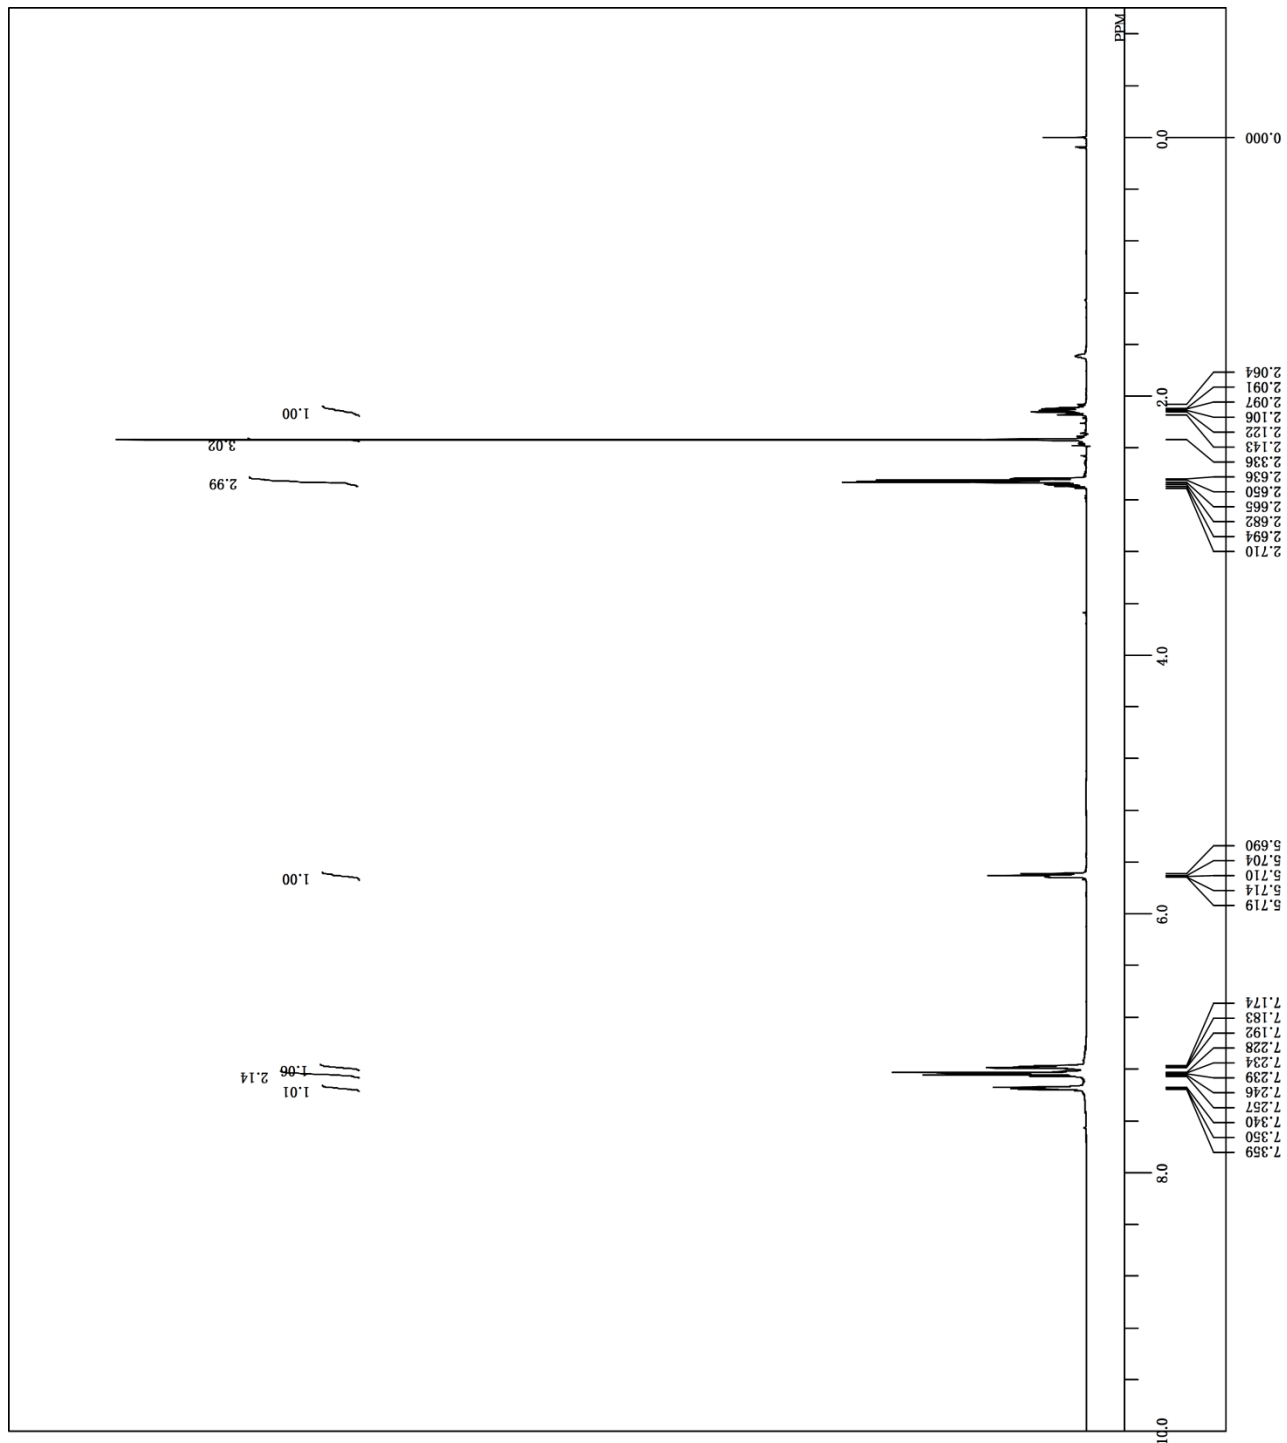

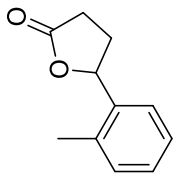

2b

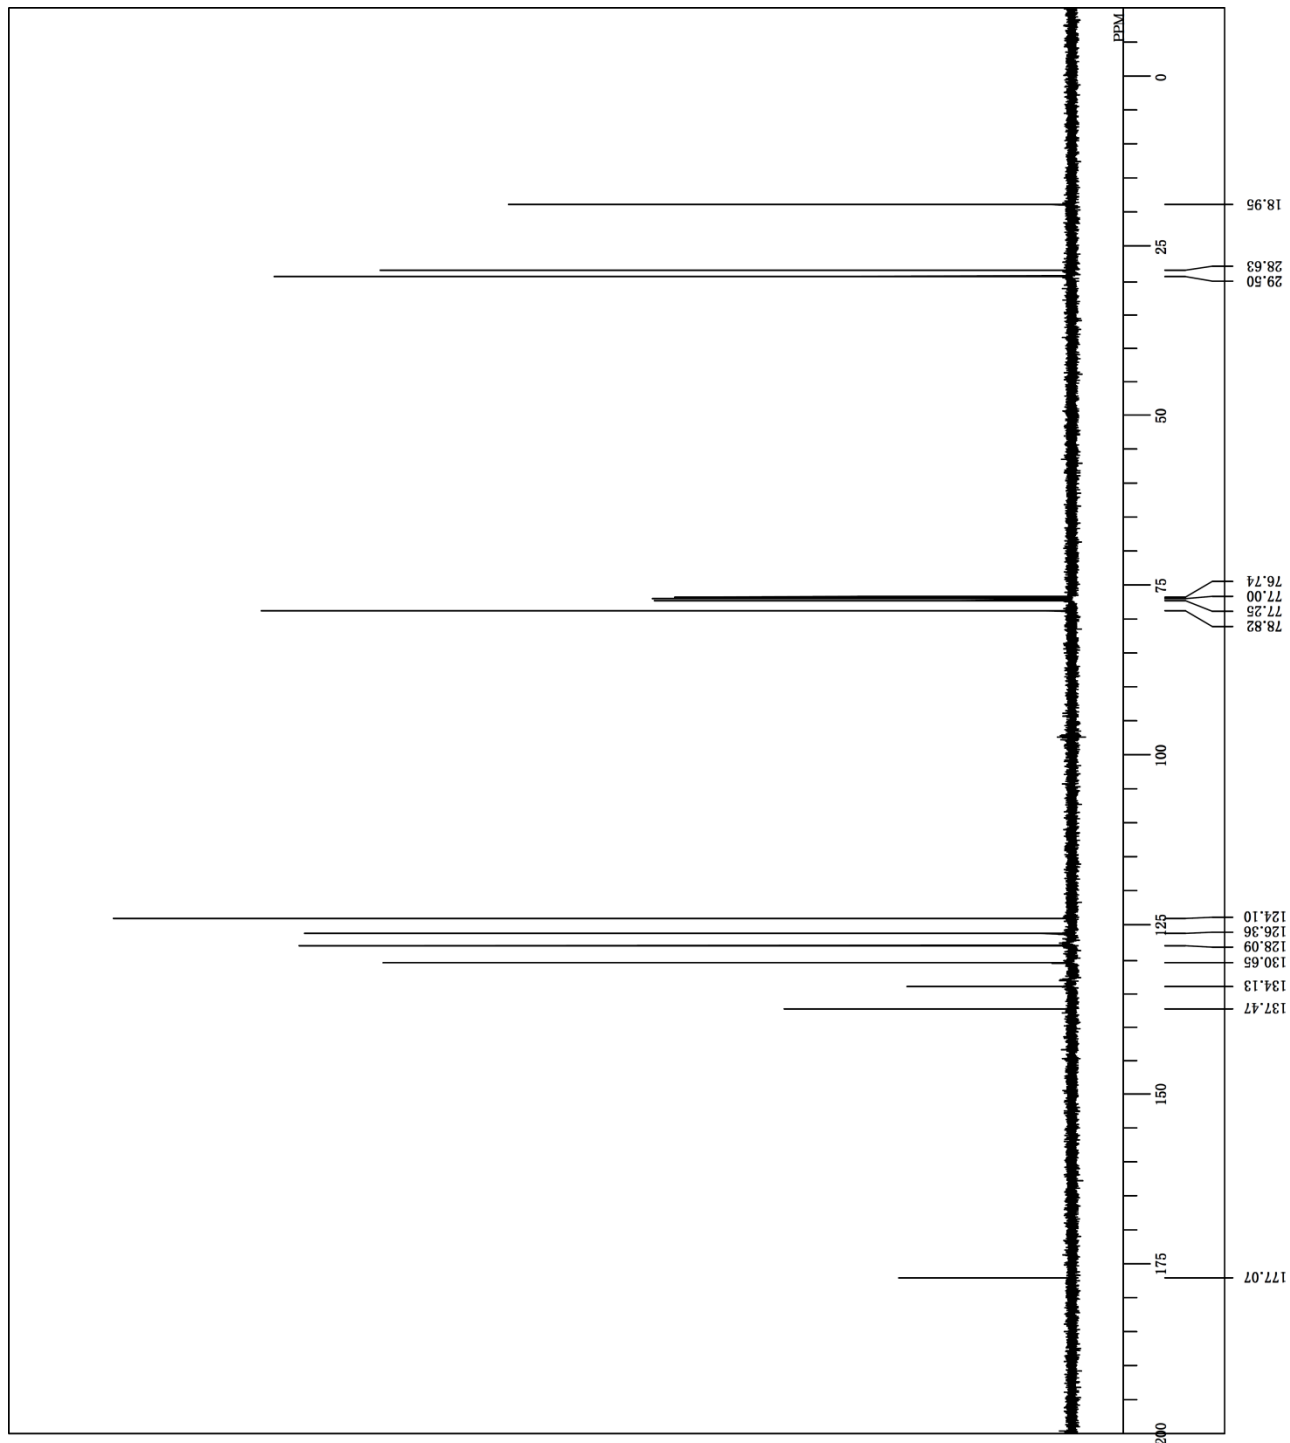

S45

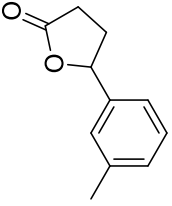

2c

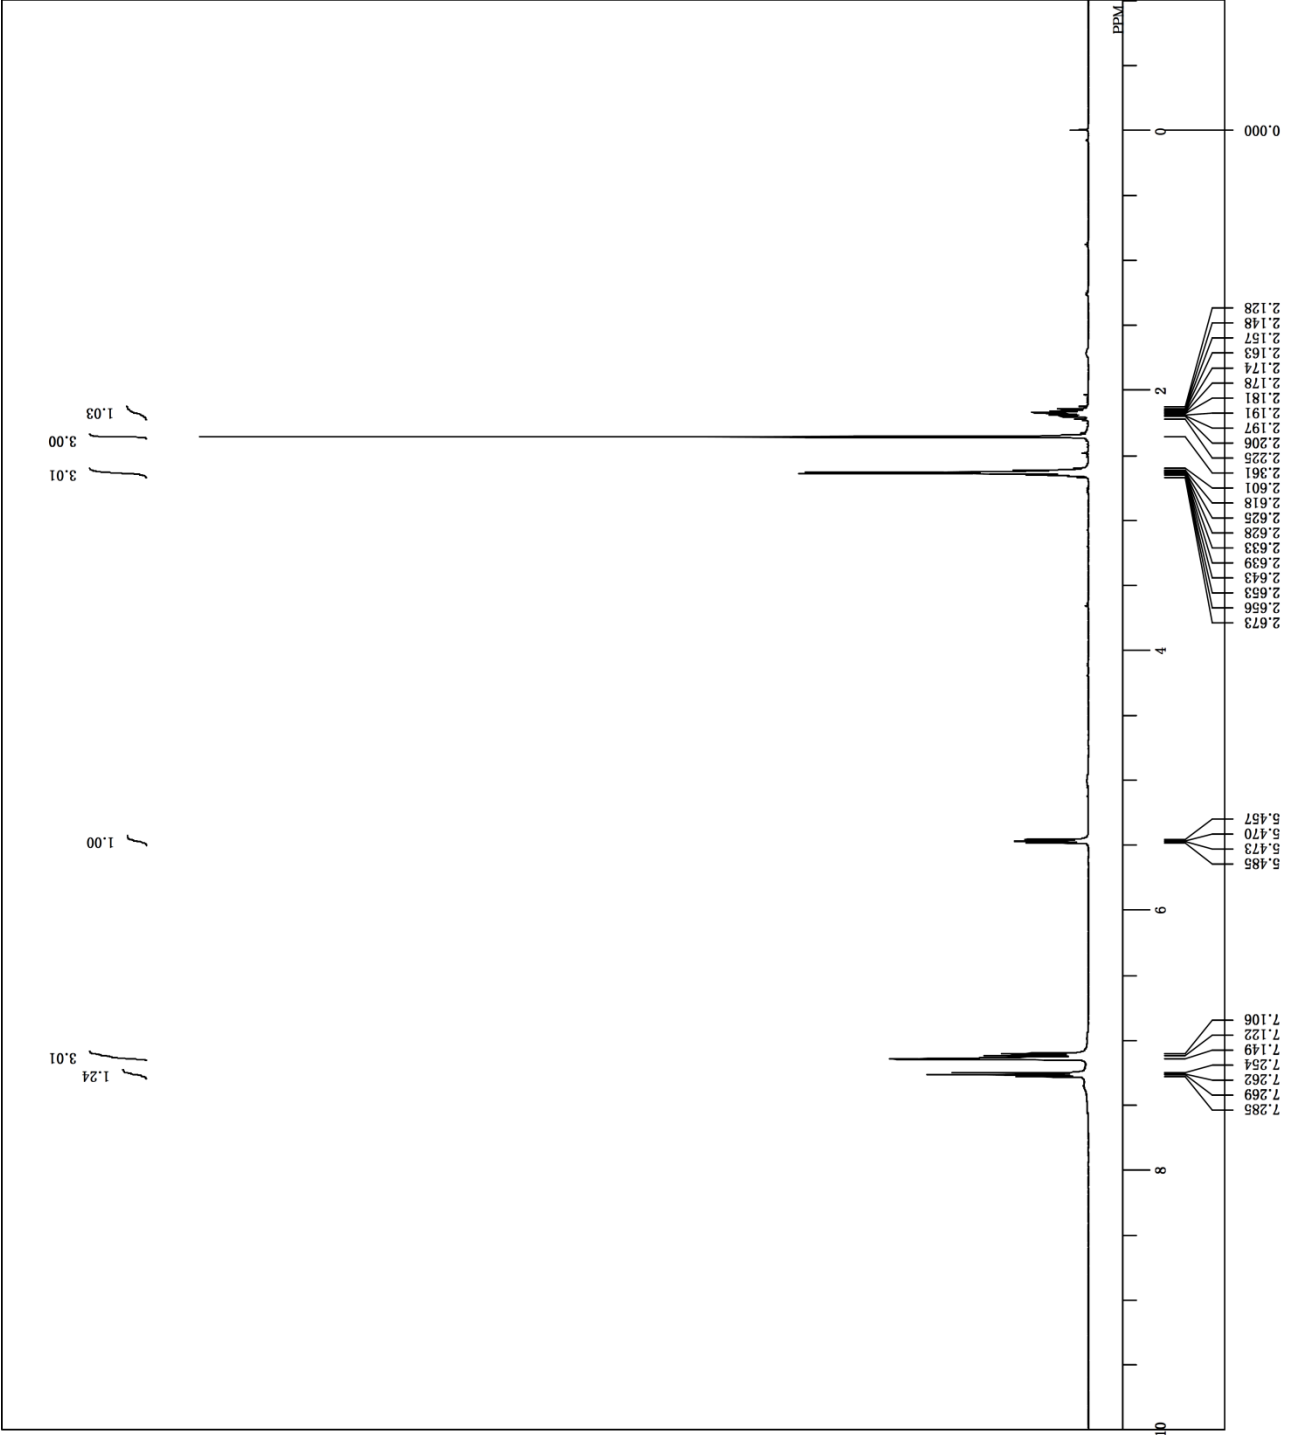

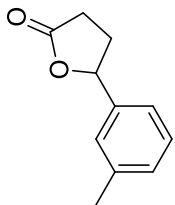

2c

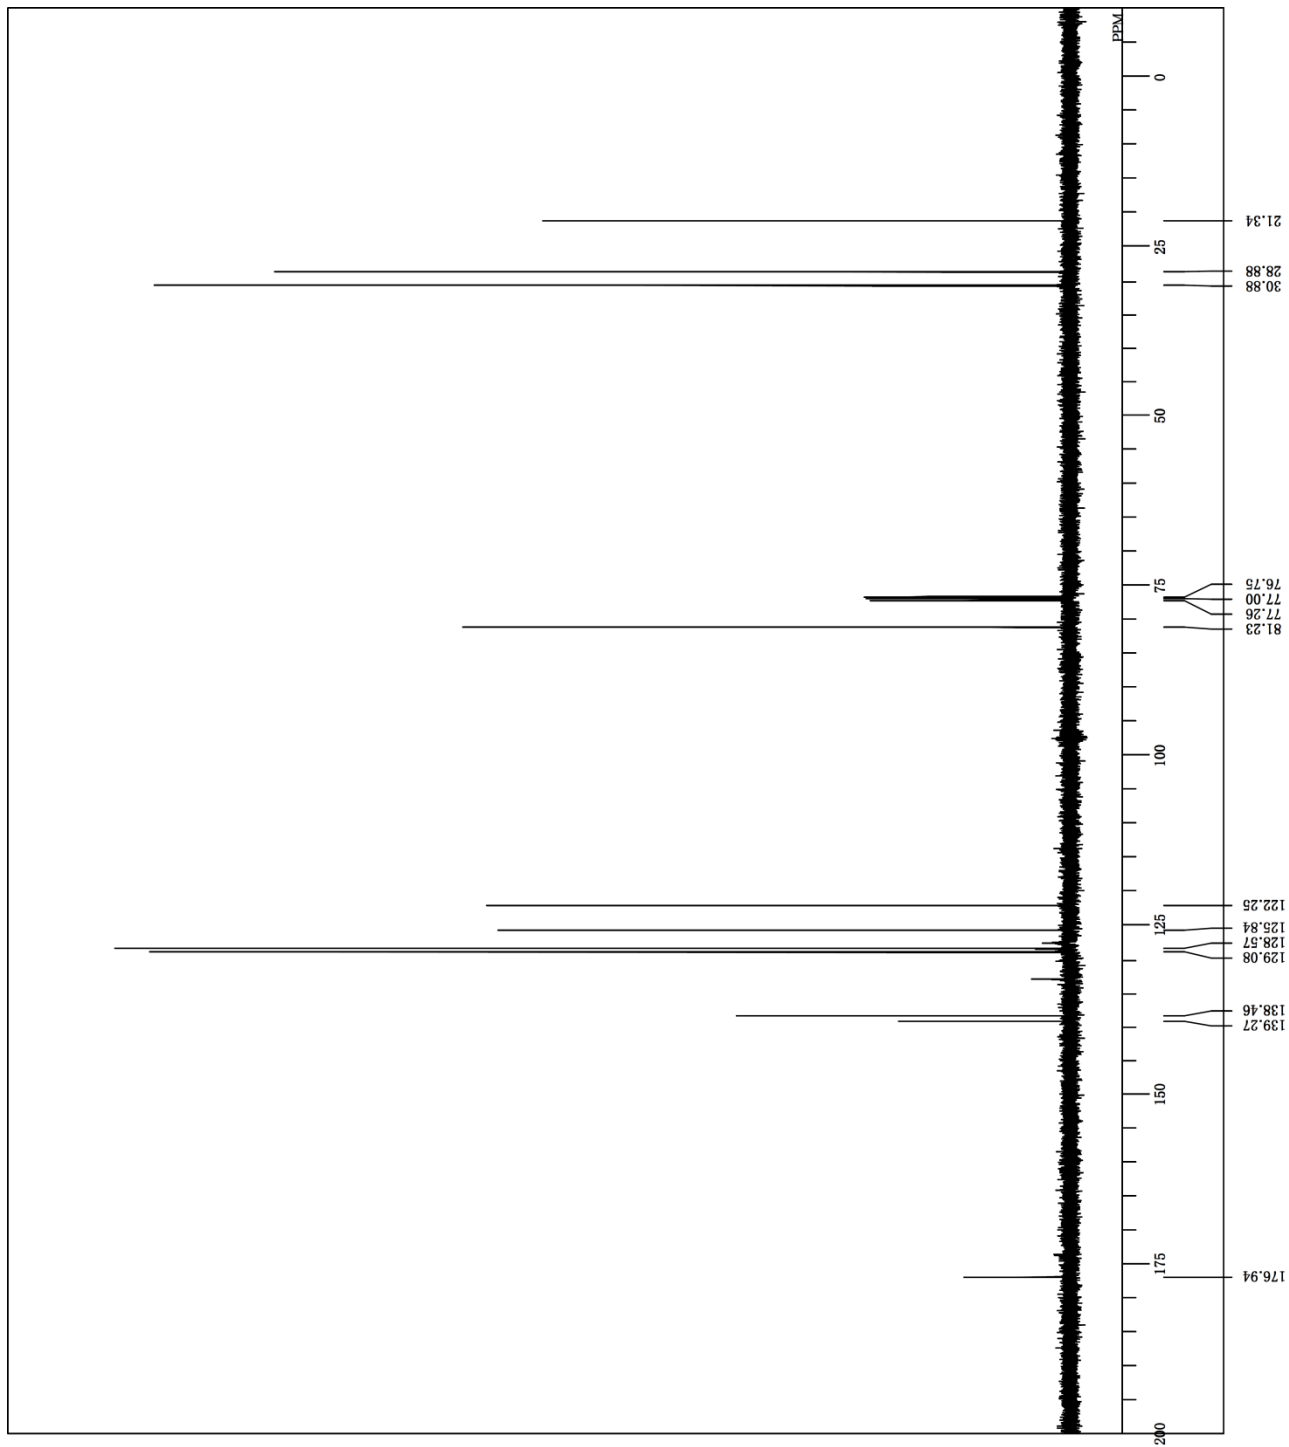

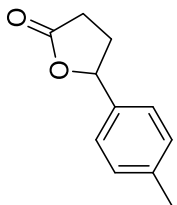

2d

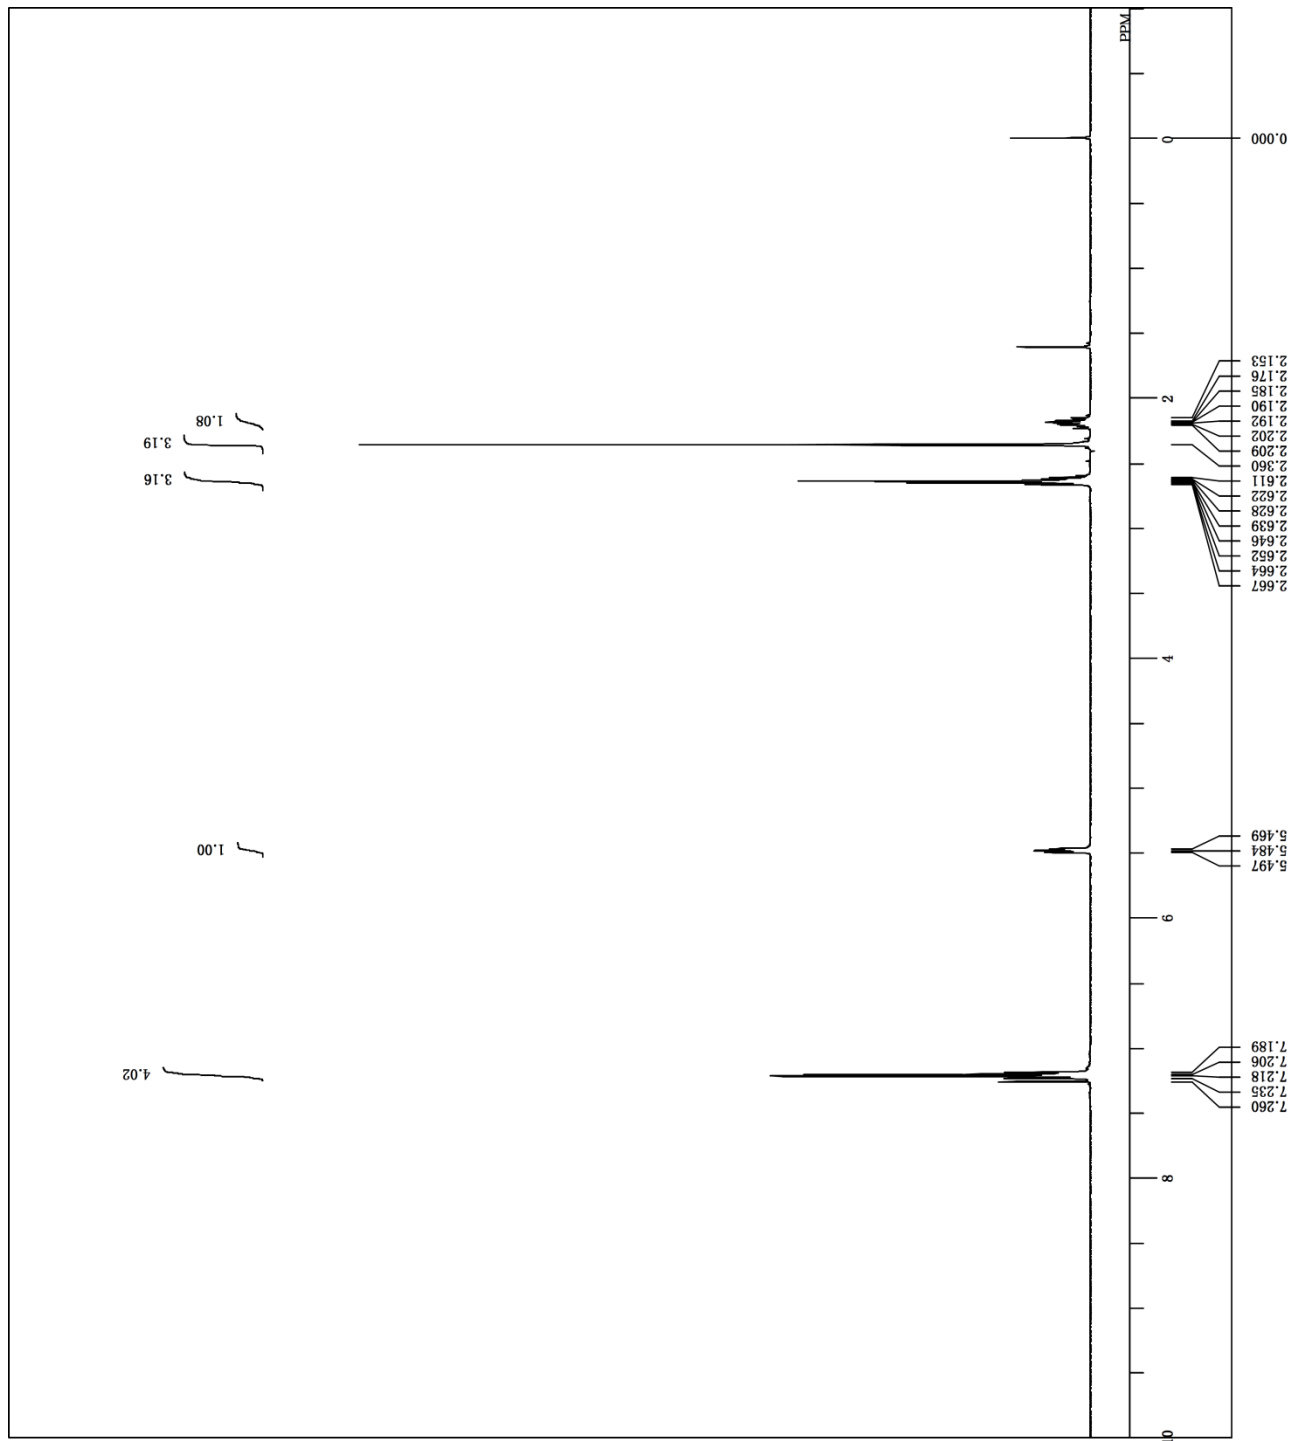



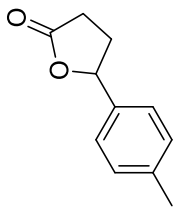

2d

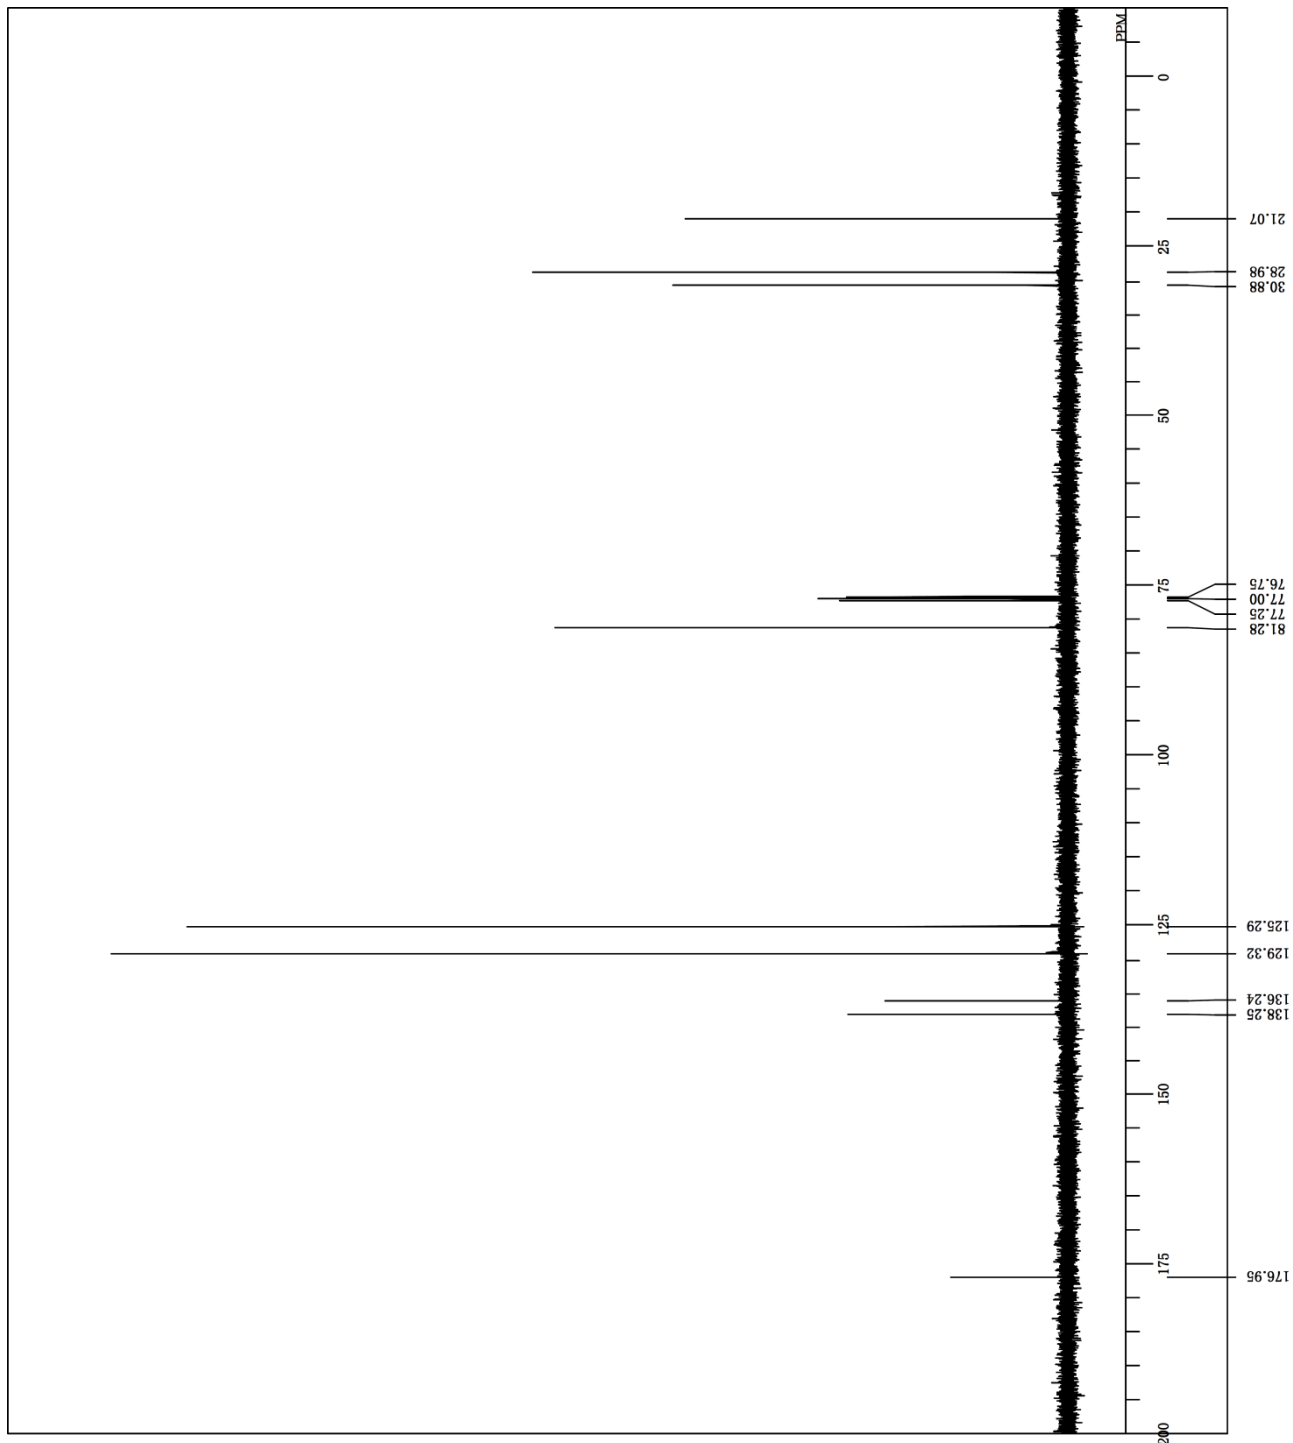

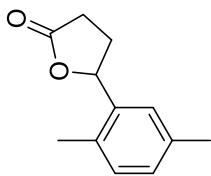

2e

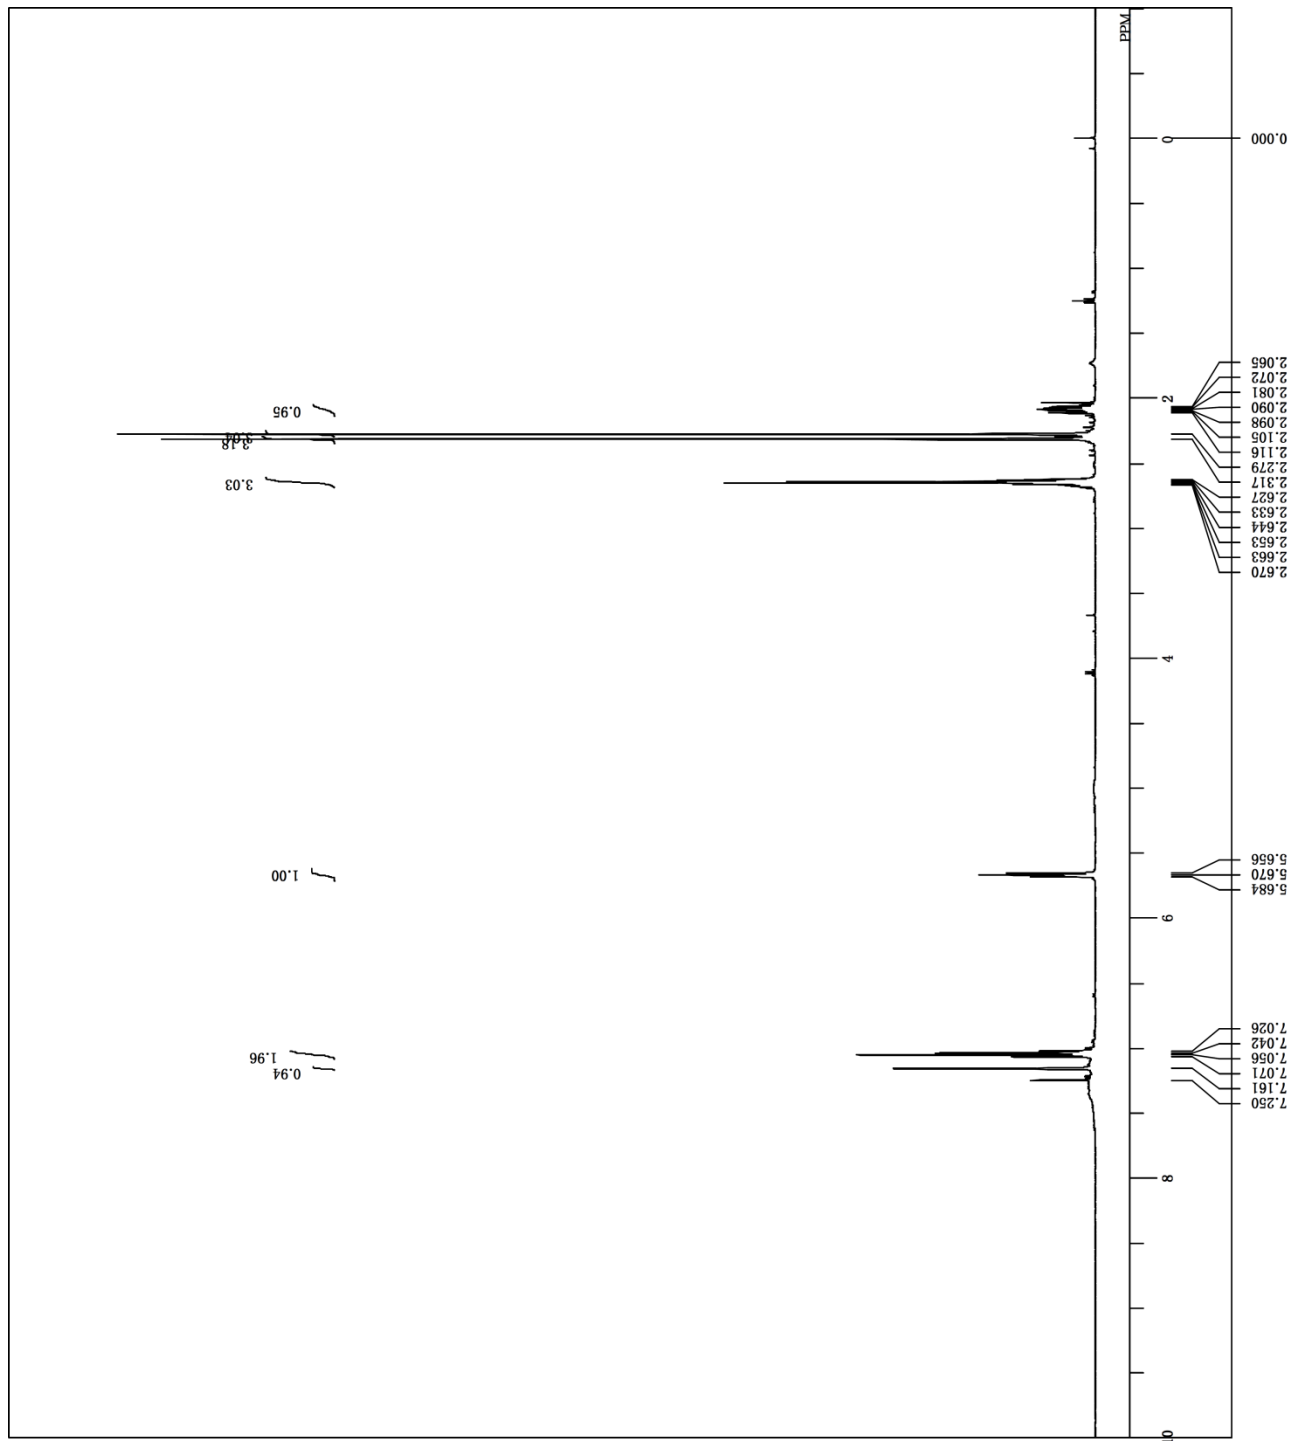

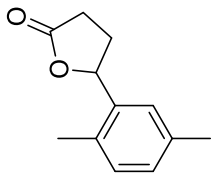

**2e**

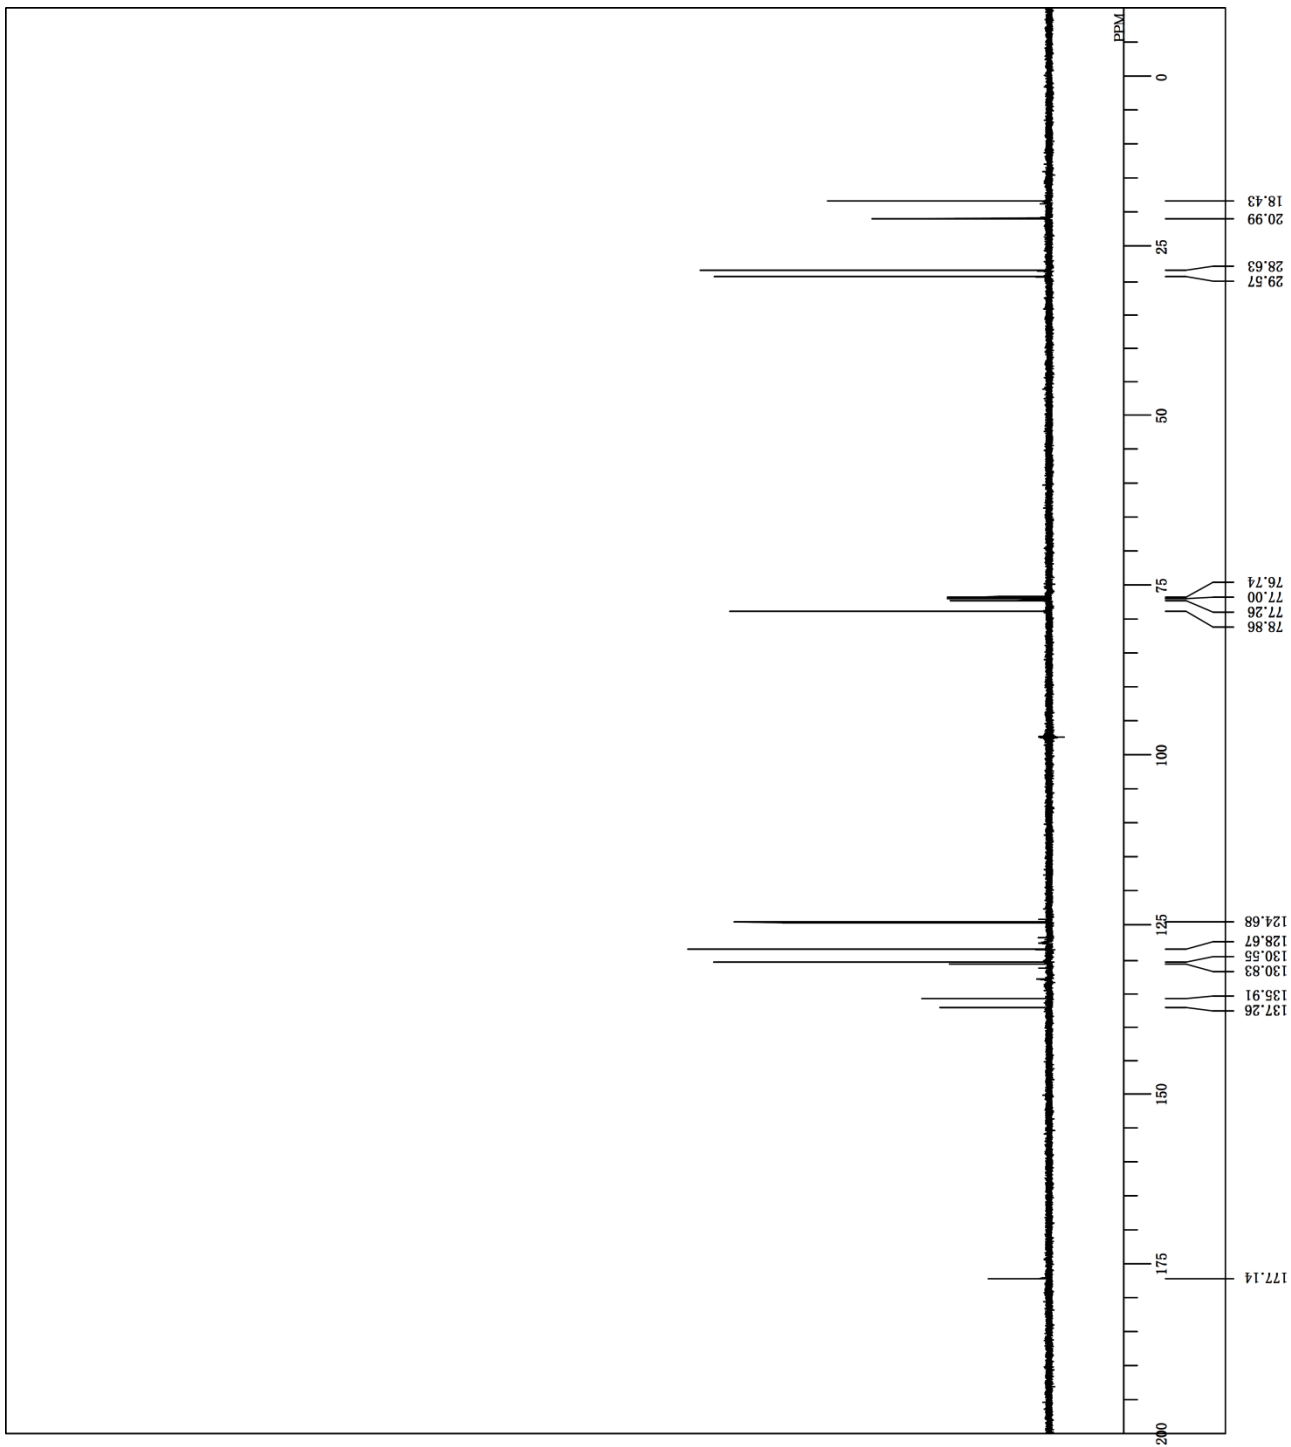

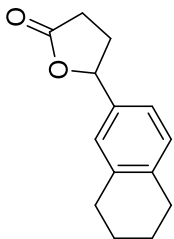

2f

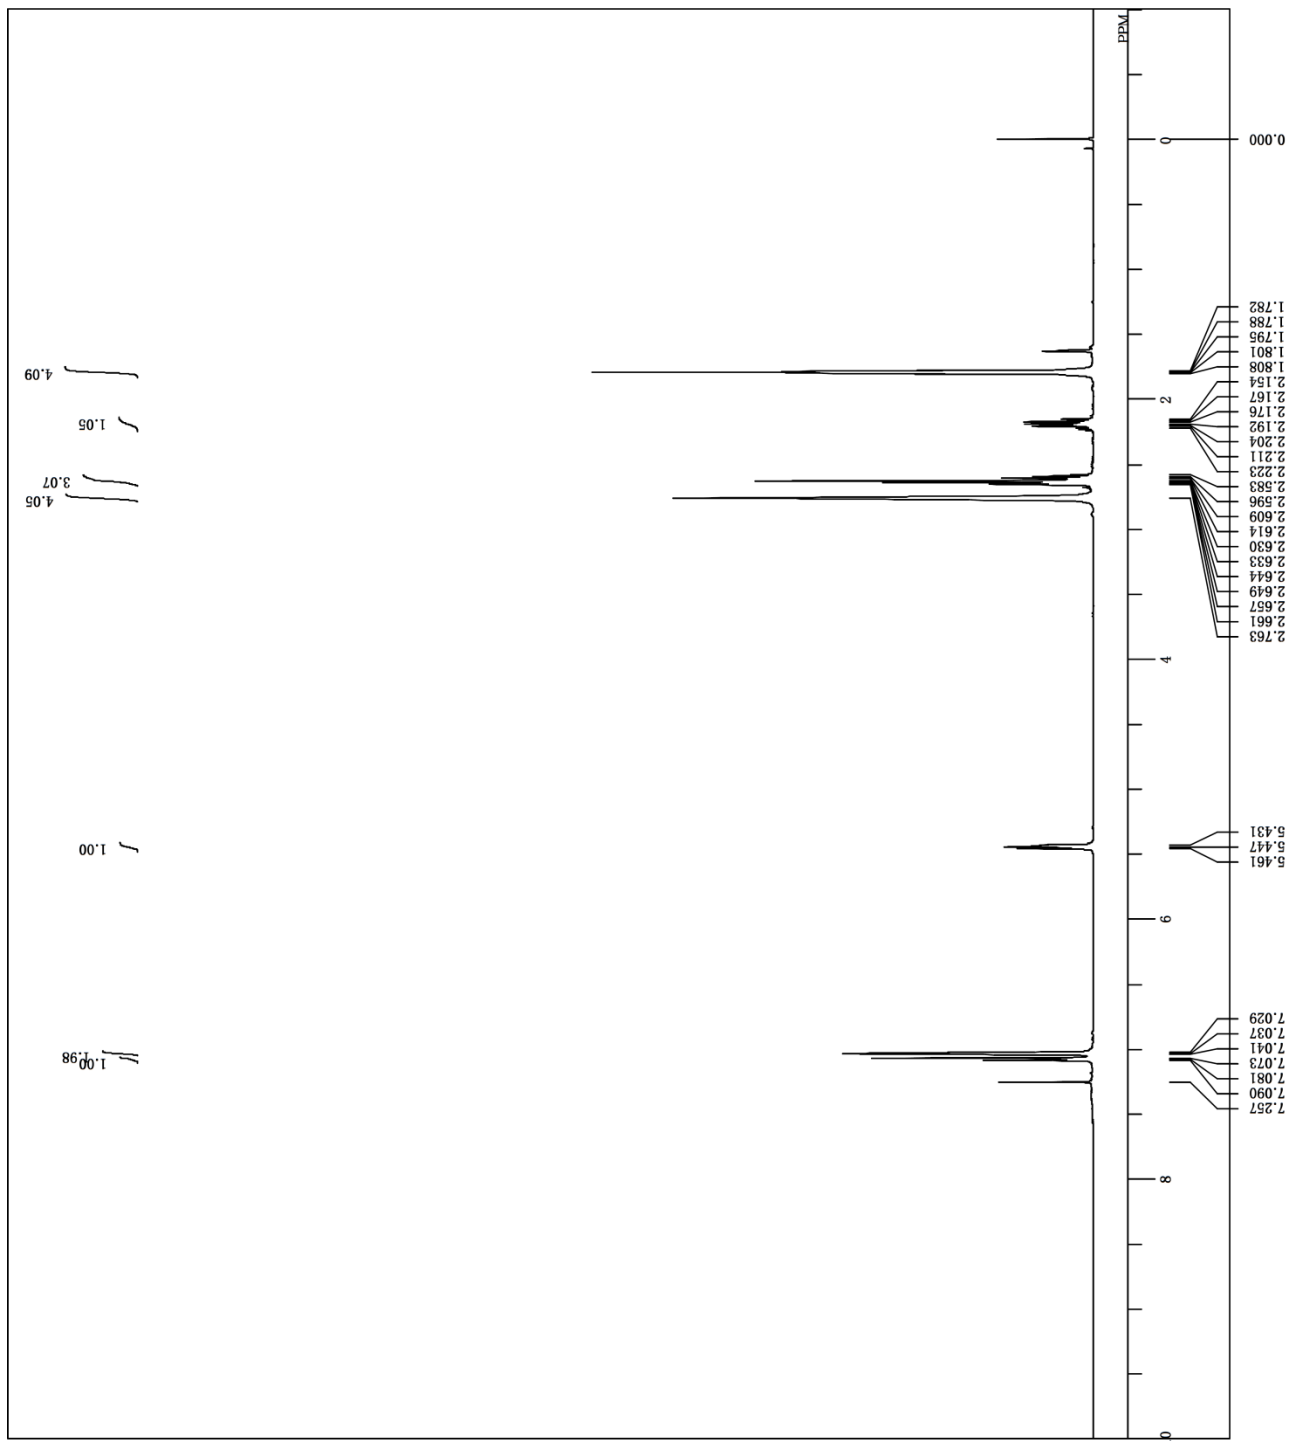

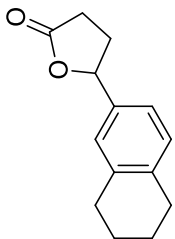

2f

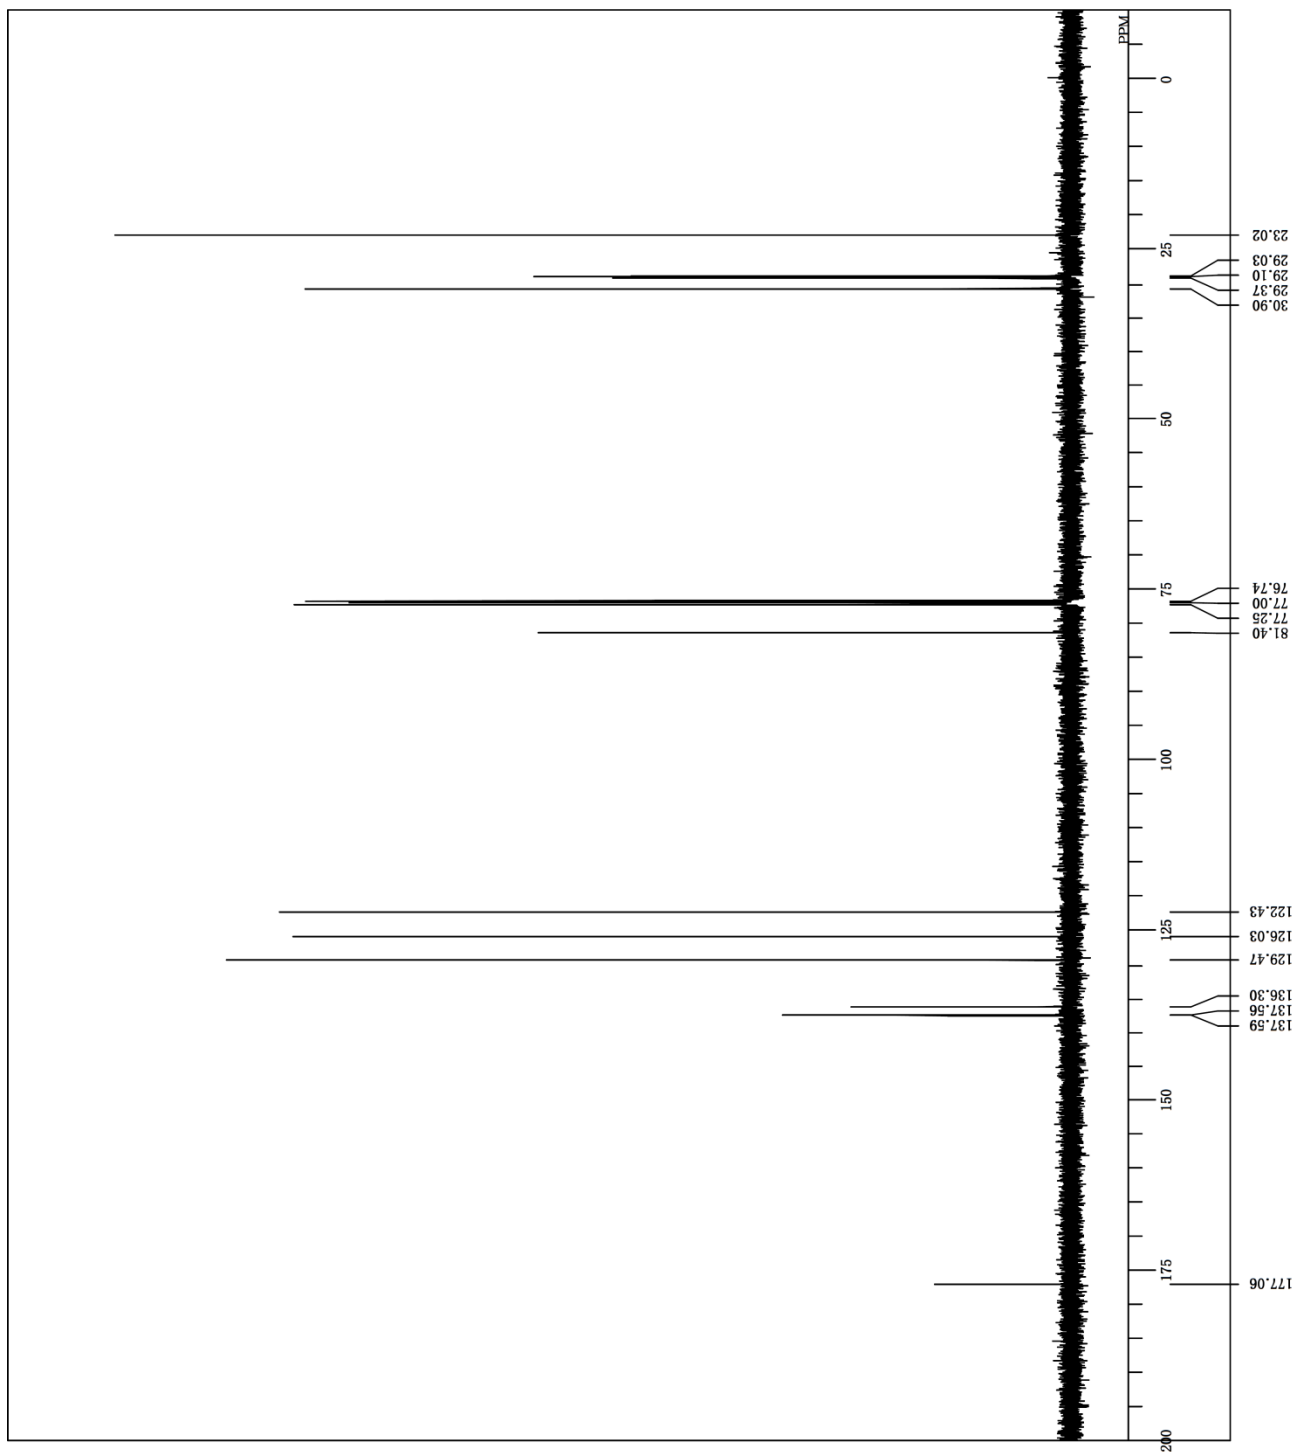

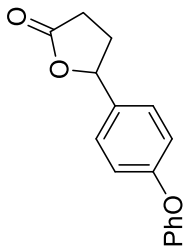

2h

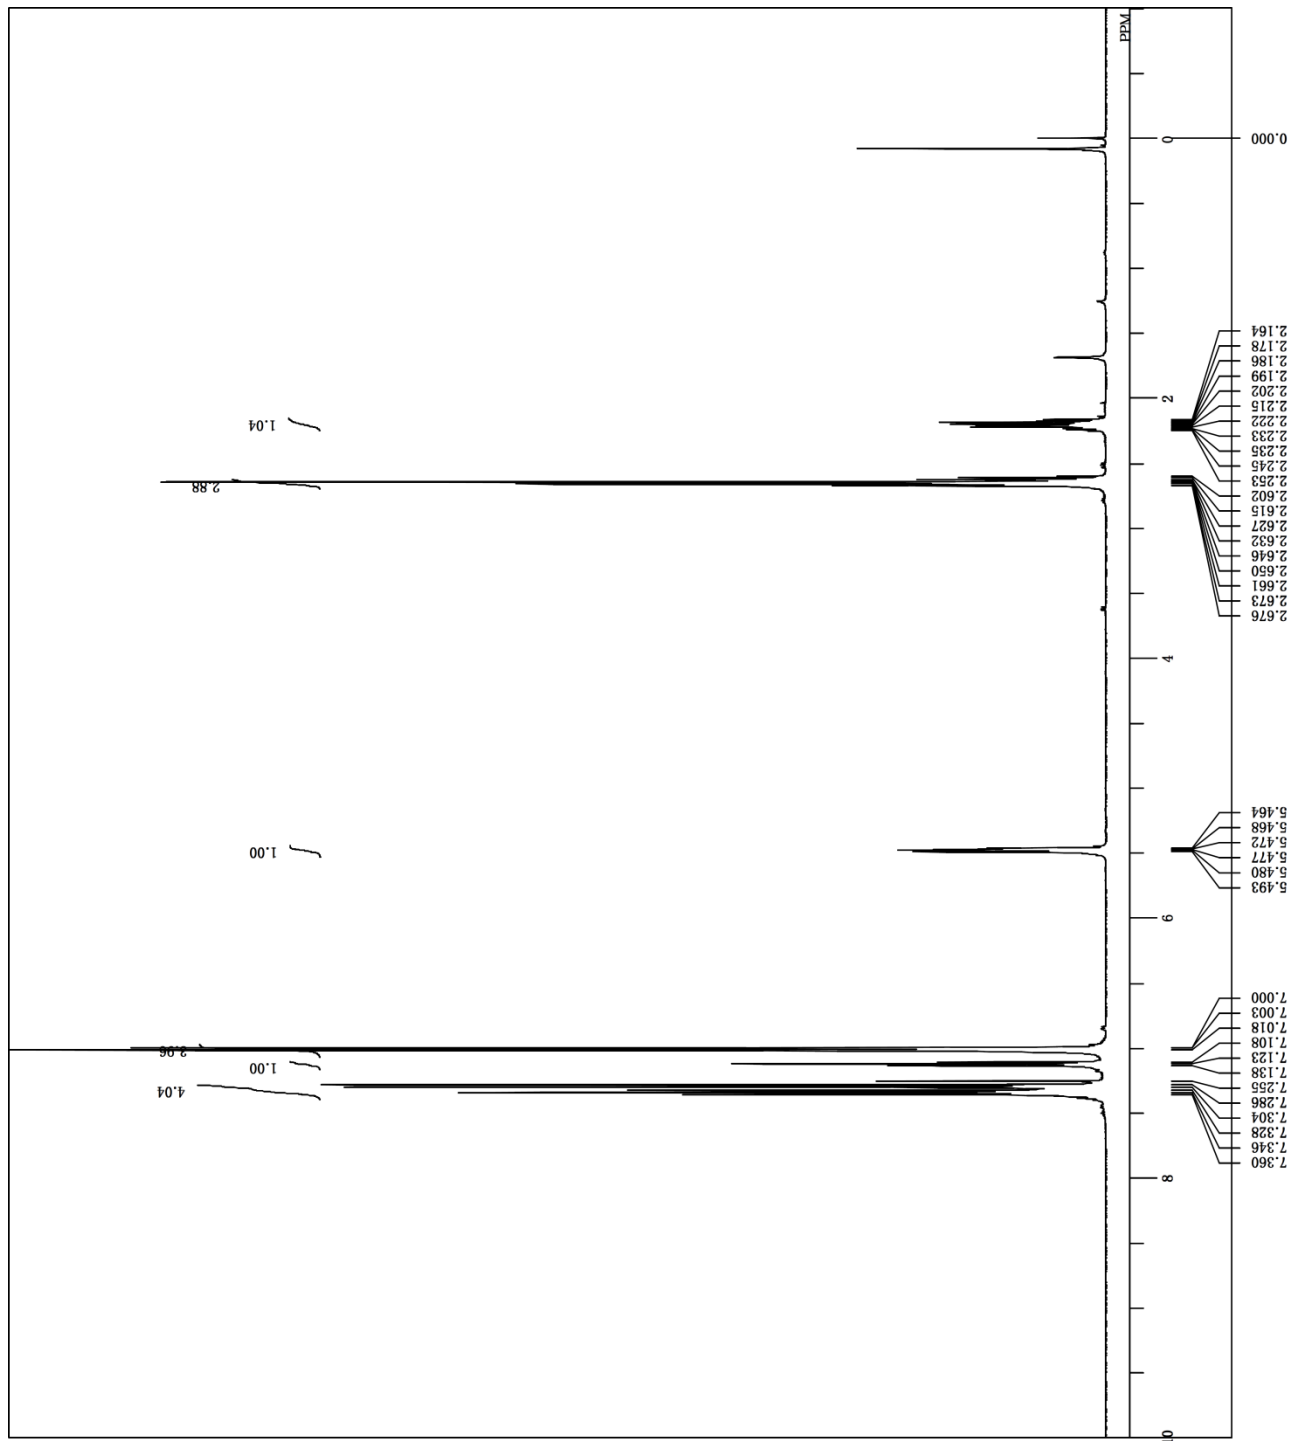

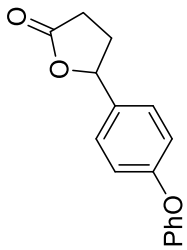

2h

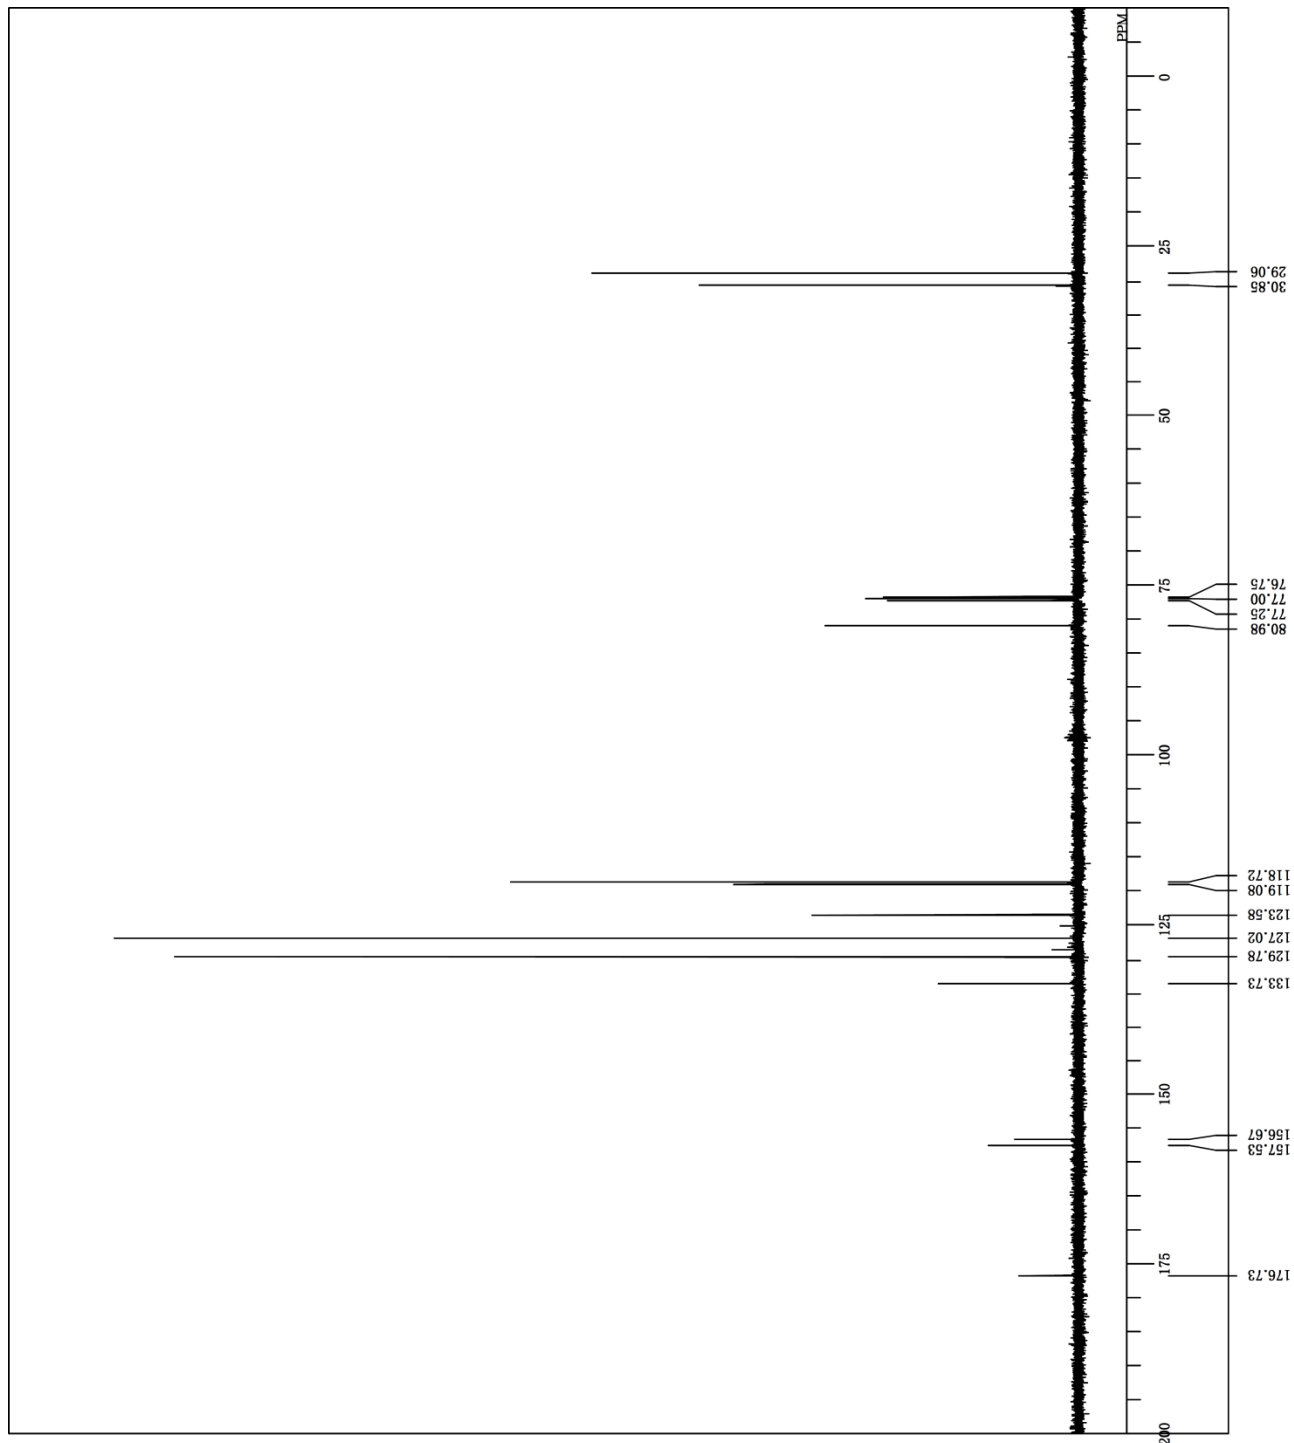

S55

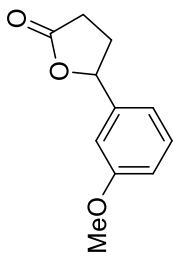

2i

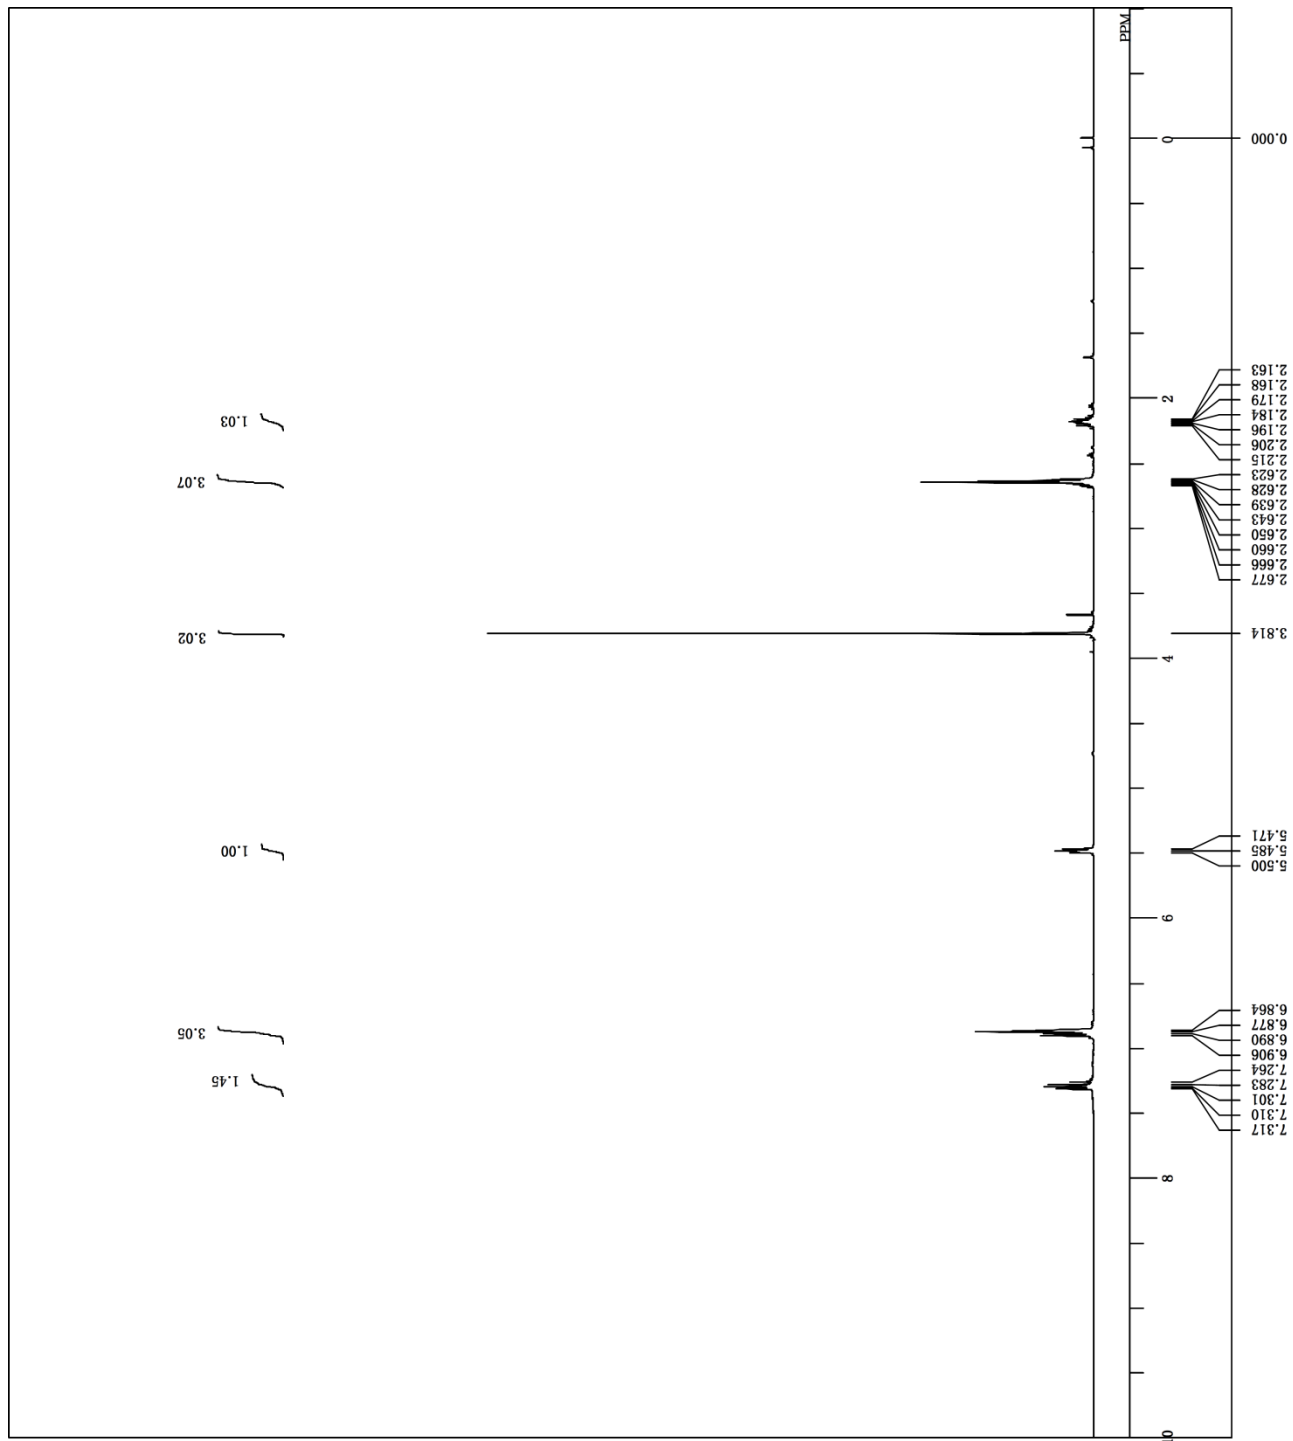





2i

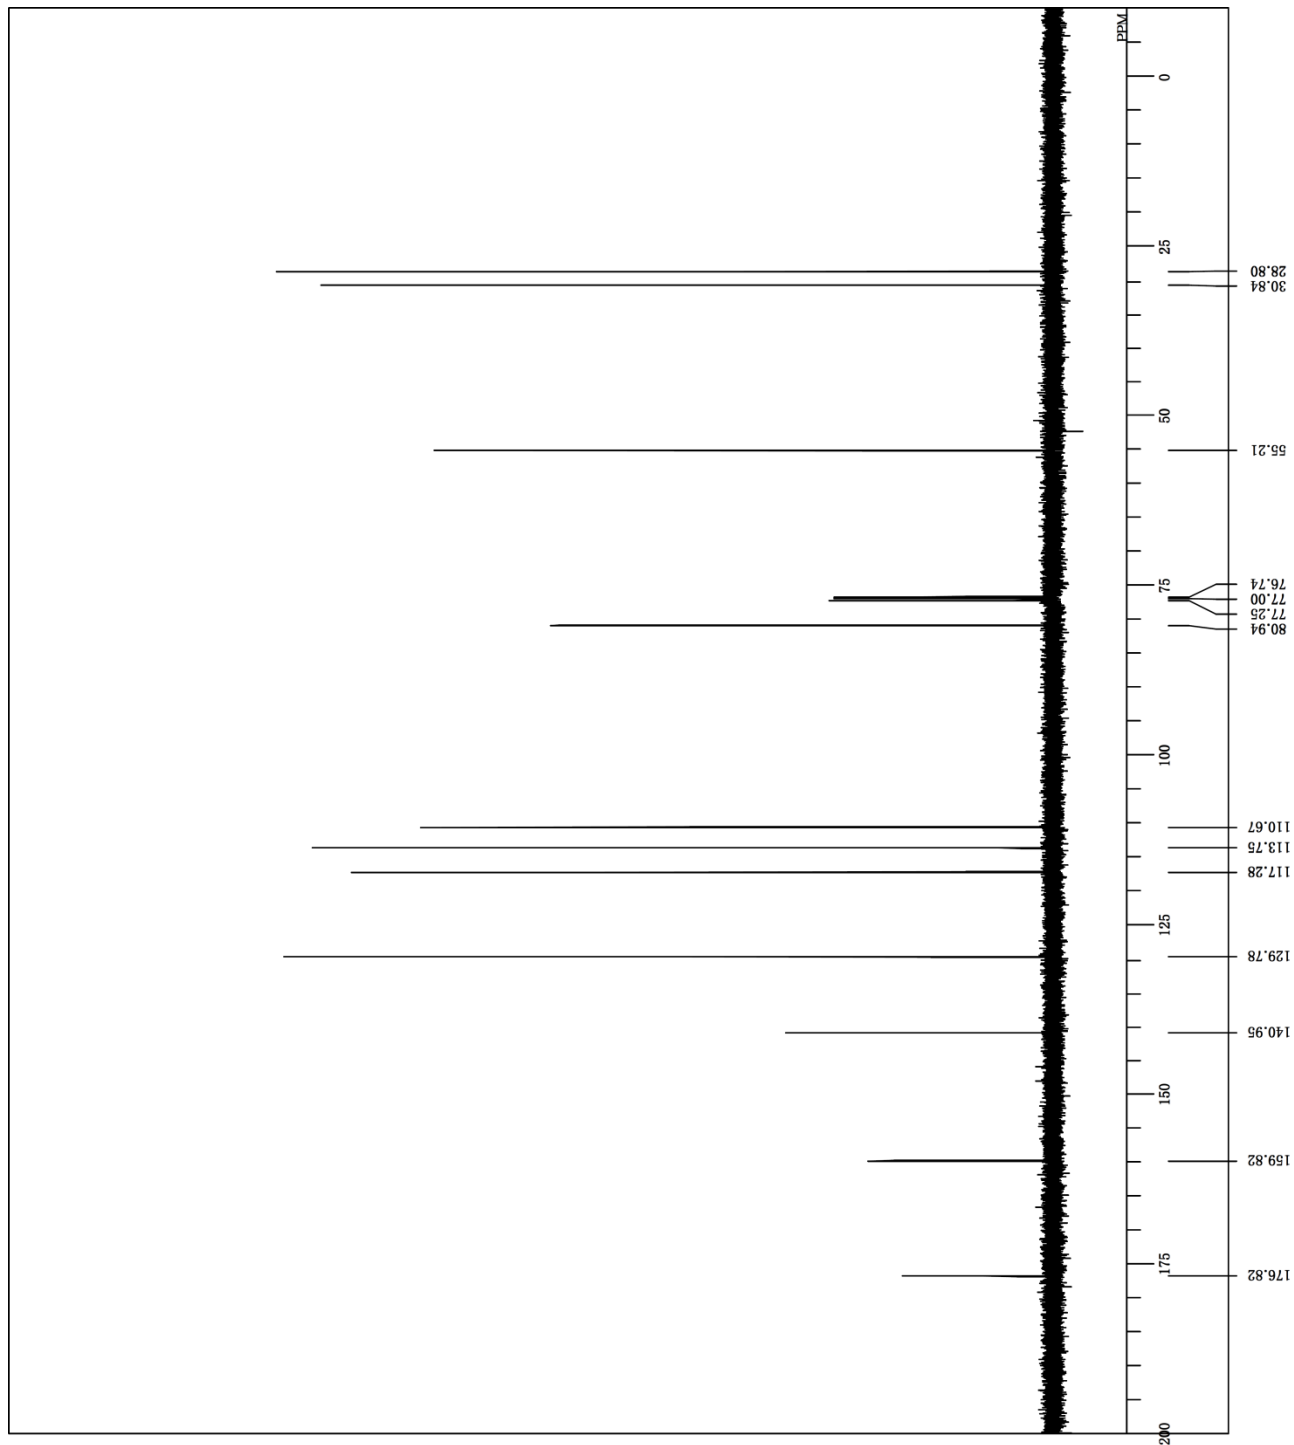

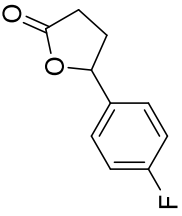

2j

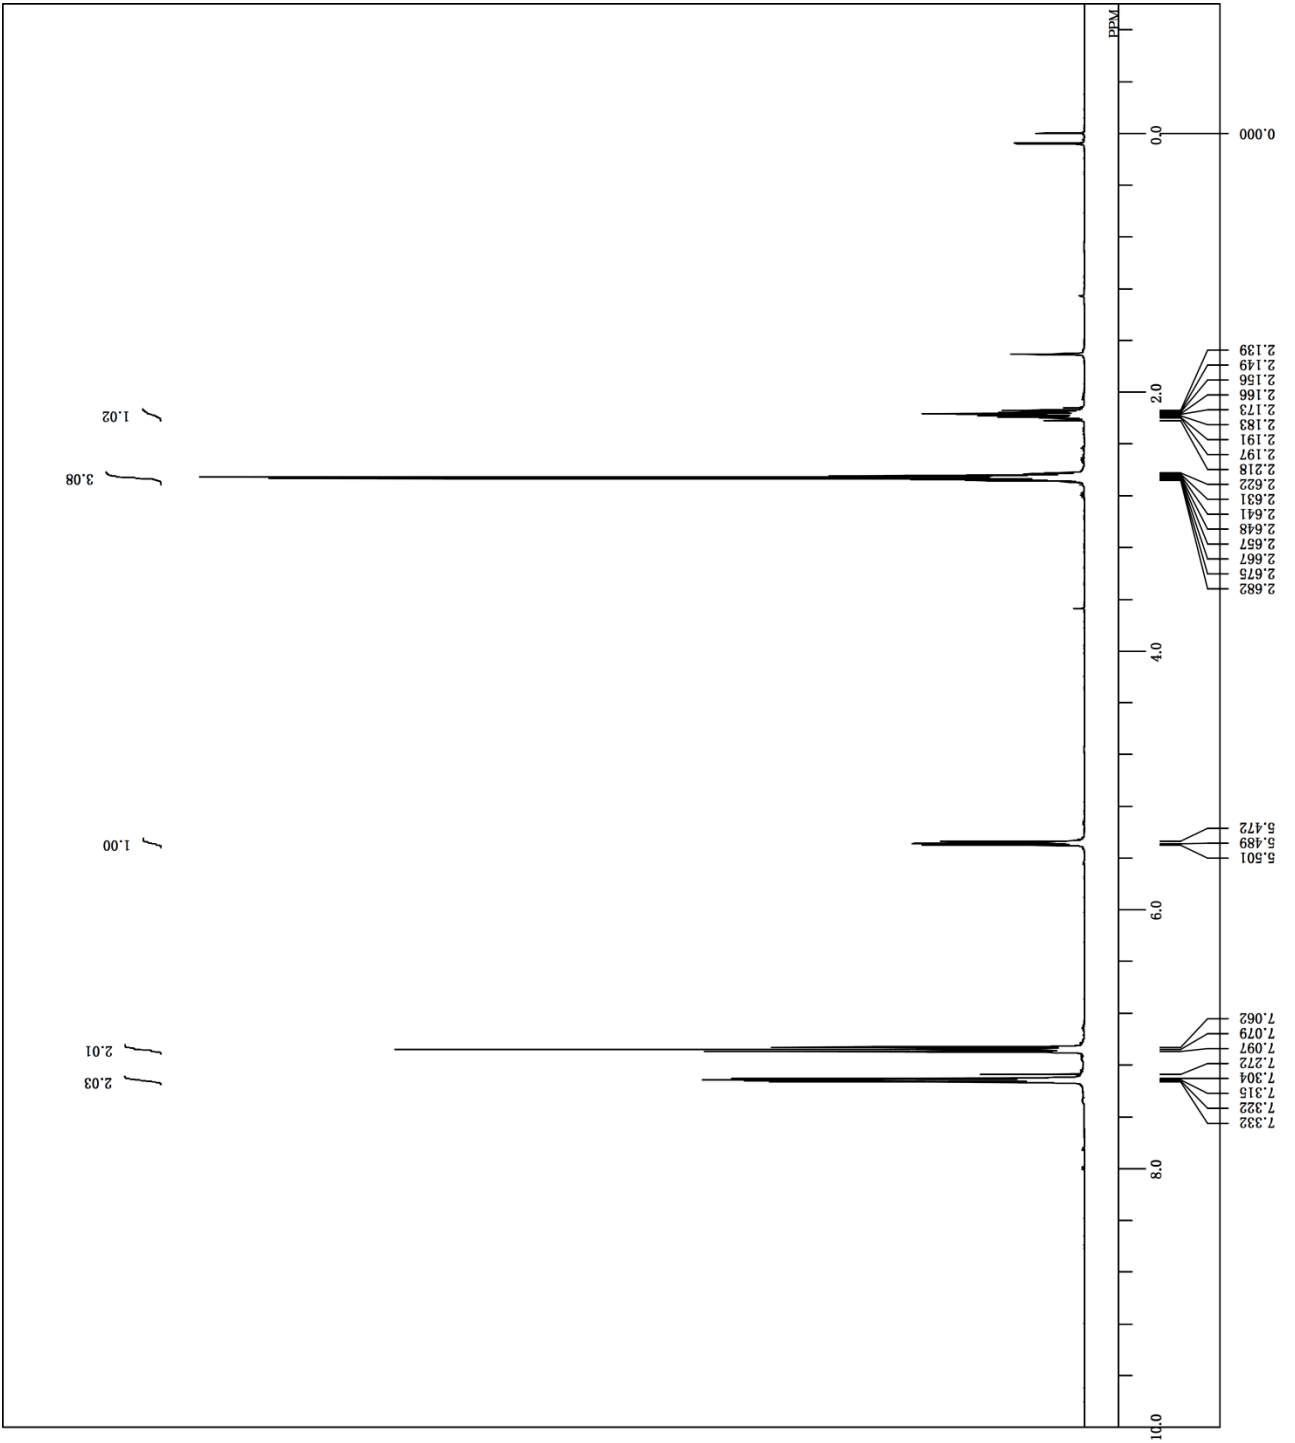

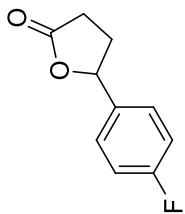

2j

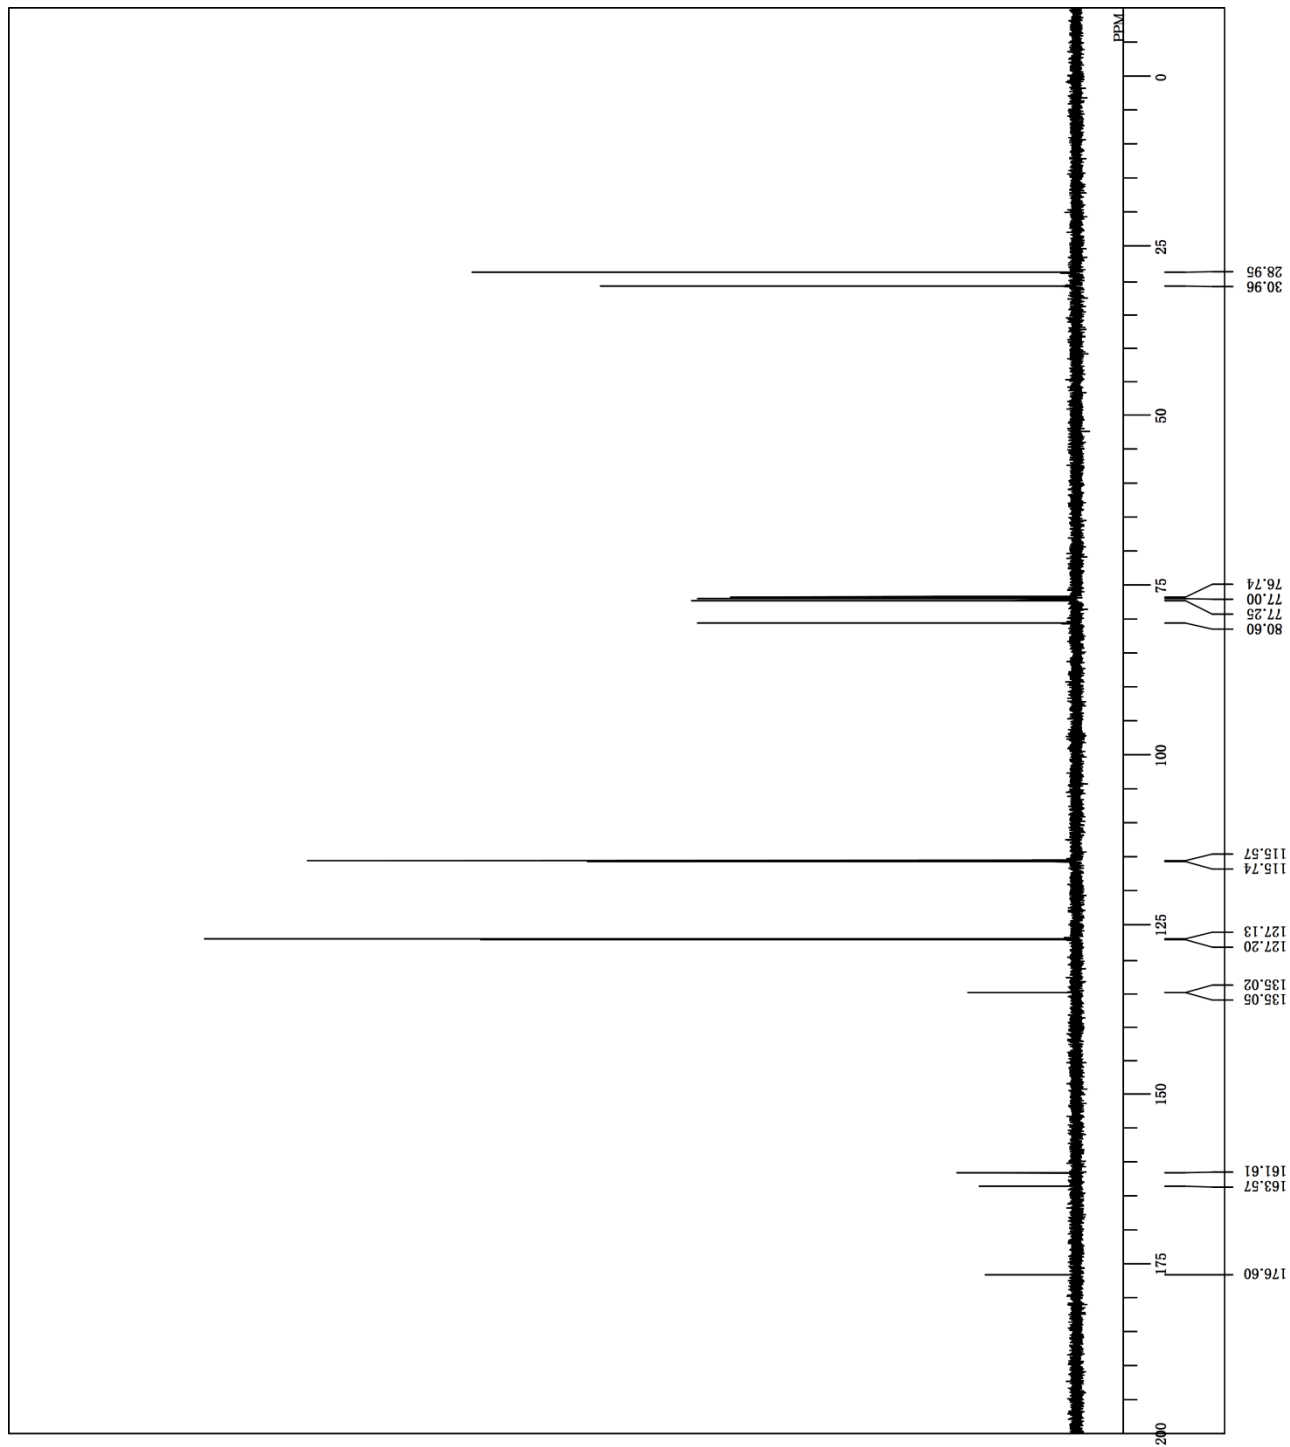

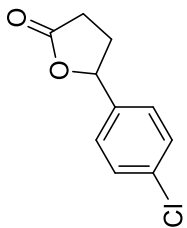

2k

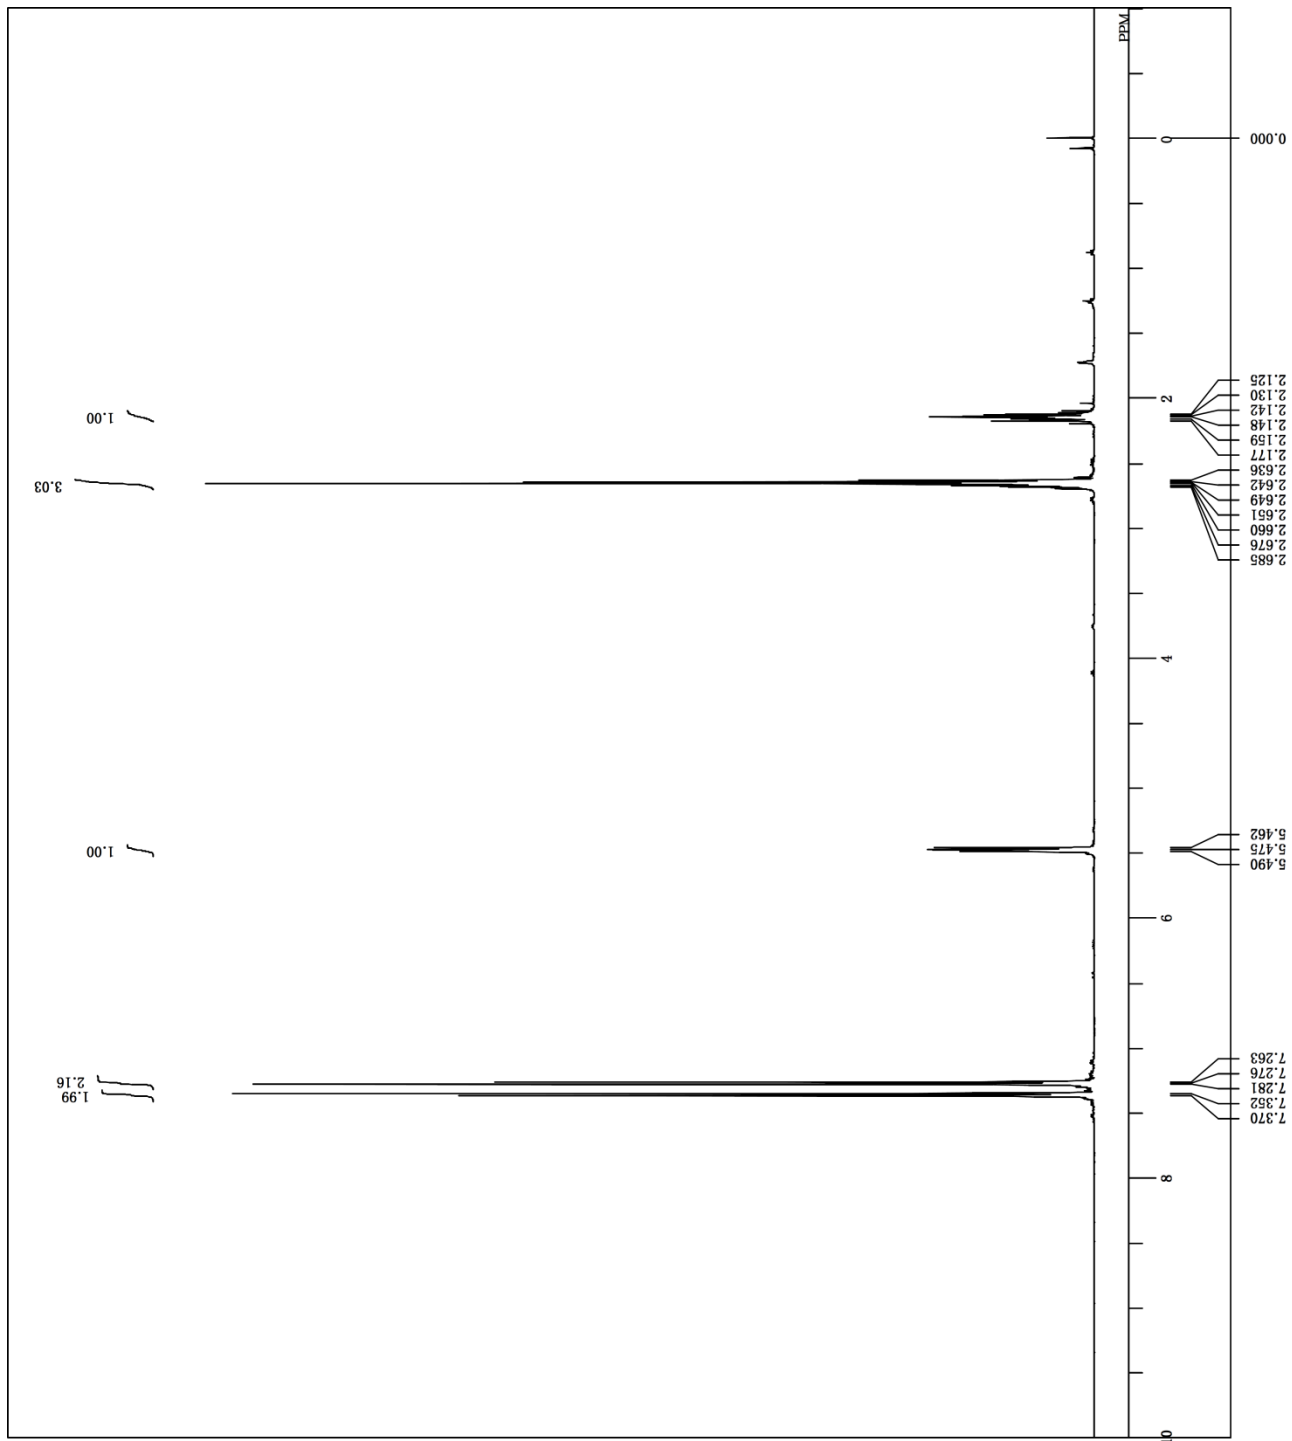



2k

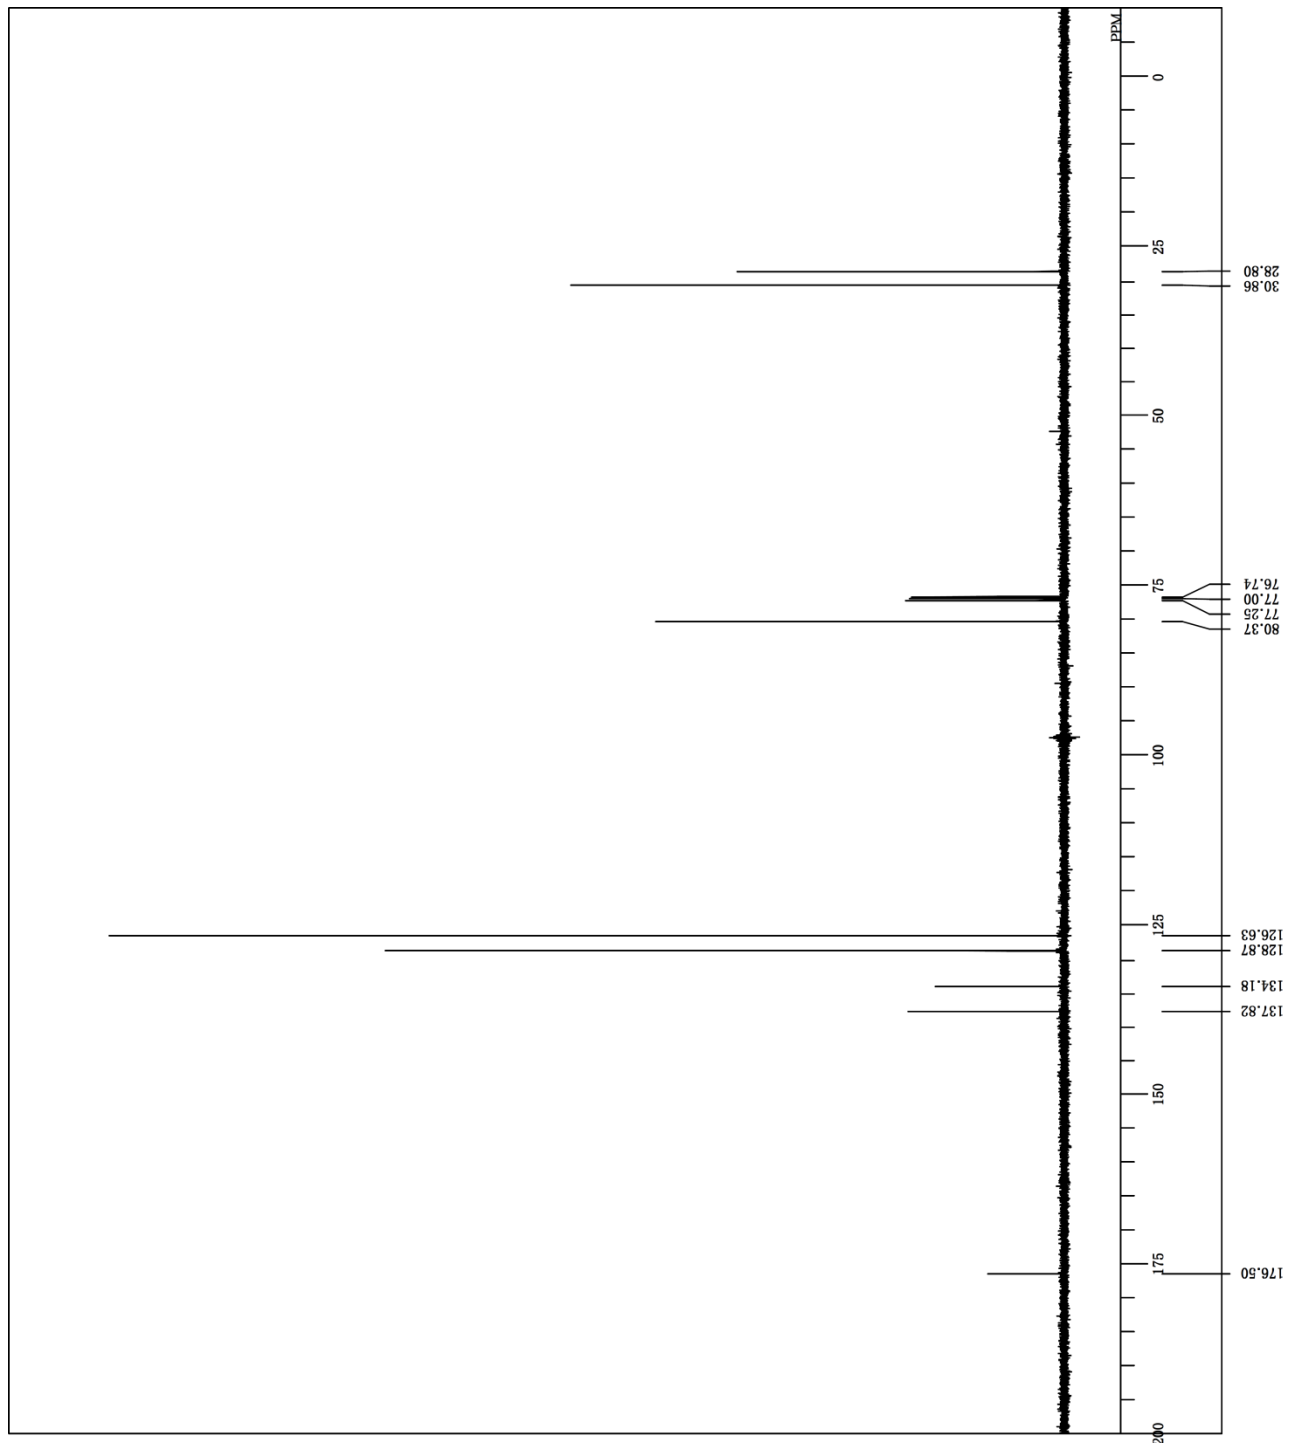

S61

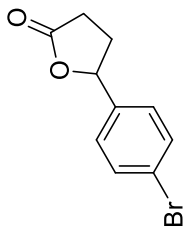

21

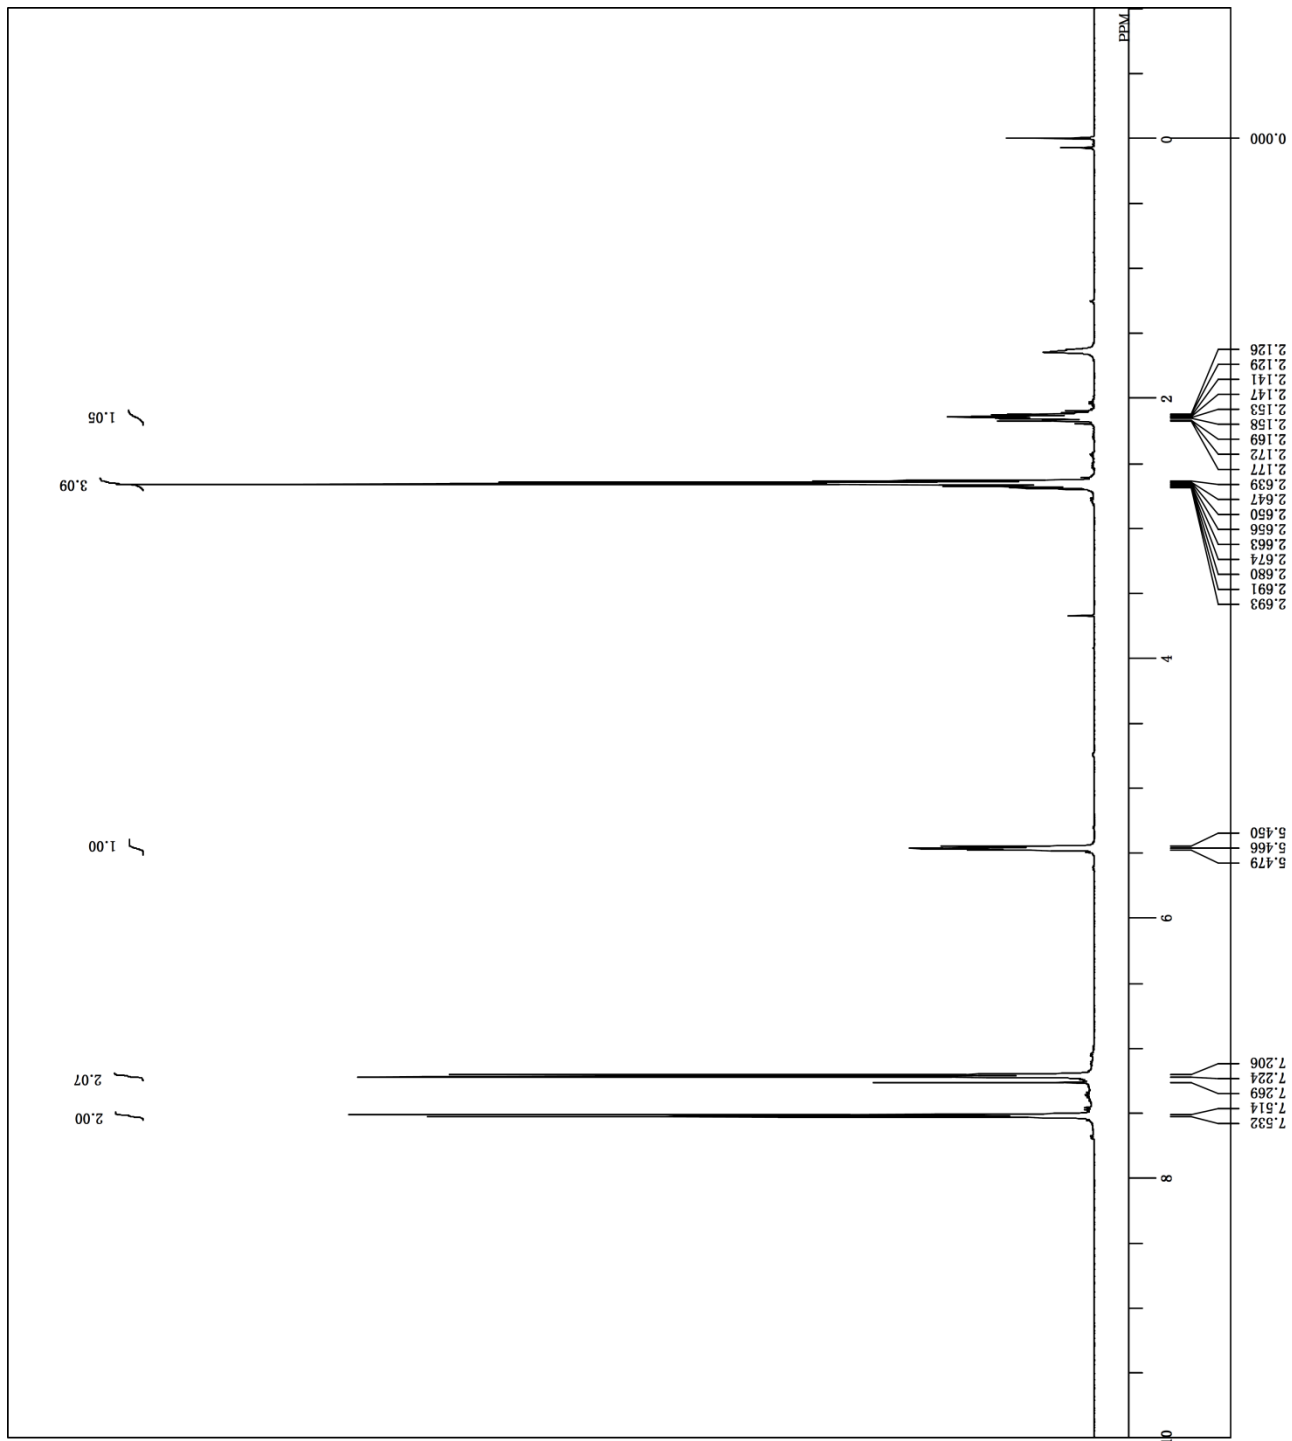



21

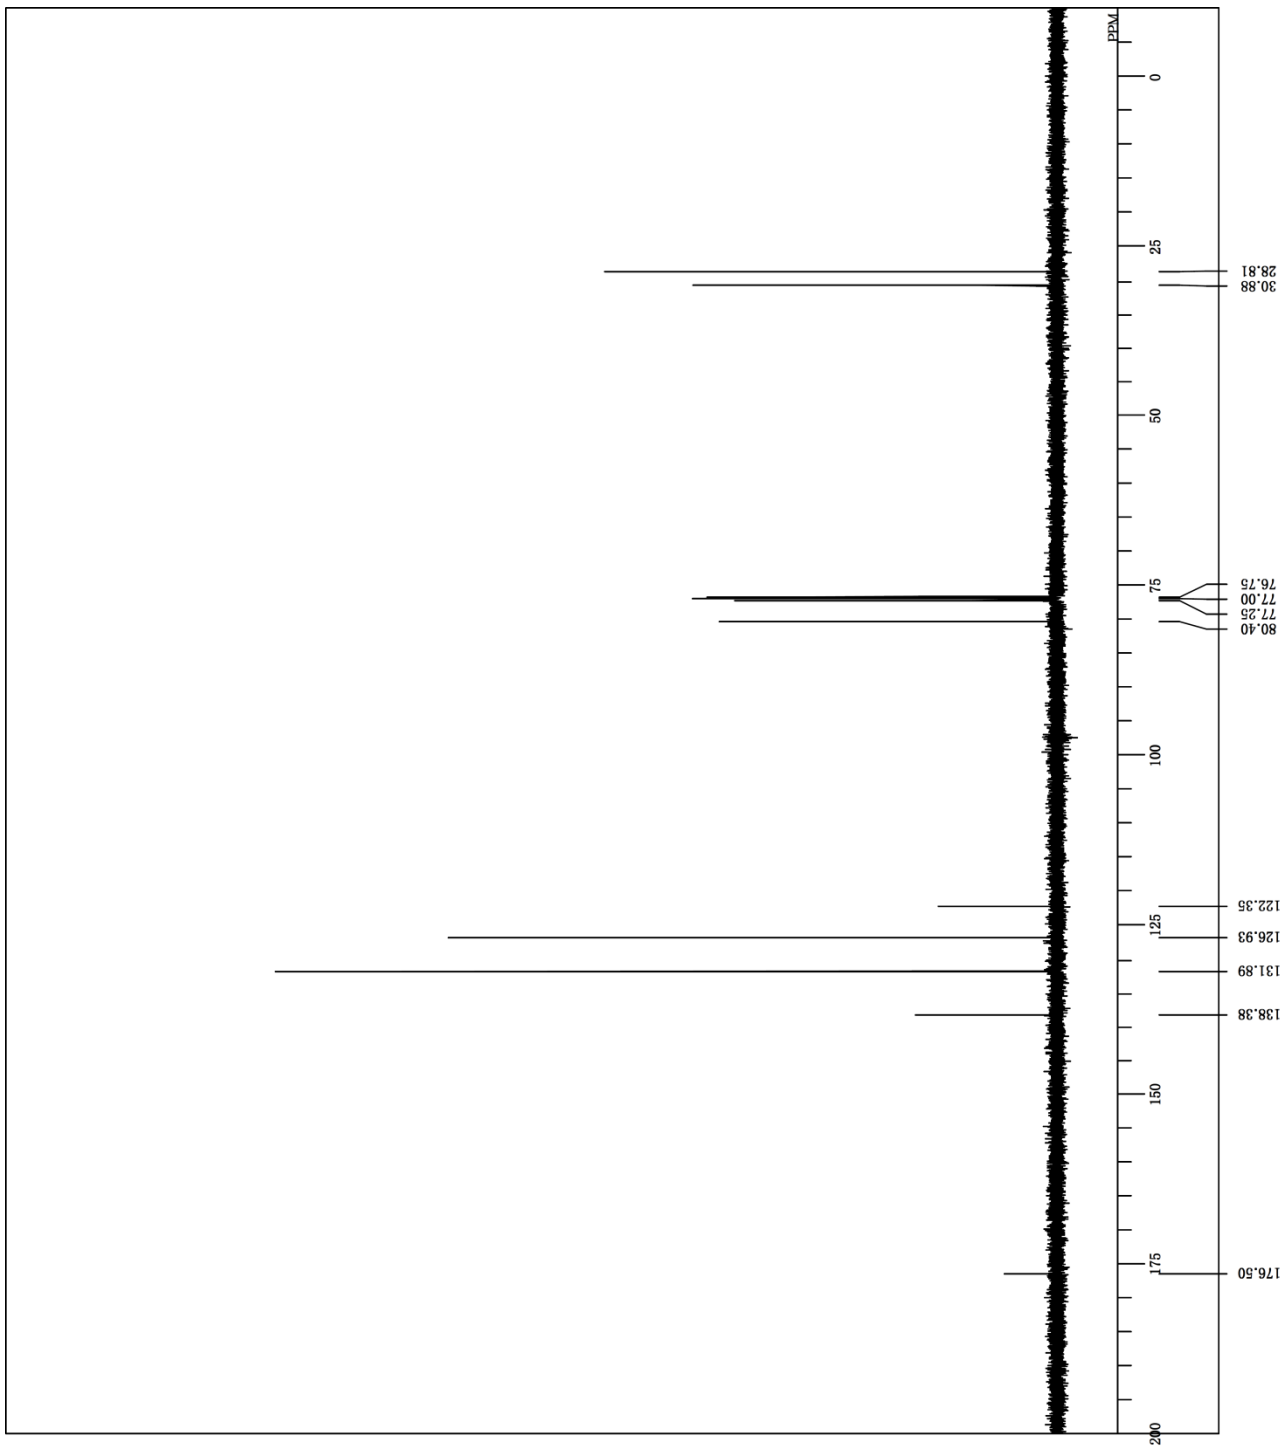

S63

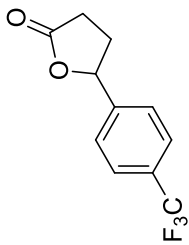

2m

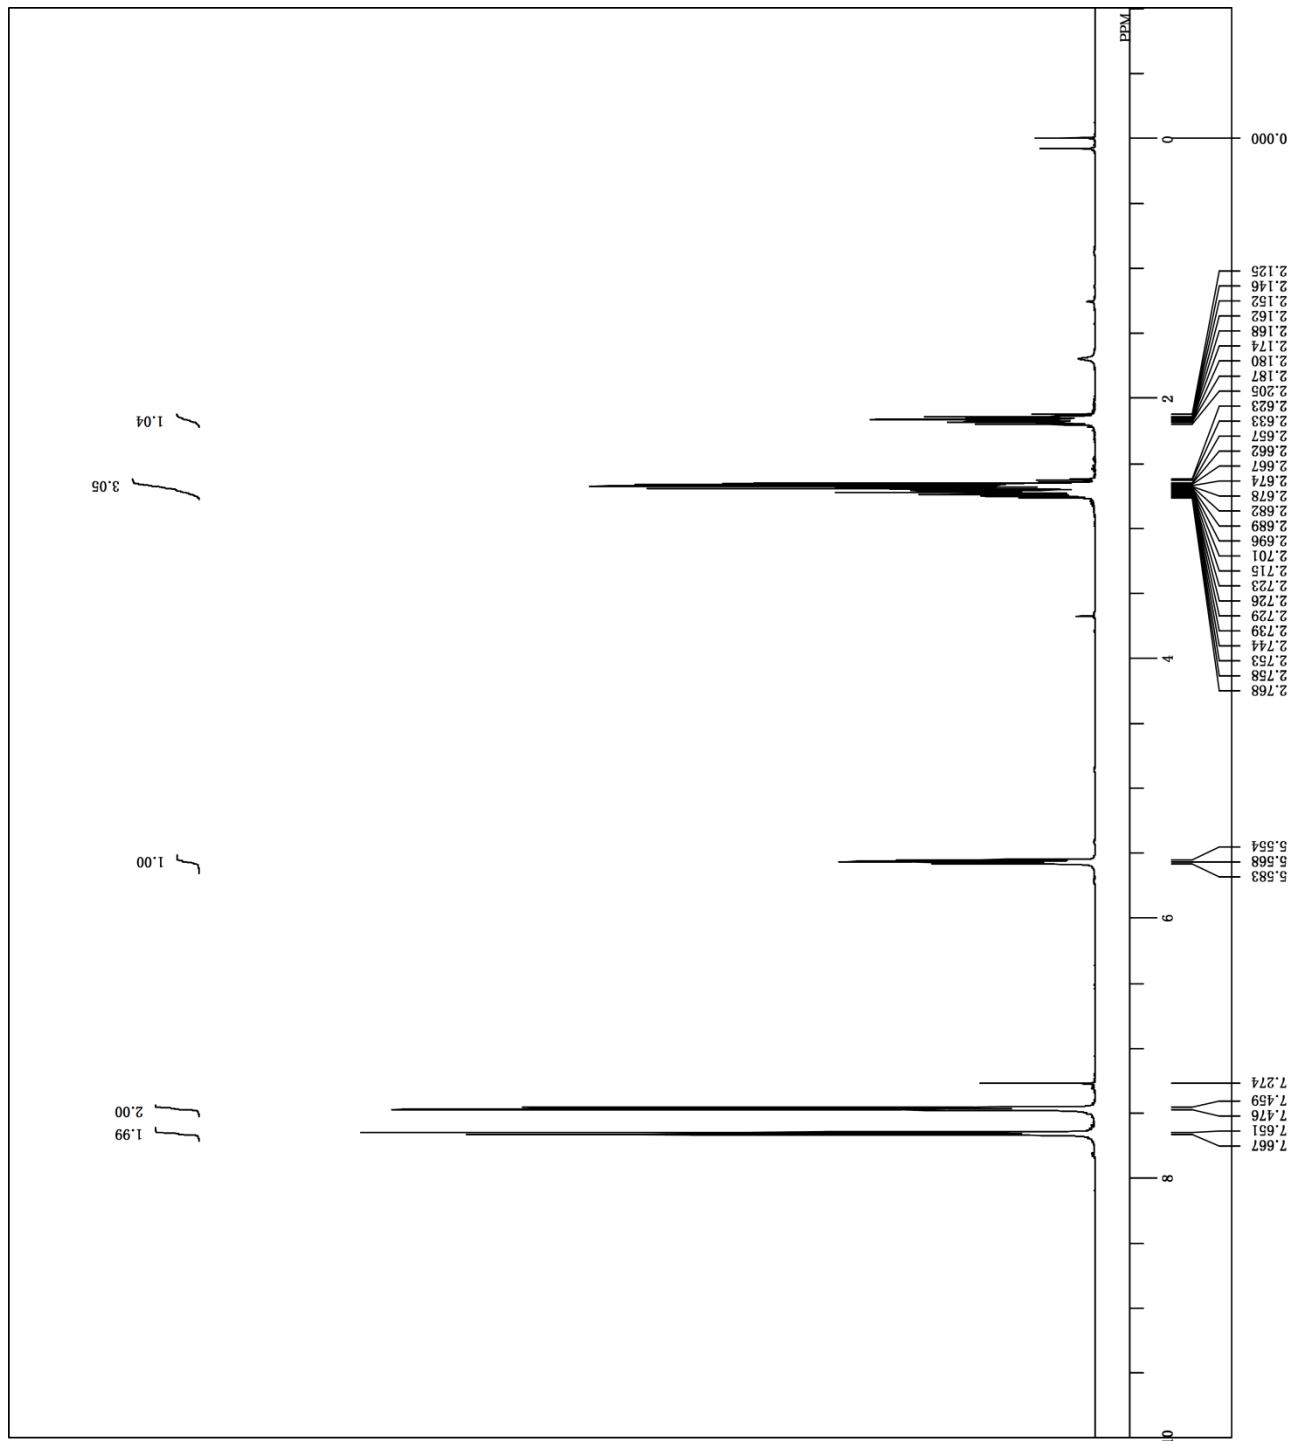





2m

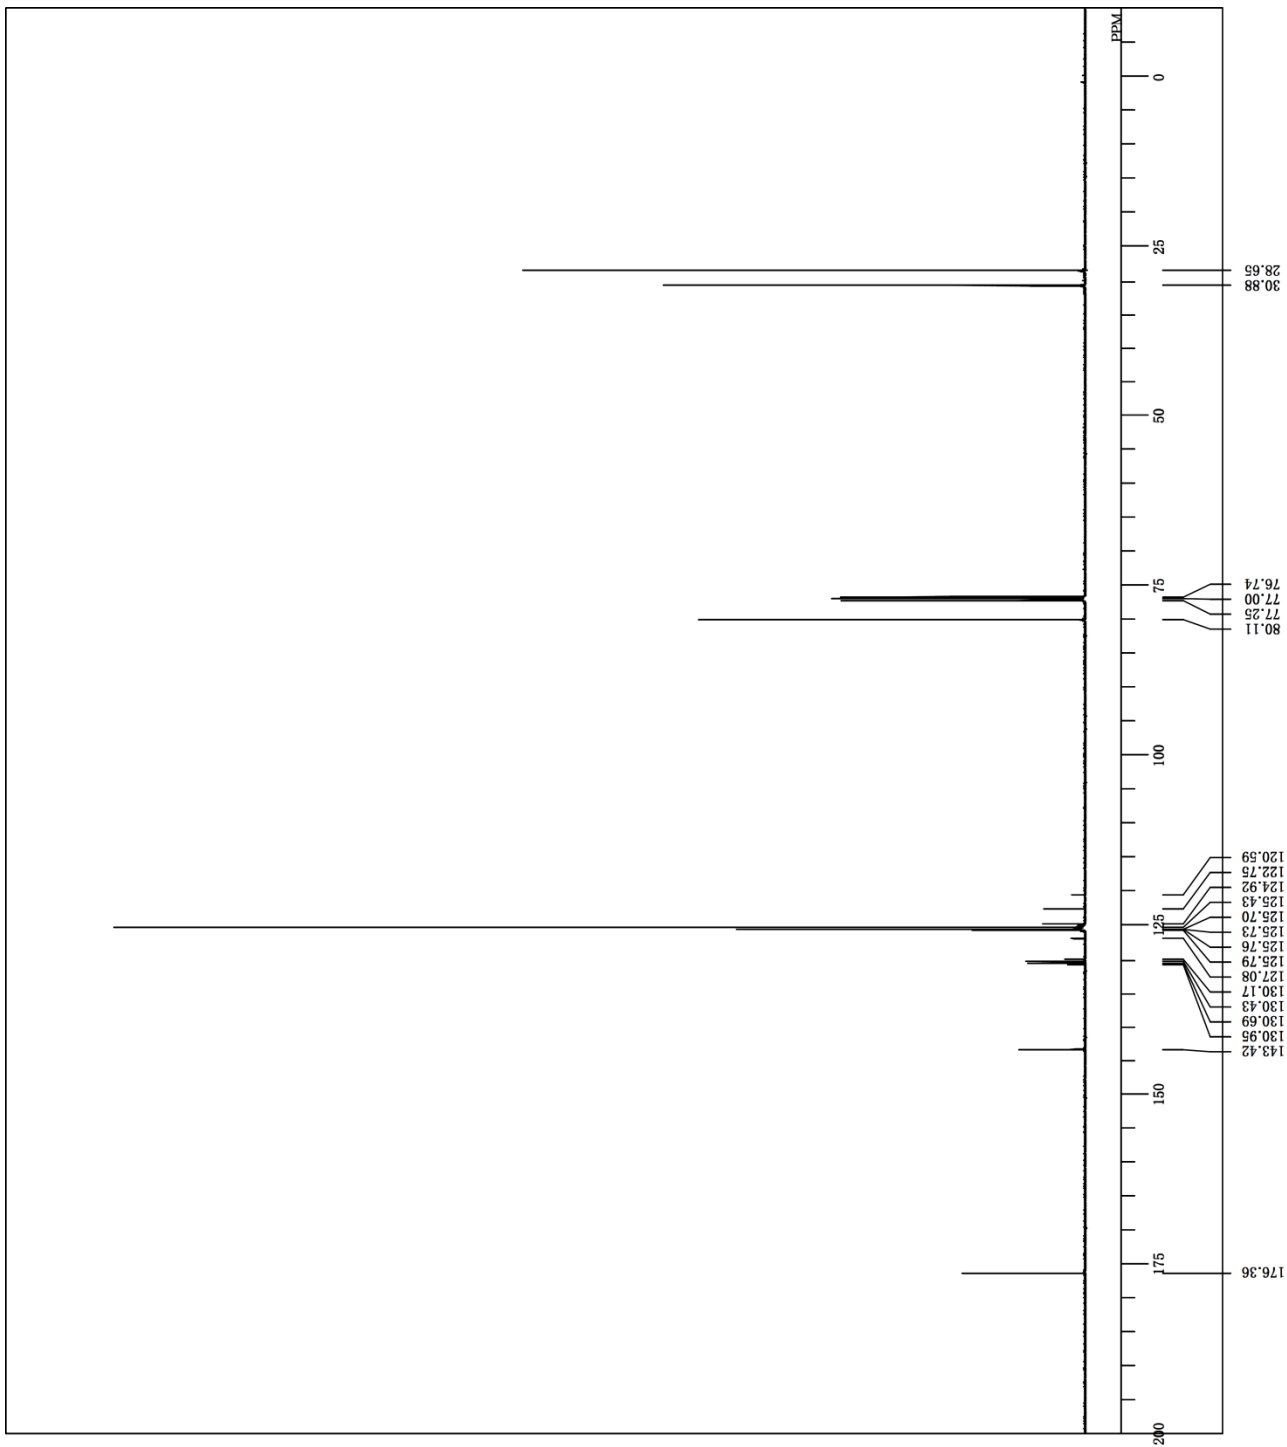

S65

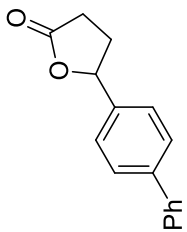

2n

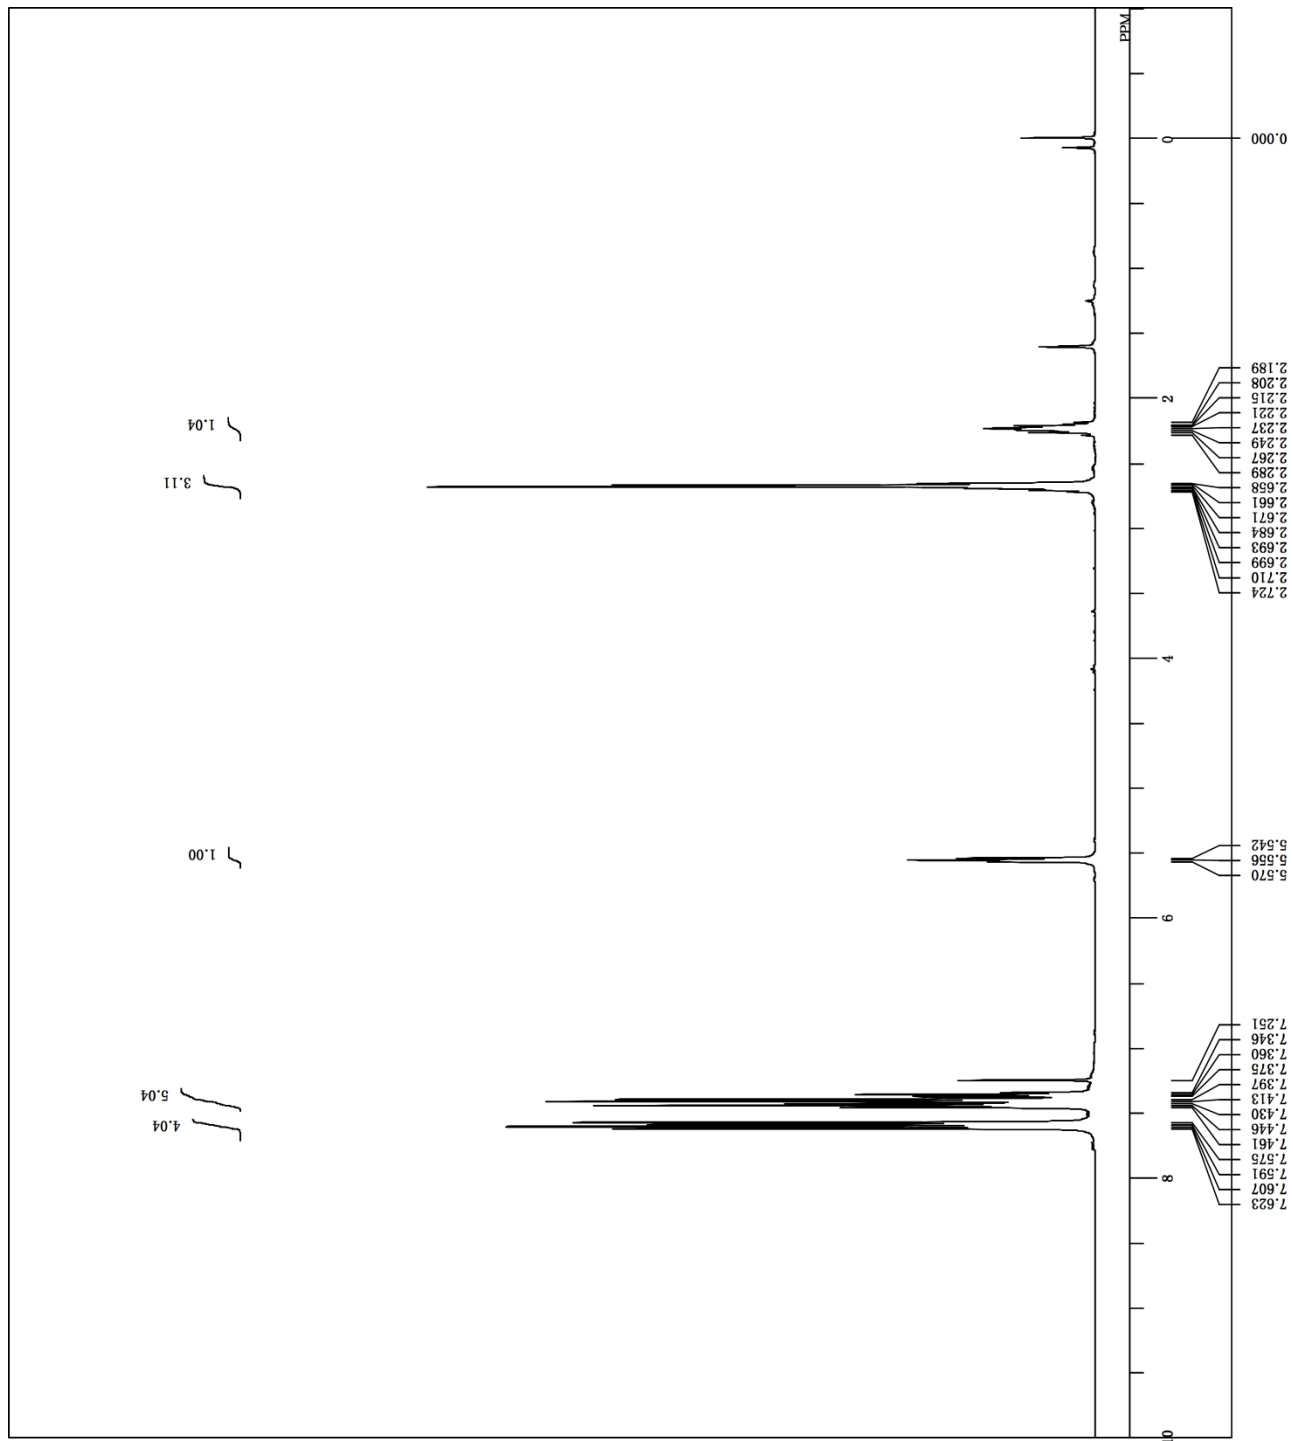

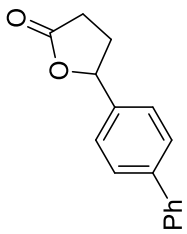

2n

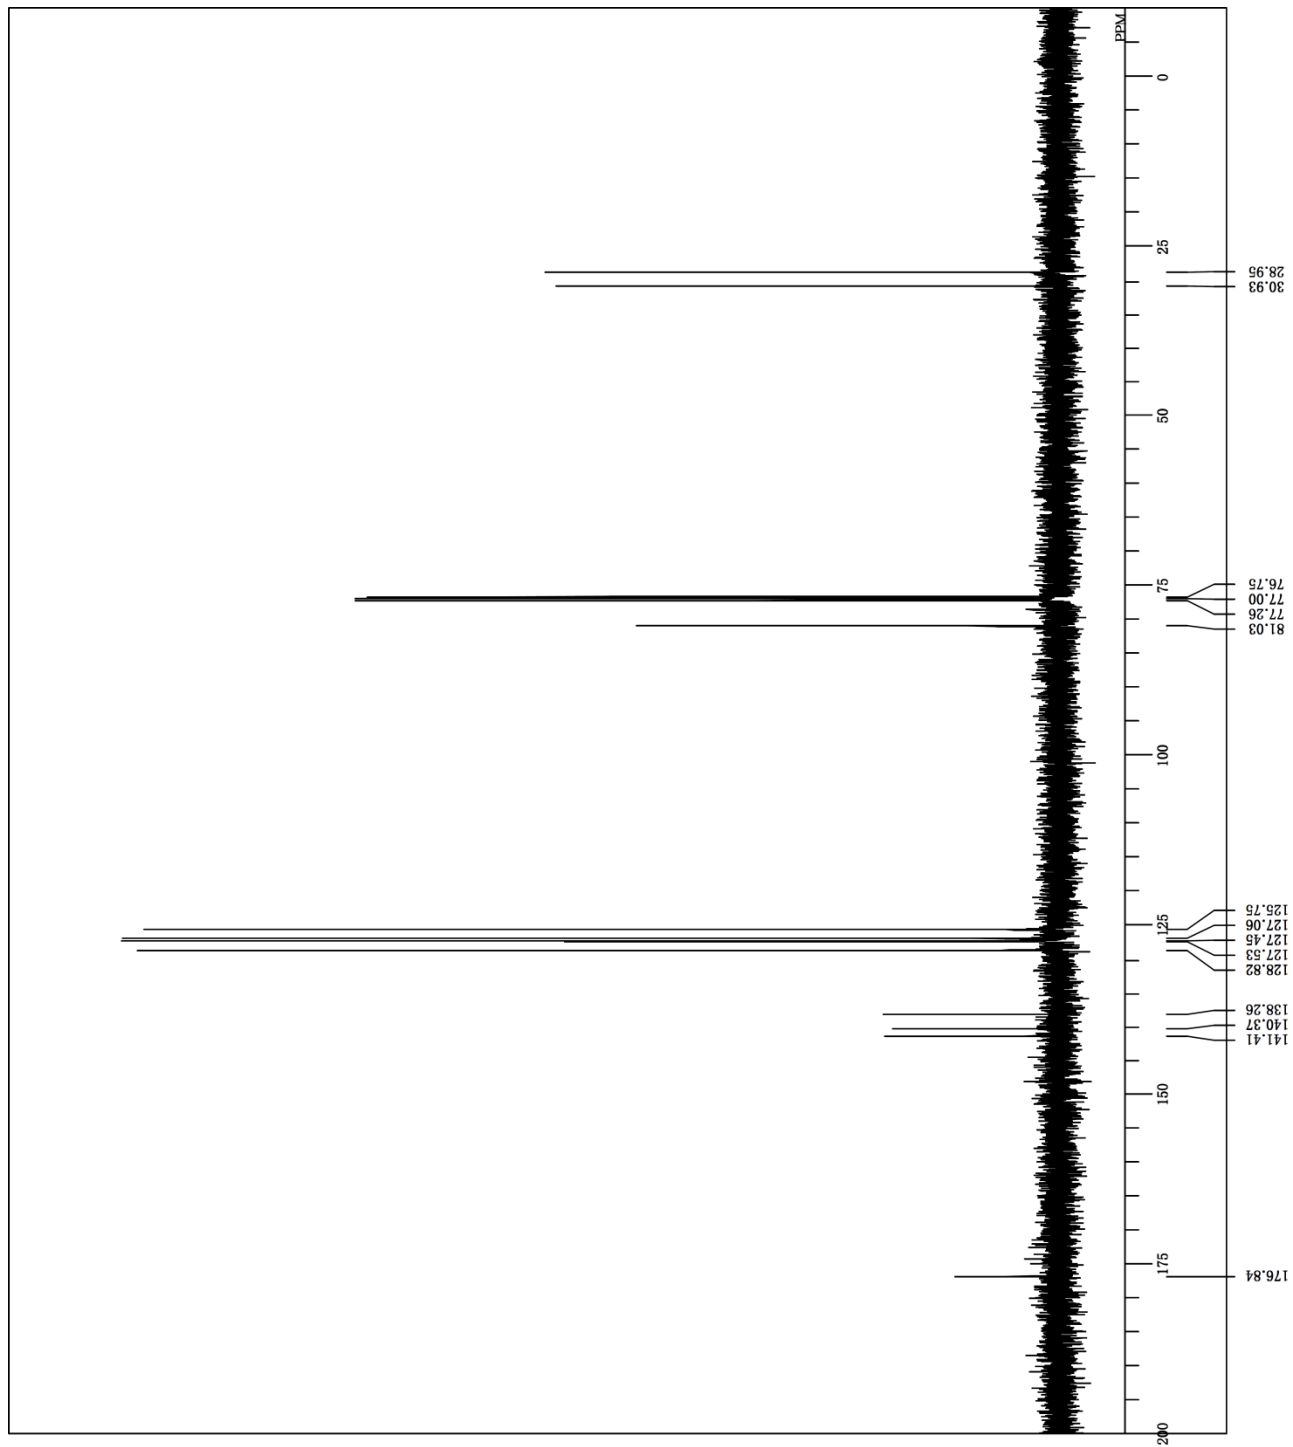

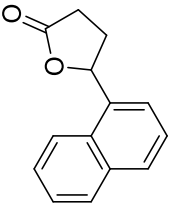

20

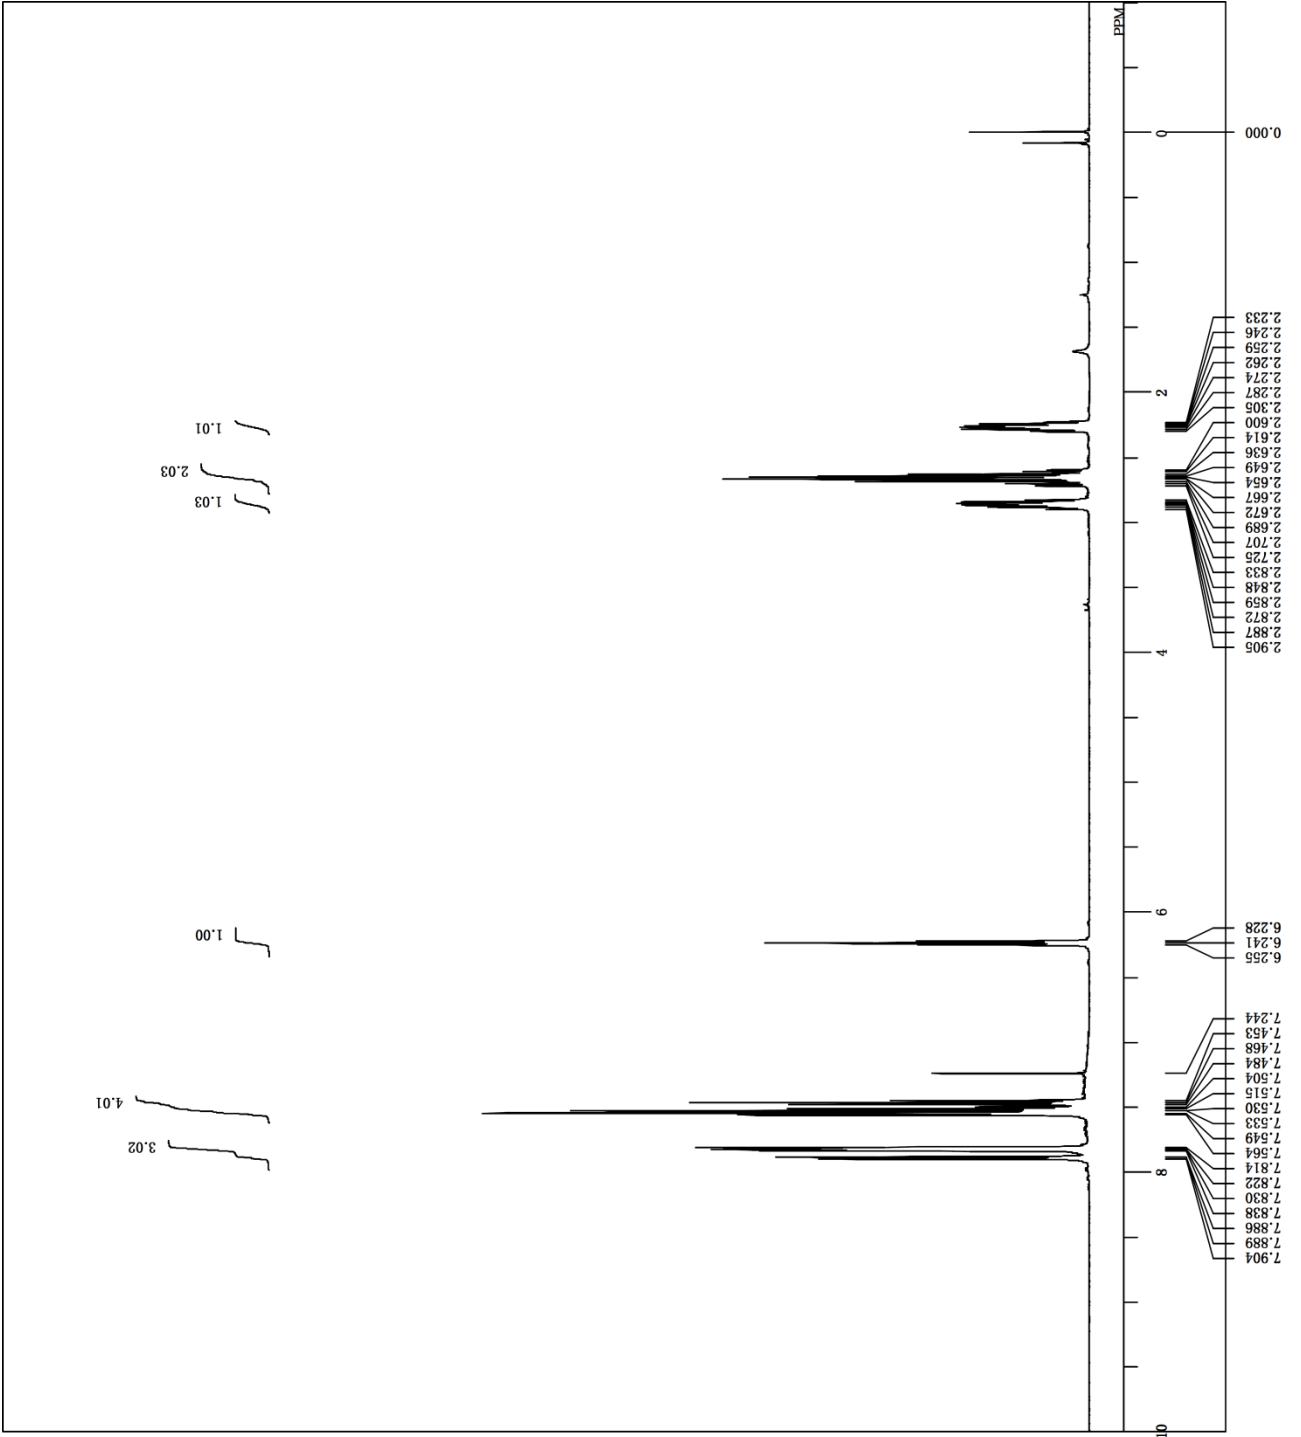

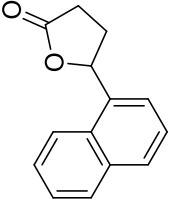

20

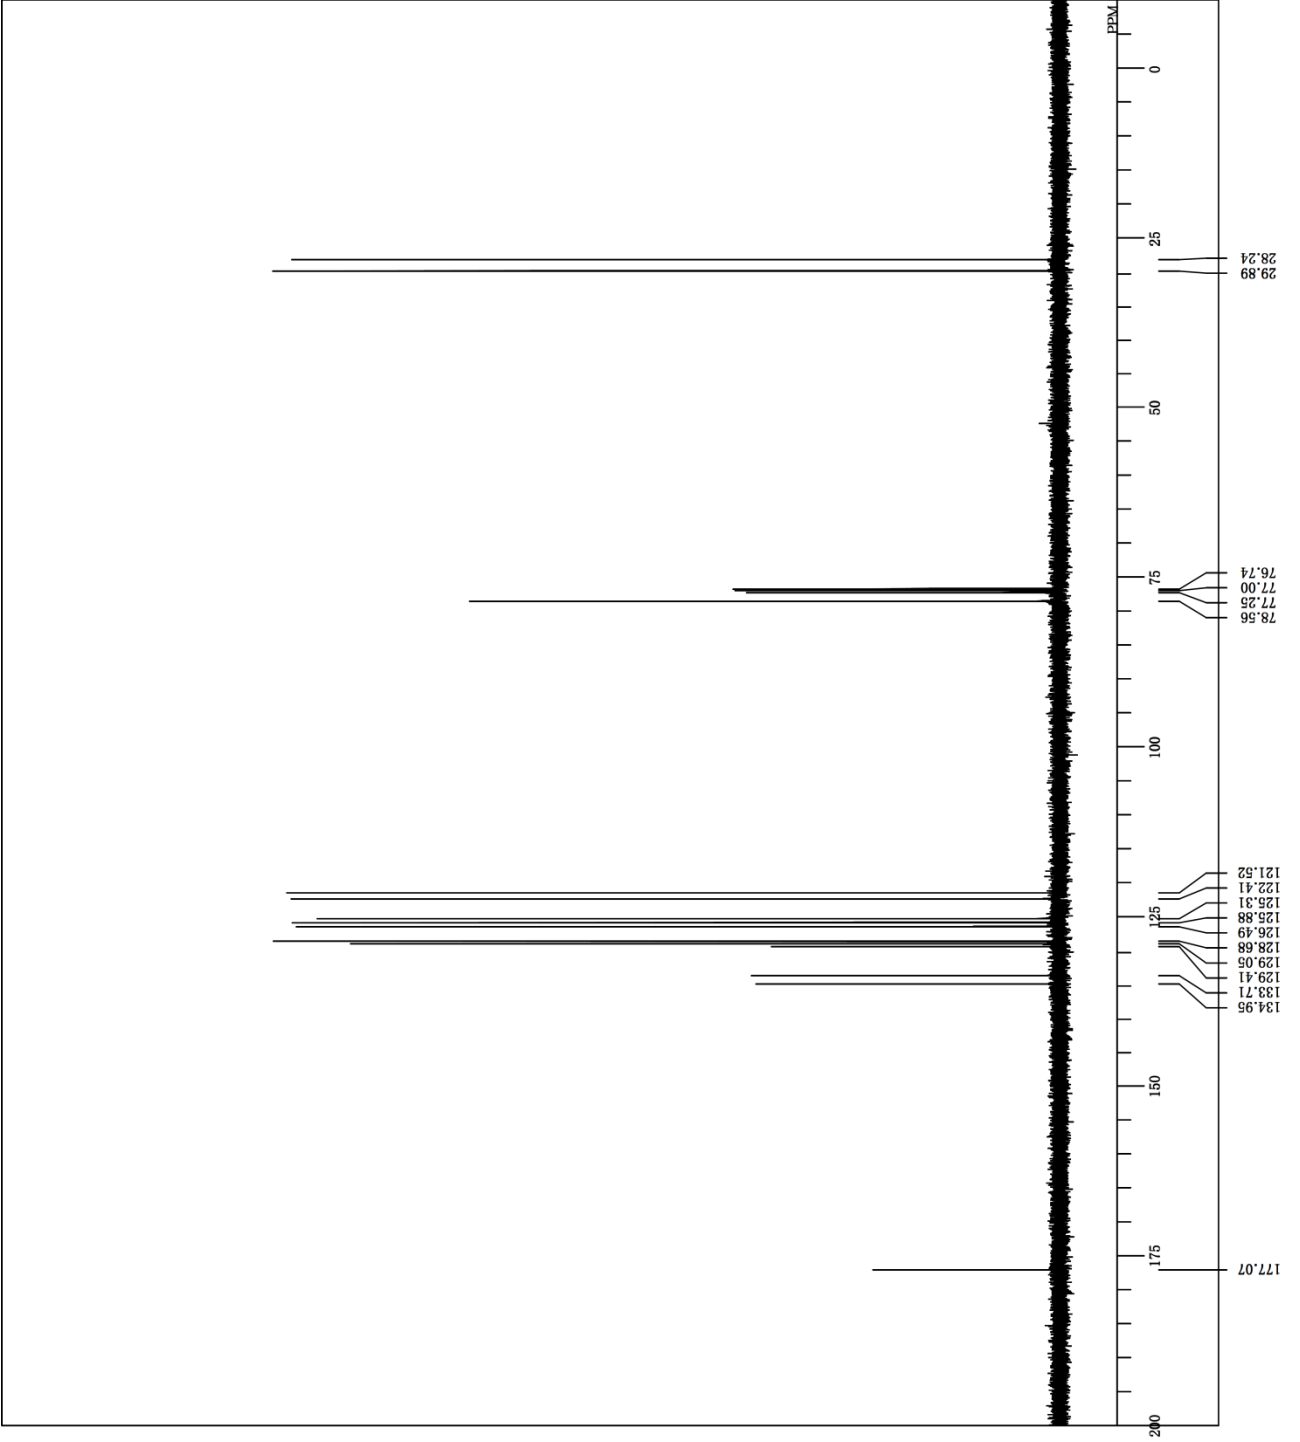

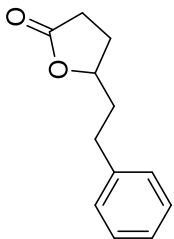

4

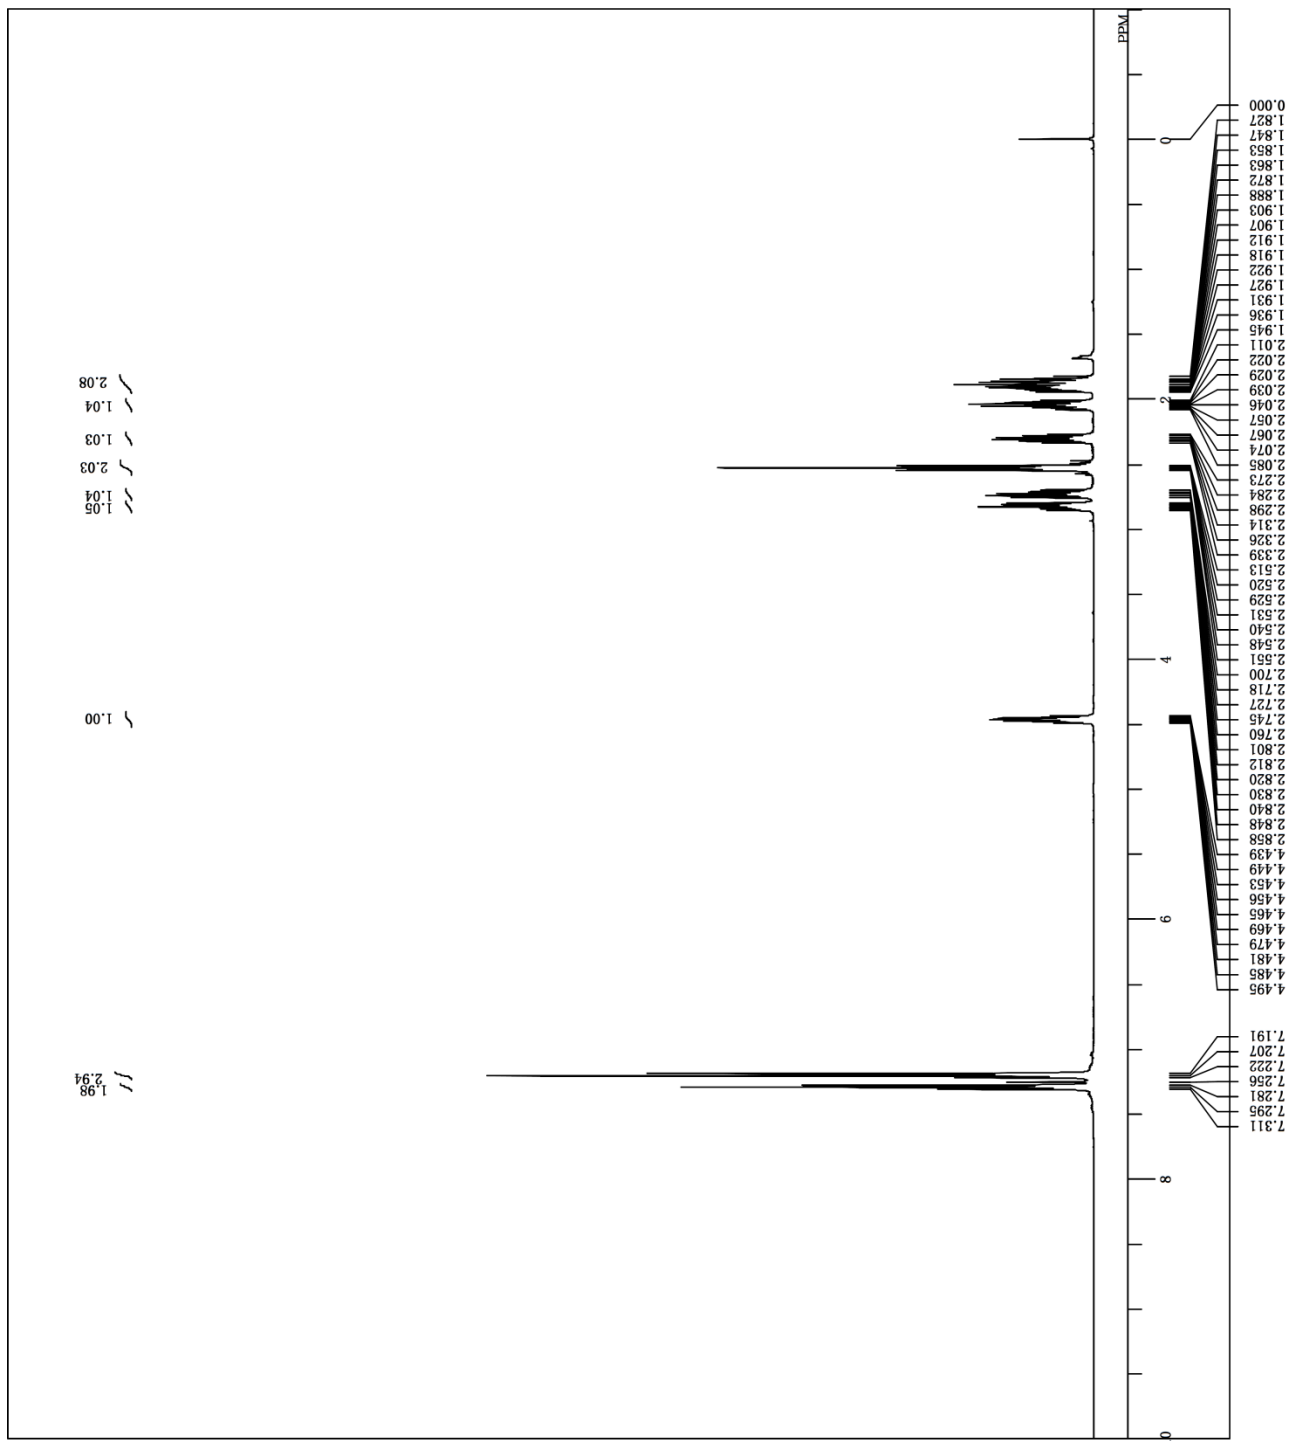



4

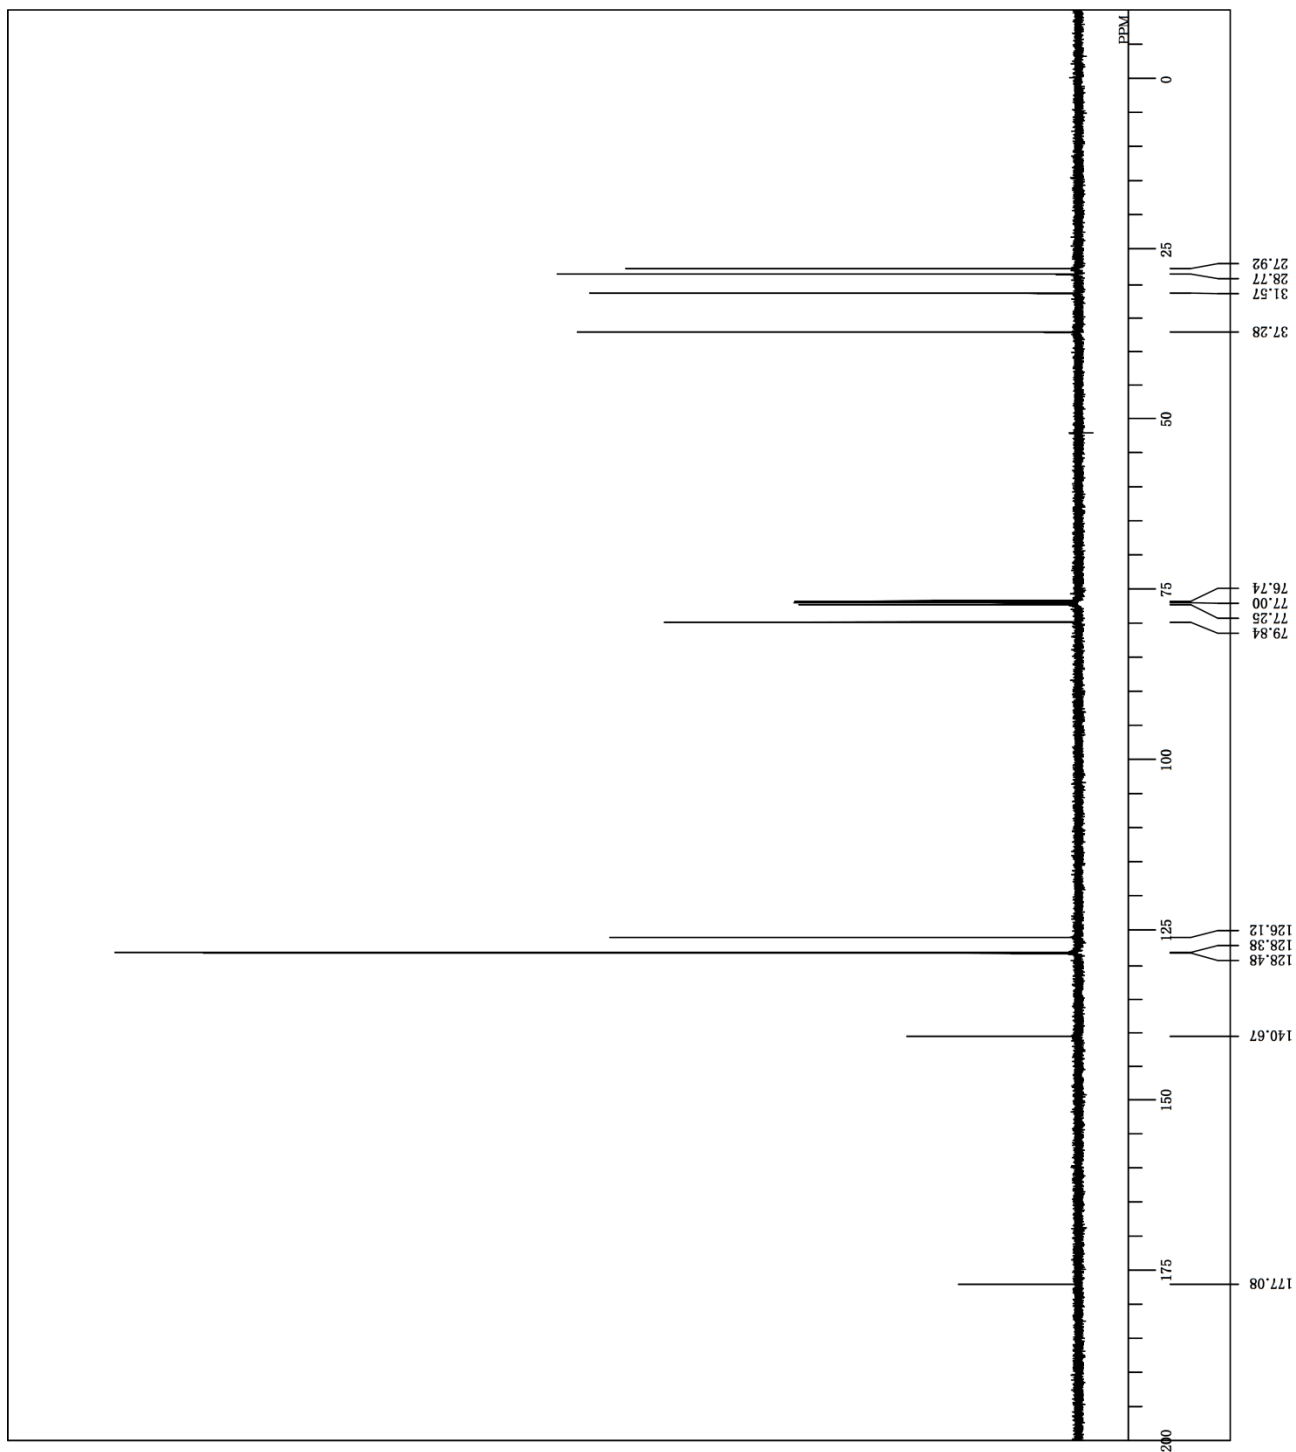

S71

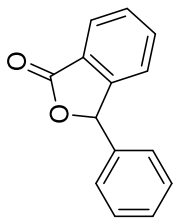

6

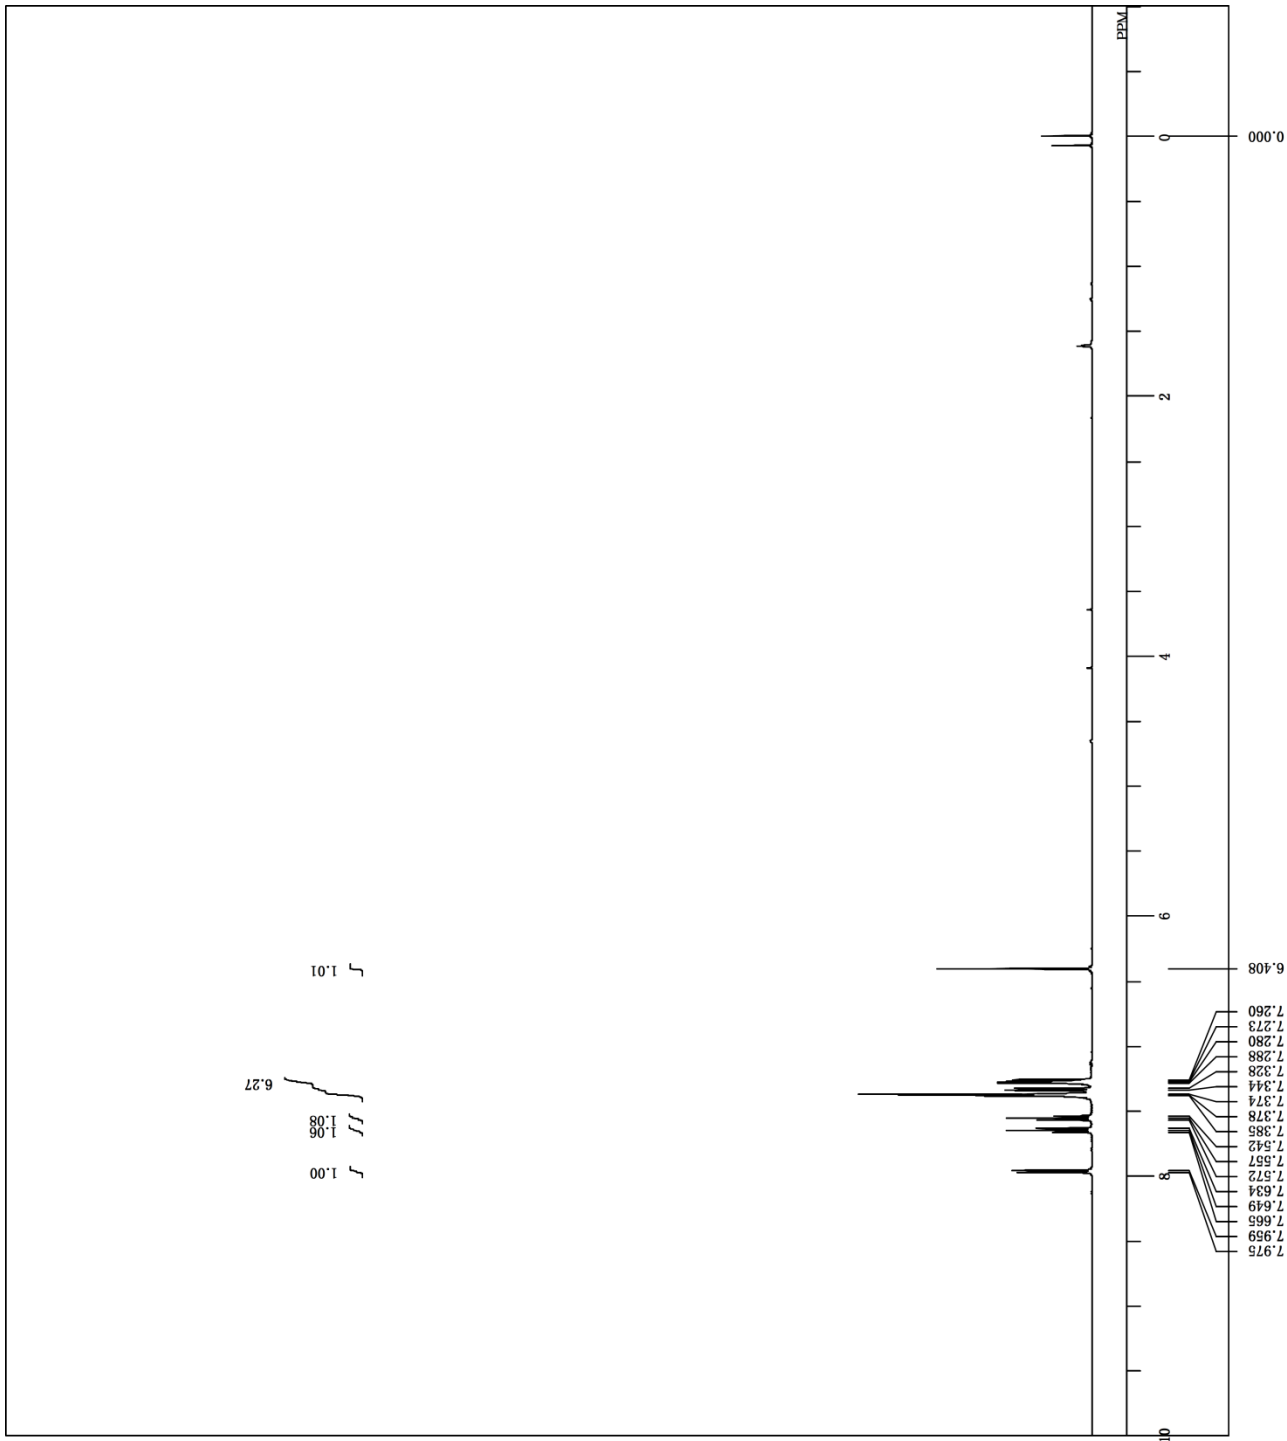





6

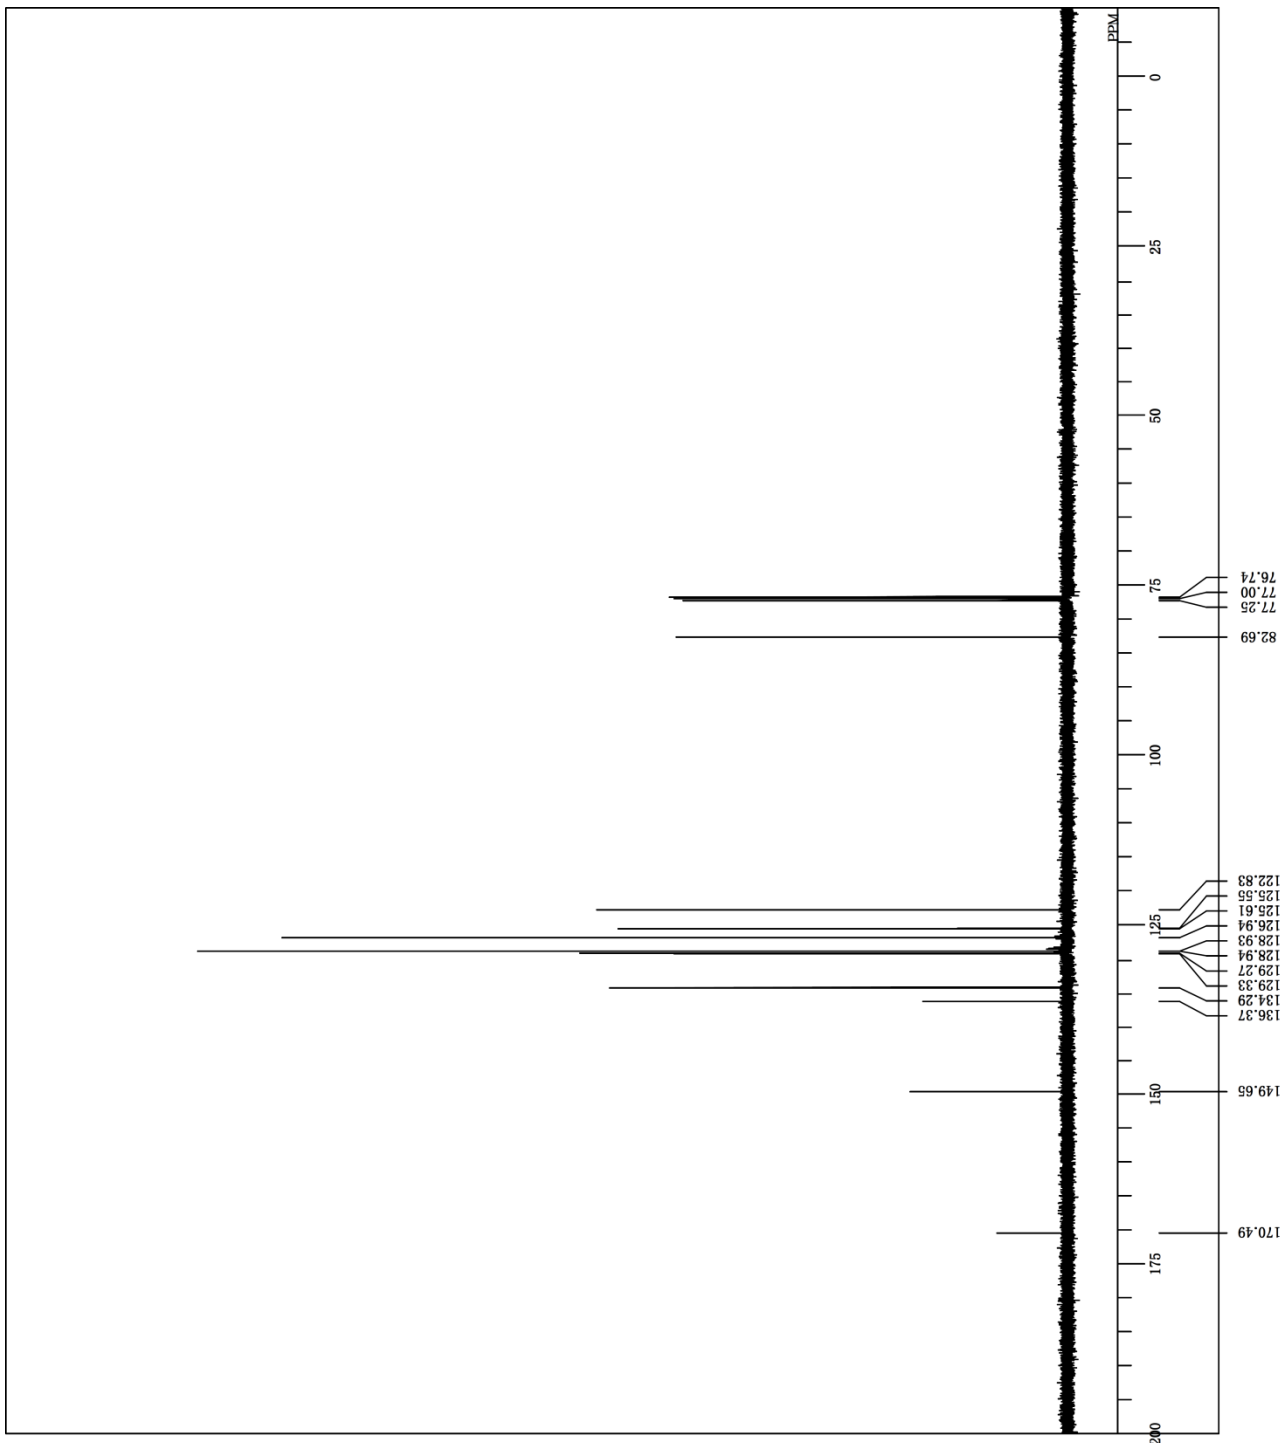

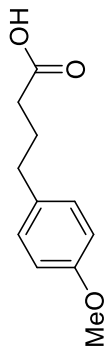

2g'

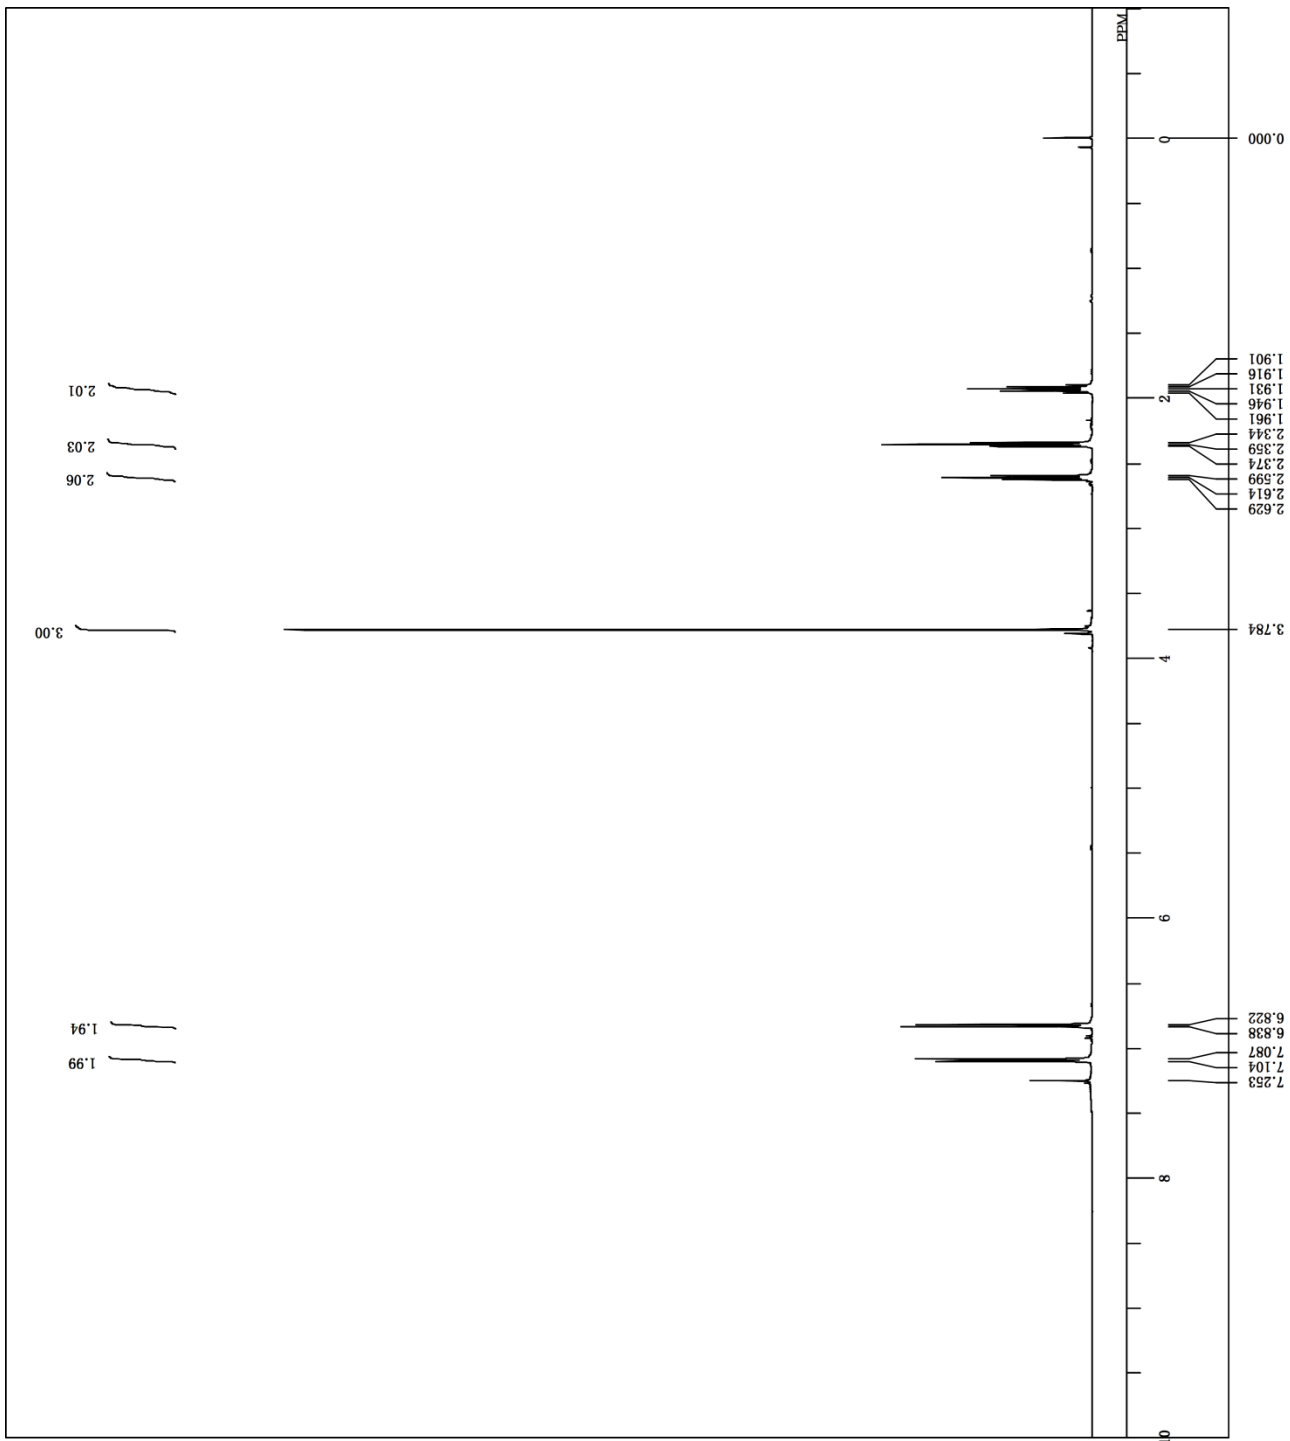

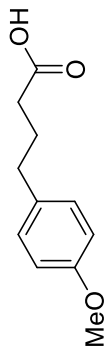

2g'

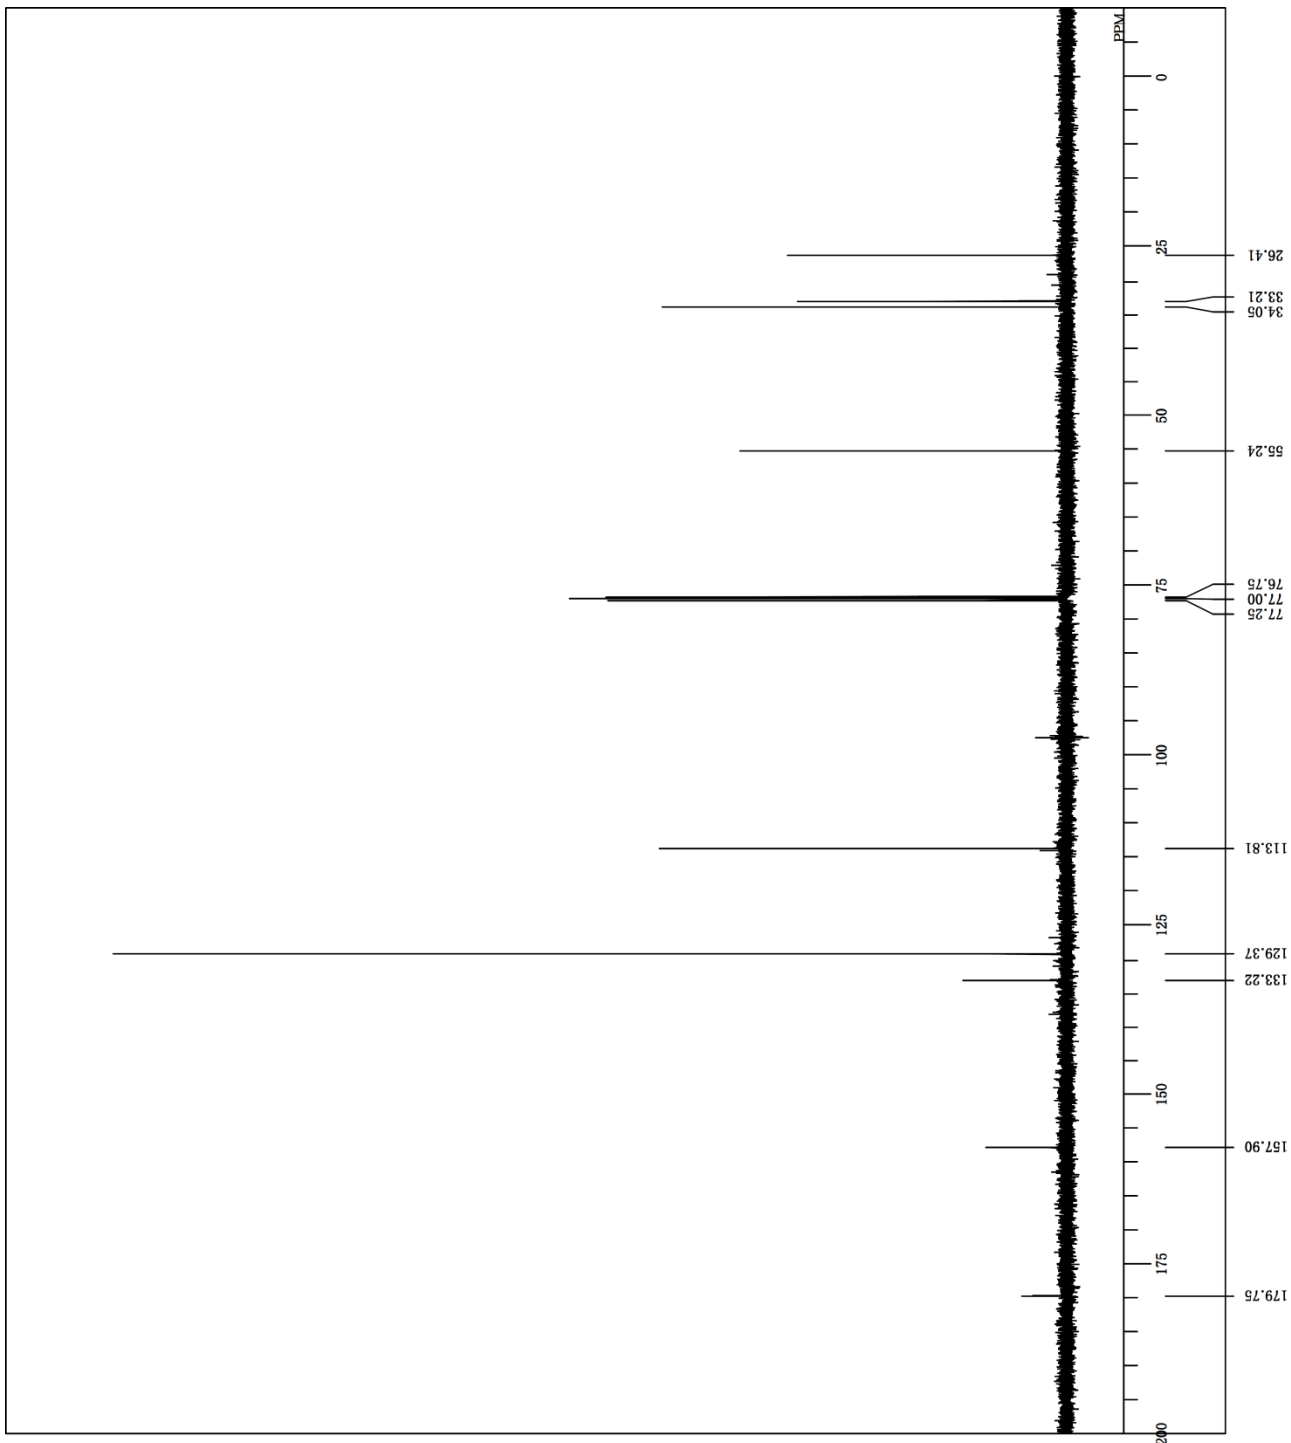

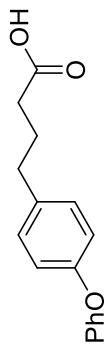

2h'

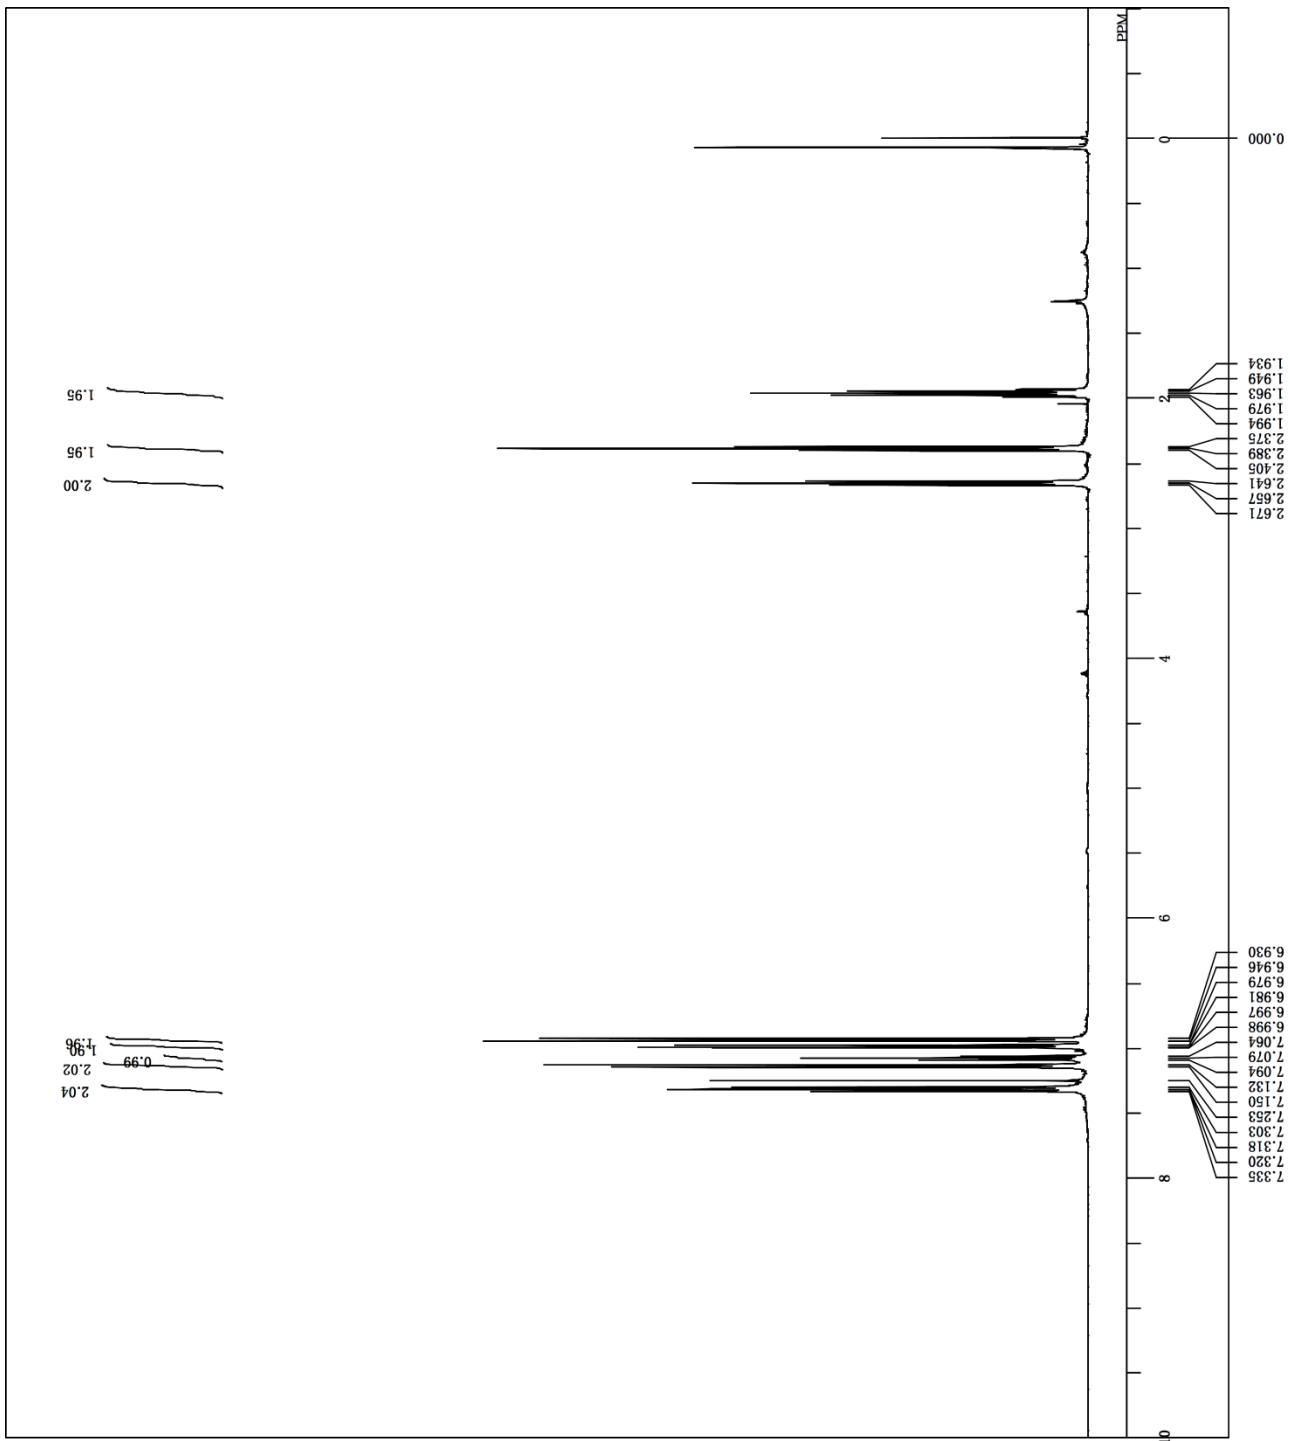



2h'

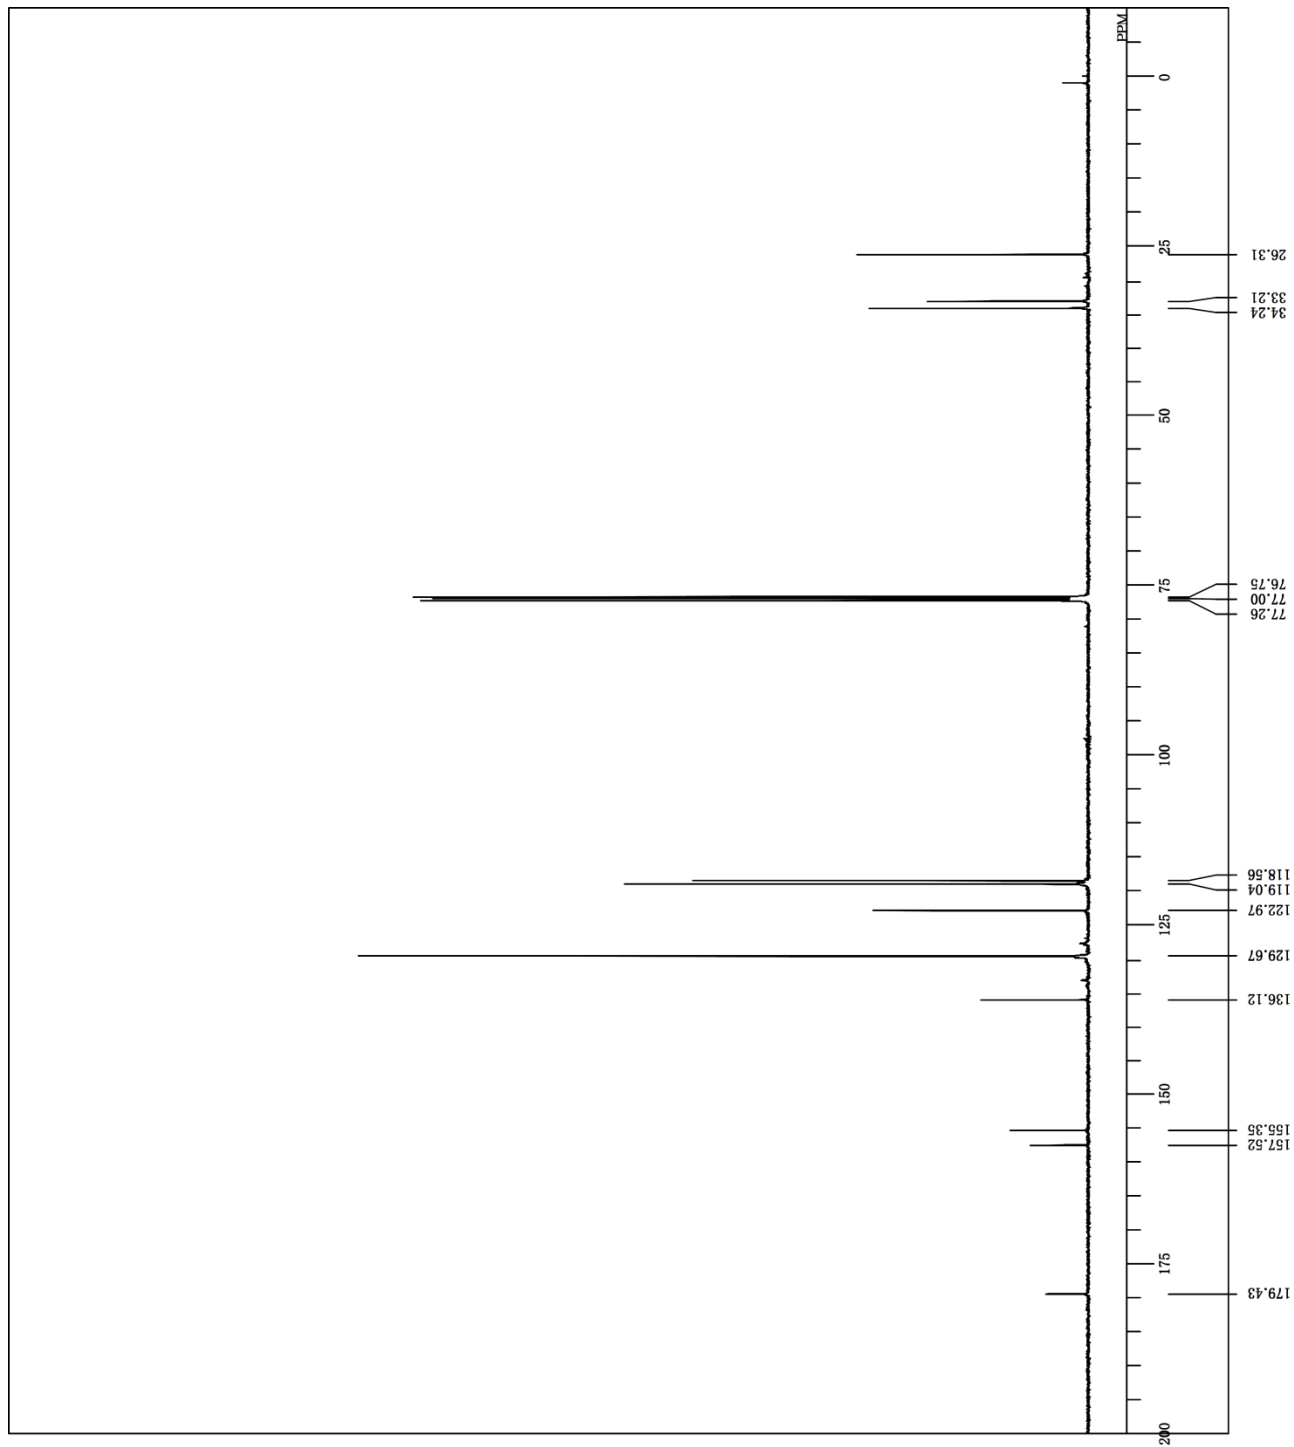

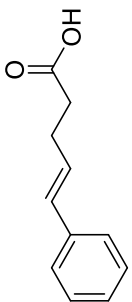

8

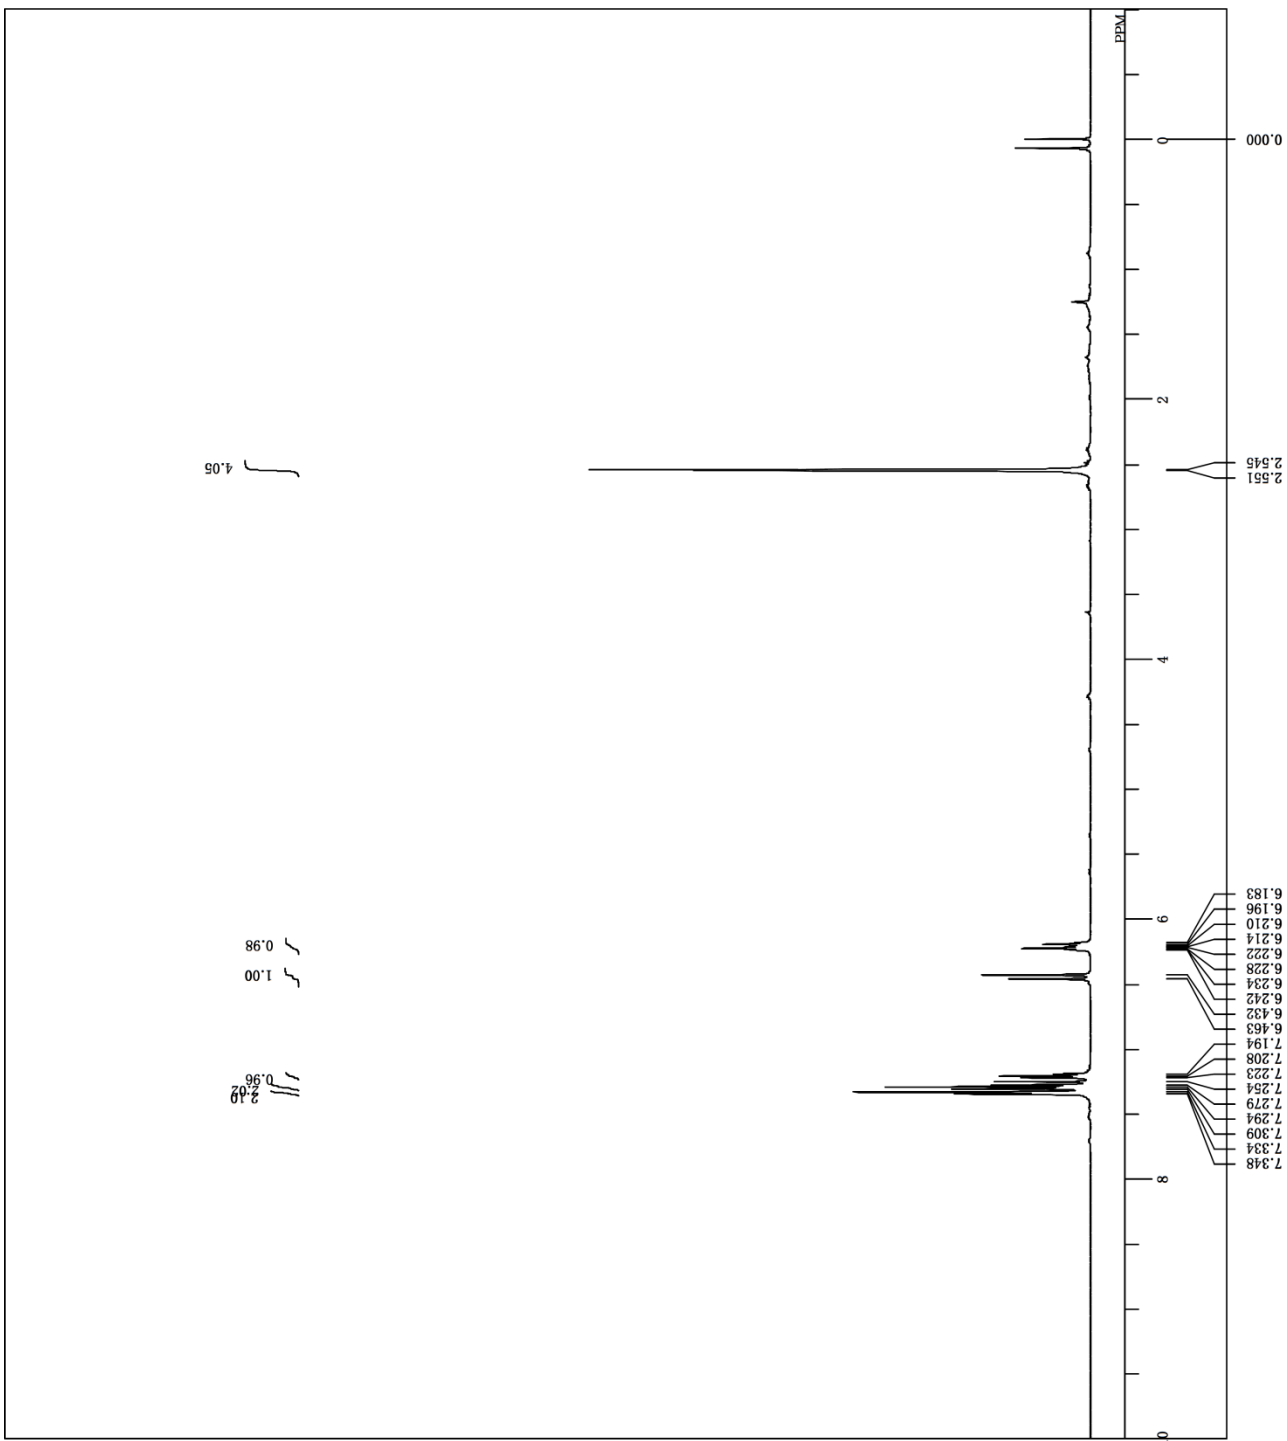



8

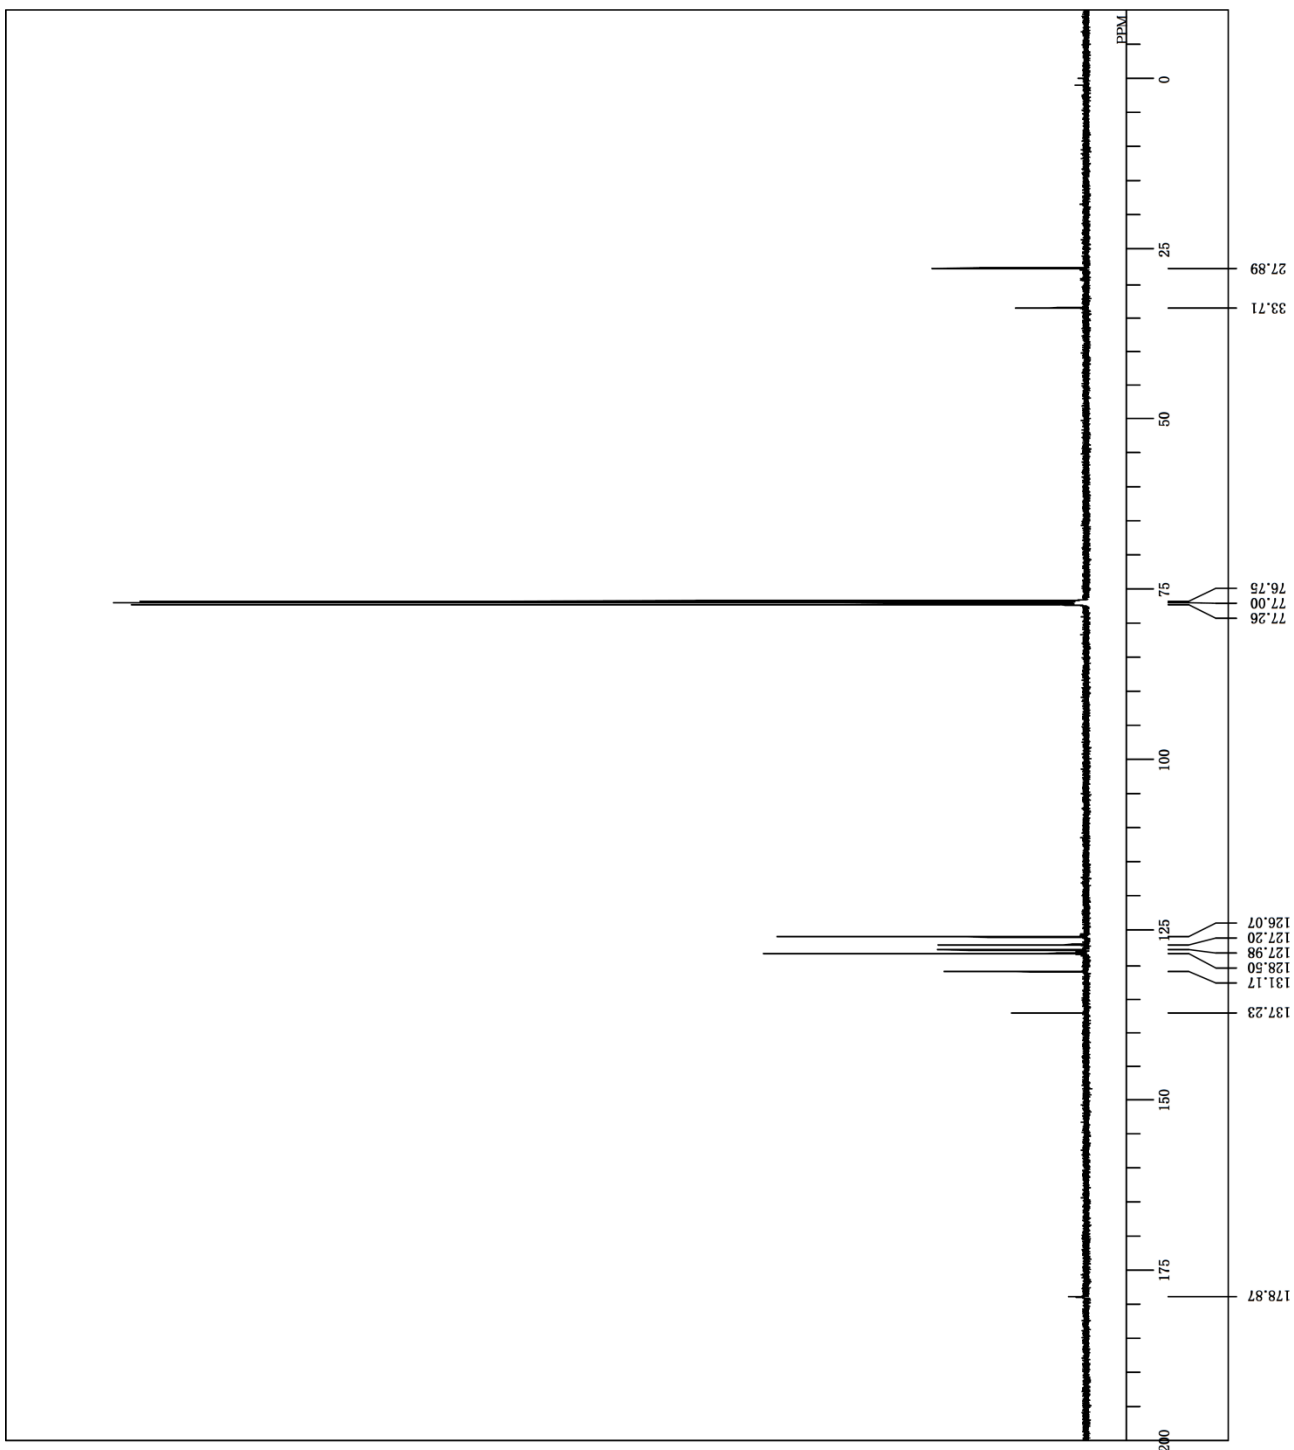

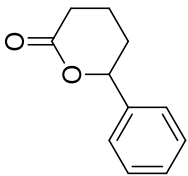

6

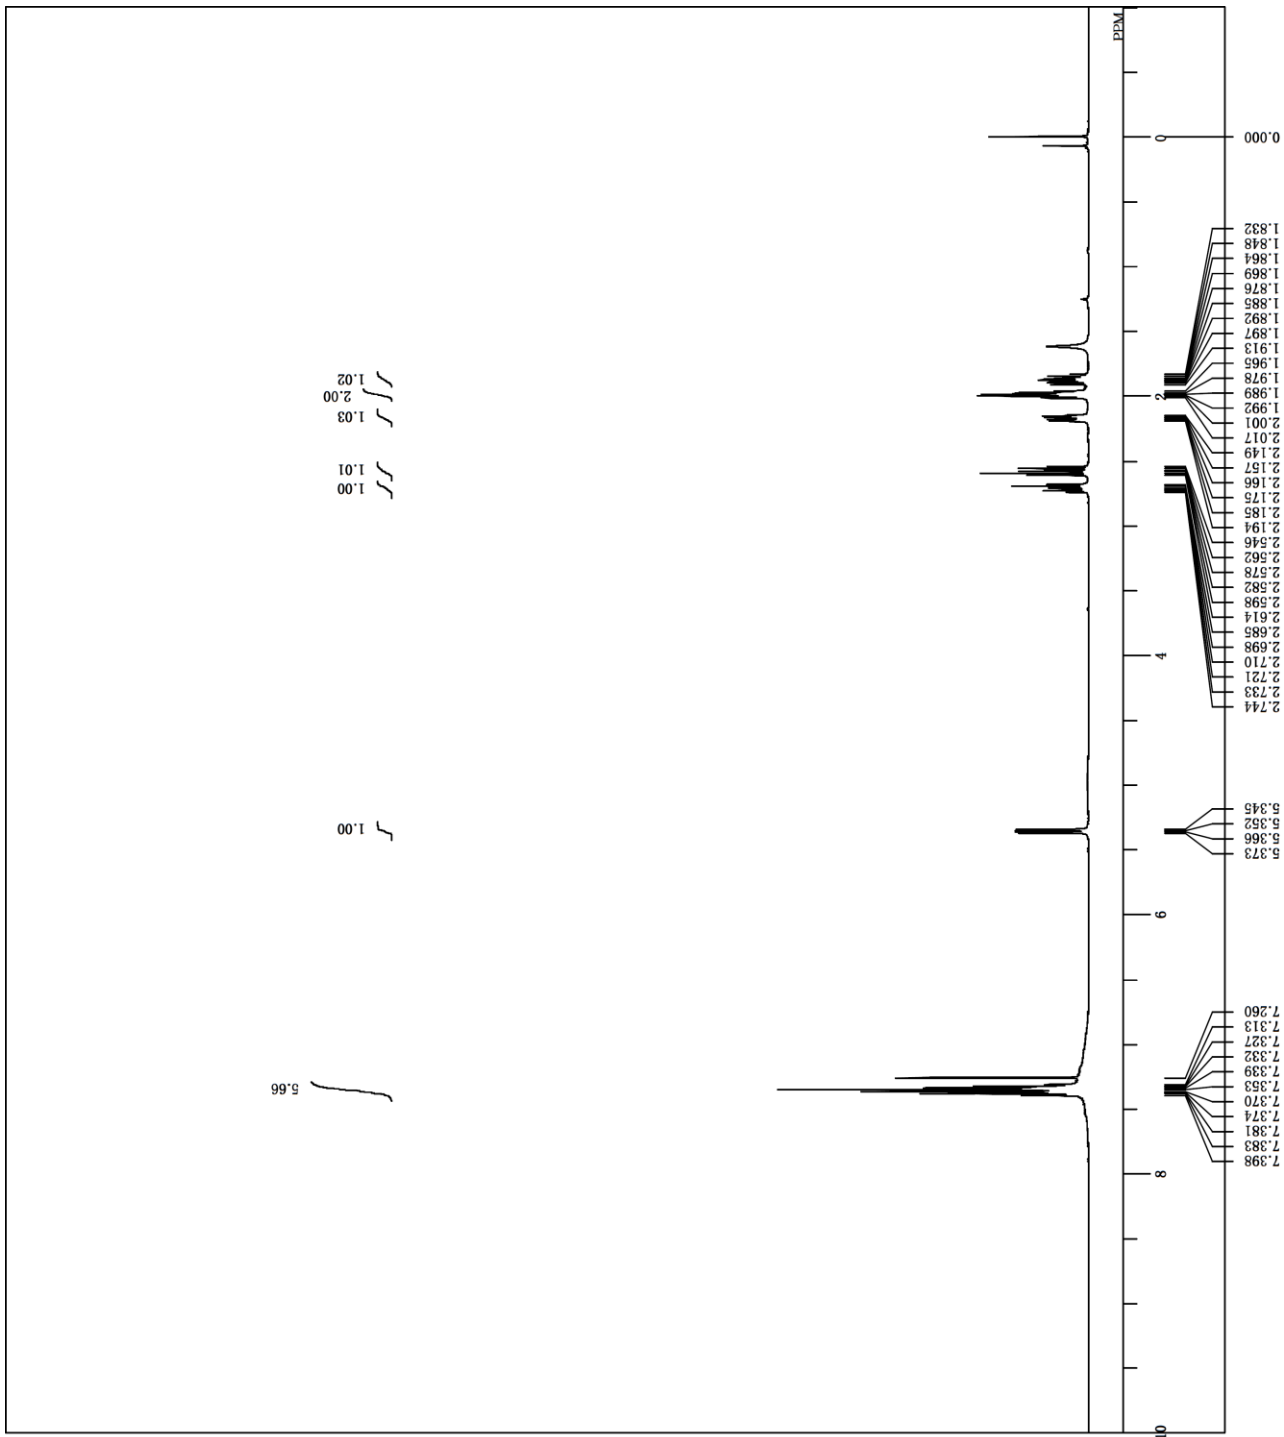





6

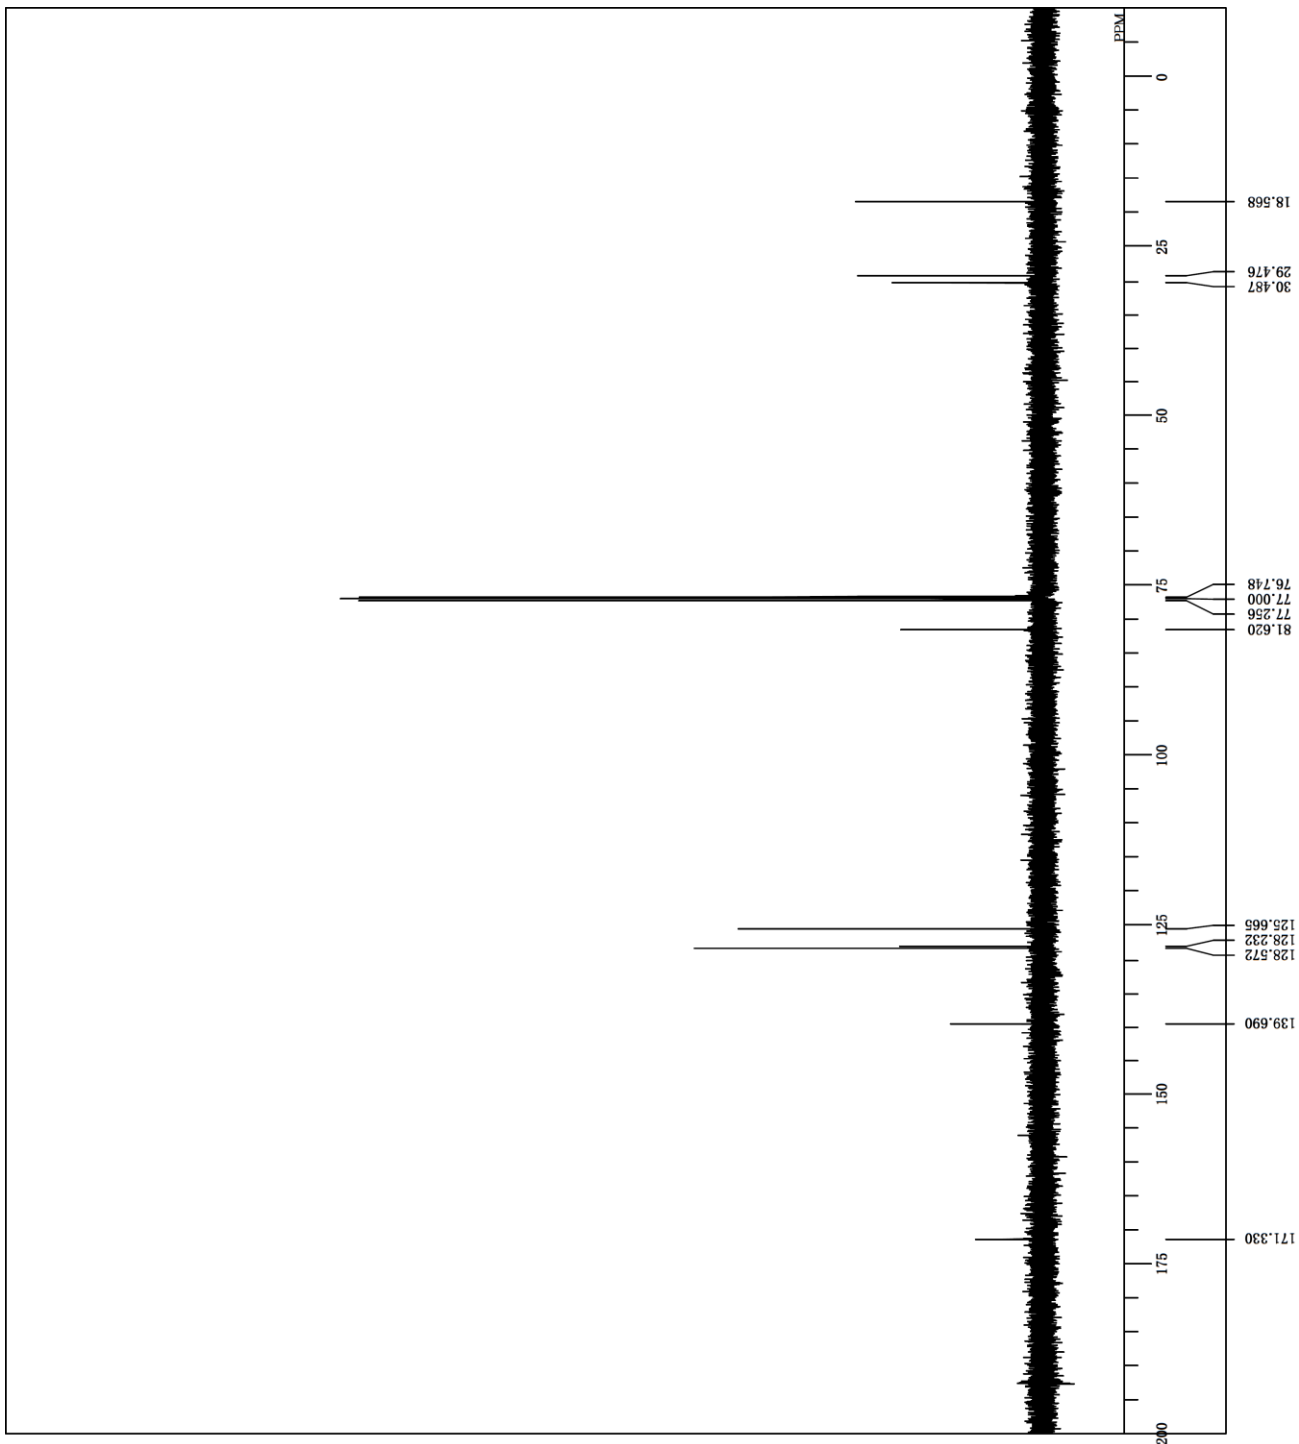

S81

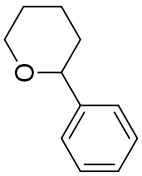

6

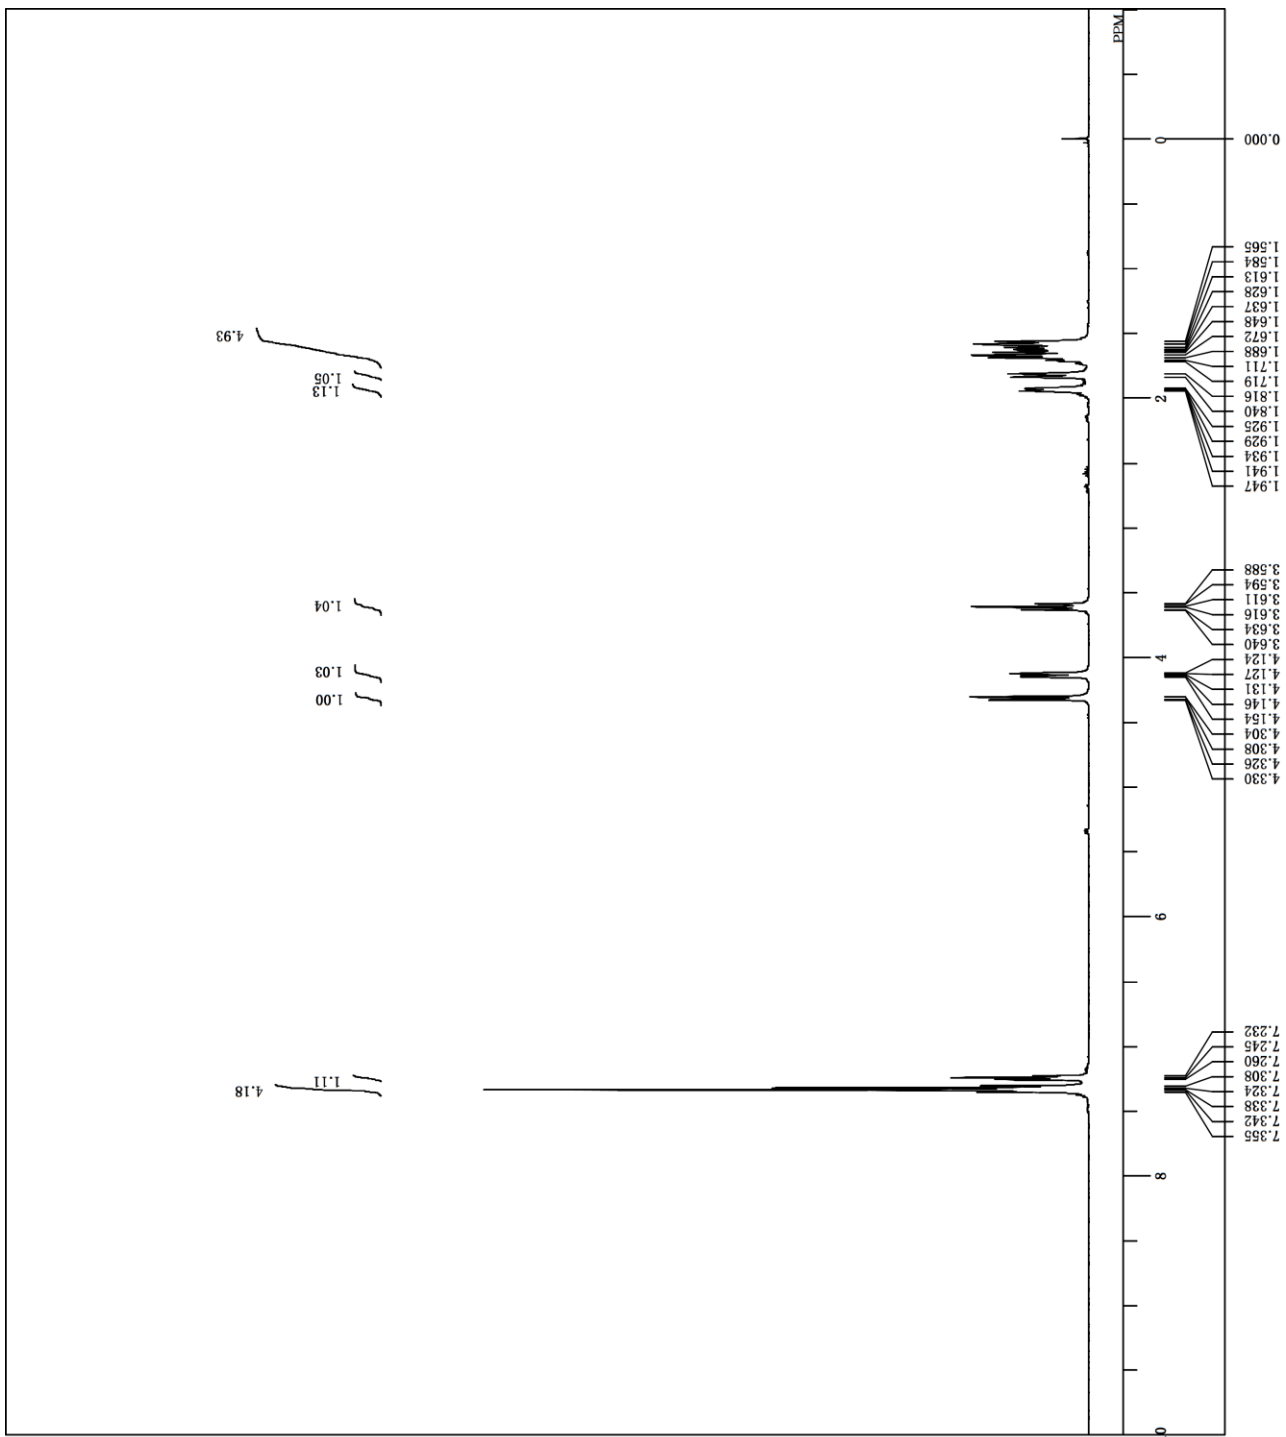

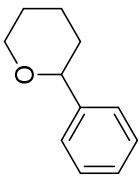

6

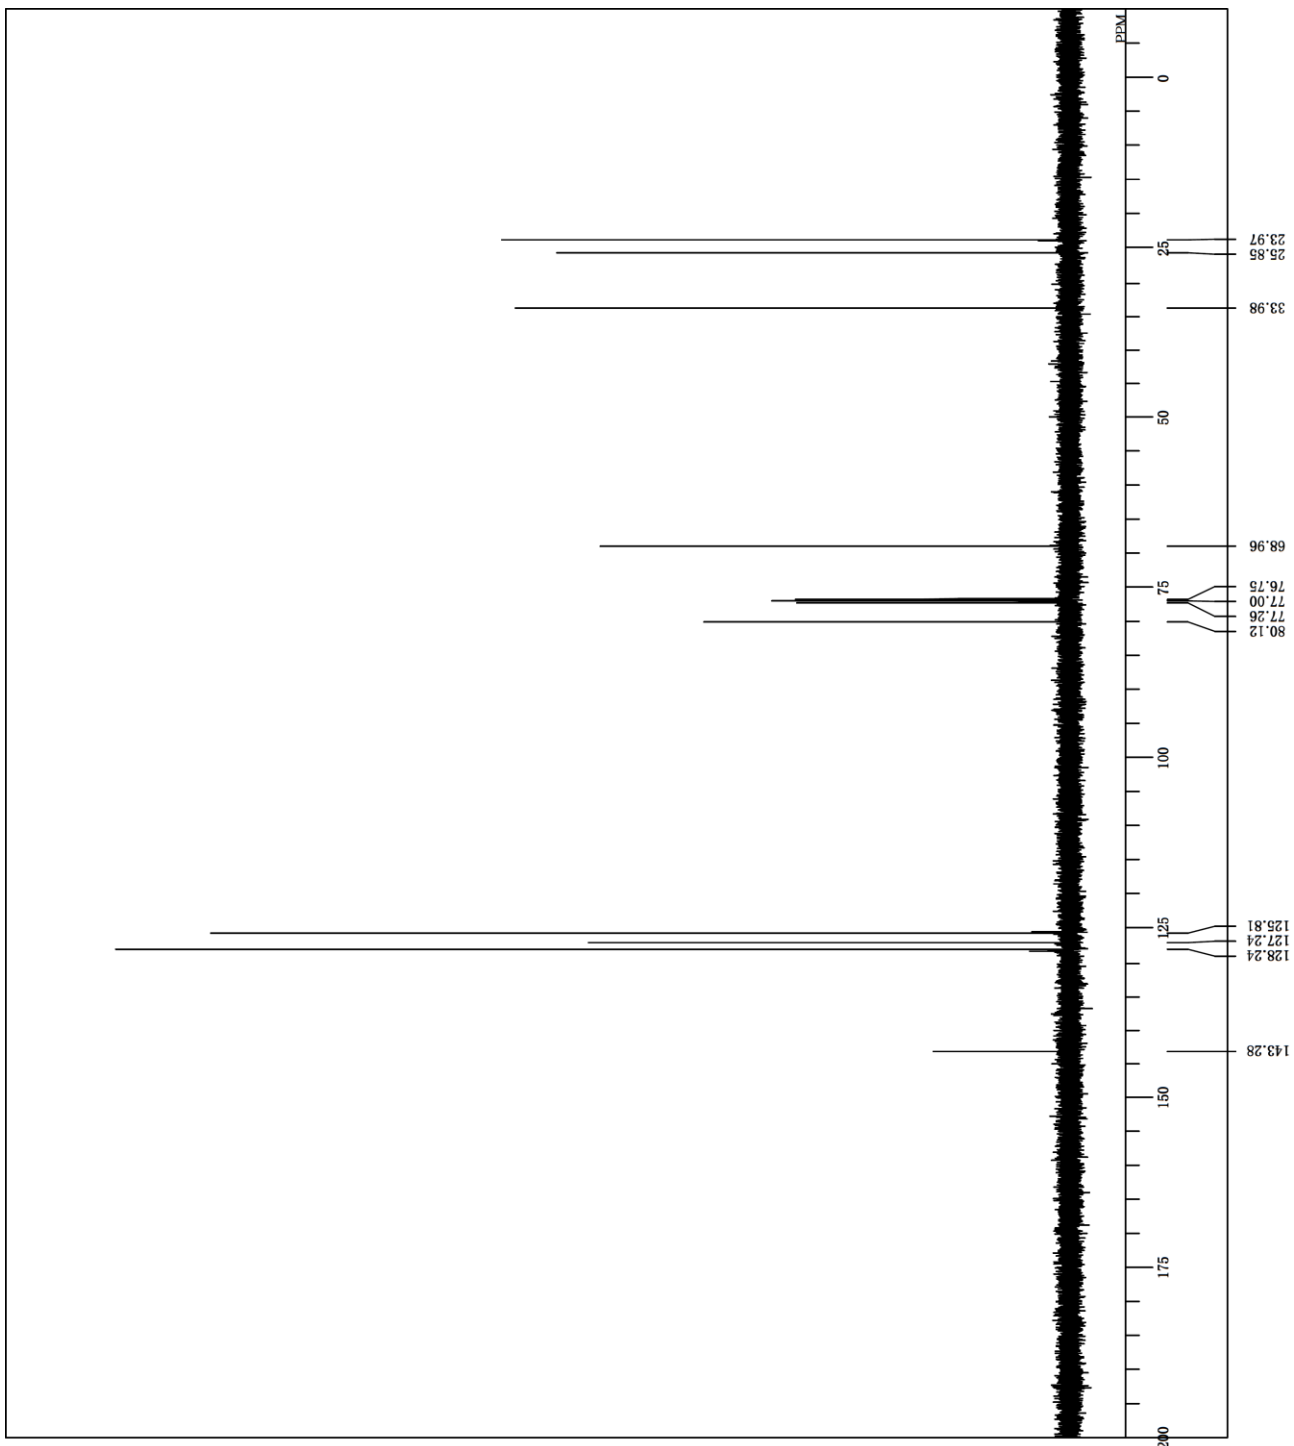

S83
